# Supplementary material for: Synthesis and hybridizing properties of P-stereodefined chimeric [PS]-{DNA:RNA} and [PS]-{DNA:(2′-OMe)-RNA} oligomers
Source: Royal Society of Chemistry journal article supplement (doi:10.1039/d2ra04855h), 2022-01-01
Supplement: d2ra04855h1.pdf [file d2ra04855h1.pdf]

## Supporting Information

### Synthesis and Hybridizing Properties of P-Stereodefined Chimeric [PS]-{DNA:RNA} and [PS]-{DNA:(2'-OMe)-RNA} Oligomers.

Katarzyna Jastrzębska\*, Anna Maciaszek, Rafał Dolot, Agnieszka Tomaszewska-Antczak, Barbara Mikołajczyk  
and Piotr Guga

#### Table of contents

|                                                                                                                                                                                                                         |    |
|-------------------------------------------------------------------------------------------------------------------------------------------------------------------------------------------------------------------------|----|
| Structures of <sup>M</sup> N-OTP monomers.....                                                                                                                                                                          | 2  |
| Structures of <sup>T</sup> N-OTP monomers .....                                                                                                                                                                         | 3  |
| Separation of the P-diastereomers of <sup>M</sup> N-OTP and <sup>T</sup> N-OTP monomers.....                                                                                                                            | 4  |
| HR MS spectra for separated P-diastereomers of <sup>M</sup> N-OTP and <sup>T</sup> N-OTP.....                                                                                                                           | 6  |
| <sup>1</sup> H NMR spectra for separated P-diastereomers of <sup>M</sup> N-OTP and <sup>T</sup> N-OTP monomers.....                                                                                                     | 22 |
| <sup>13</sup> C NMR spectra for separated P-diastereomers of <sup>M</sup> N-OTP and <sup>T</sup> N-OTP monomers.....                                                                                                    | 39 |
| <sup>31</sup> P NMR spectra for separated P-diastereomers of <sup>M</sup> N-OTP and <sup>T</sup> N-OTP monomers.....                                                                                                    | 56 |
| Crystallography of the detritylated <i>fast</i> -eluting 3a monomer.....                                                                                                                                                | 73 |
| Details of X-ray Data Collection and Reduction.....                                                                                                                                                                     | 73 |
| Table S1. The data-collection, processing and refinement statistics.....                                                                                                                                                | 74 |
| MALDI-TOF mass spectra recorded for chimeric PS-oligonucleotides.....                                                                                                                                                   | 76 |
| Table S2. Efficiency of coupling (cpl) with 2 and 3 in synthesis of [PS]-{DNA: <sup>M</sup> RNA} and [PS]-{DNA:RNA}, respectively, calculated from the DMT <sup>+</sup> decay assay. PSCh = [PS]-Chimeric oligomer..... | 91 |

## Structures of <sup>M</sup>N-OTP monomers

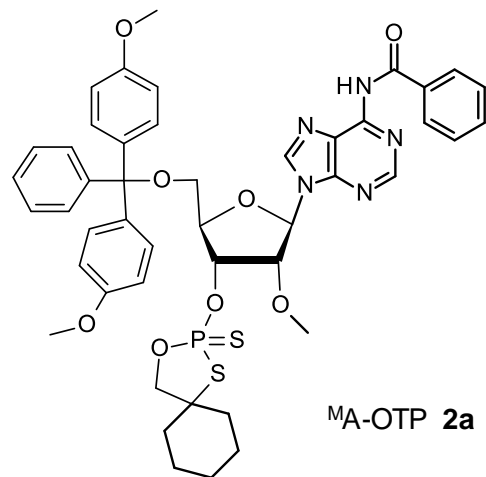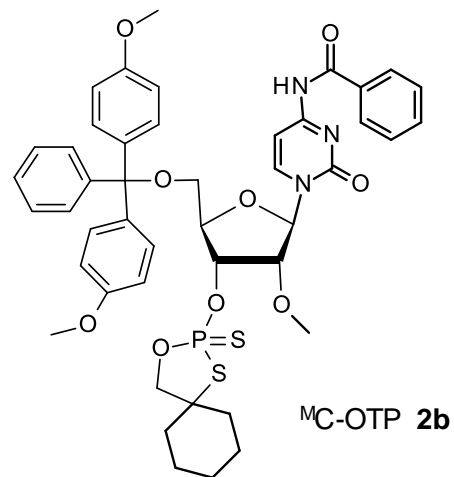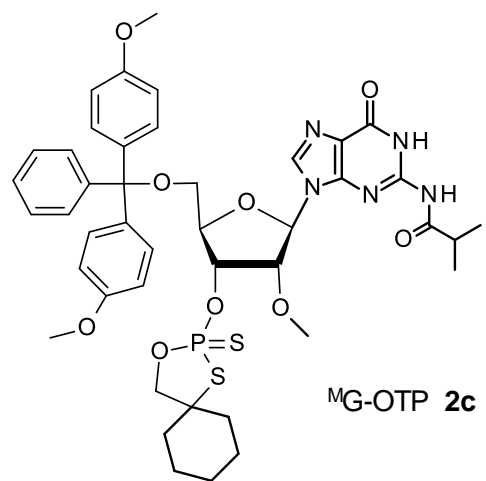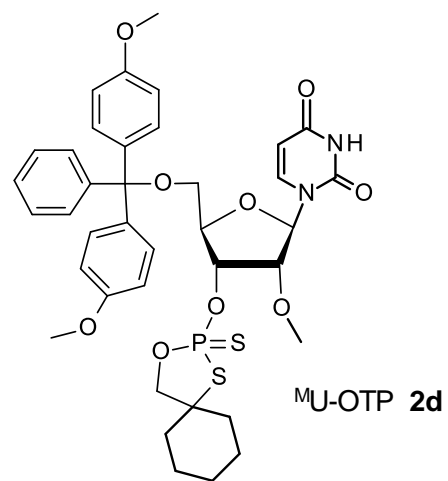

## Structures of <sup>13</sup>C-N-OTP monomers

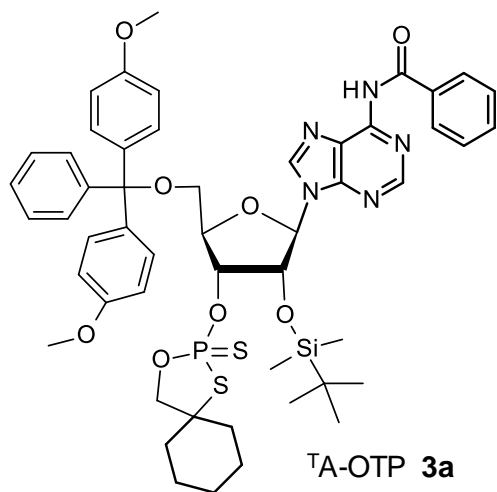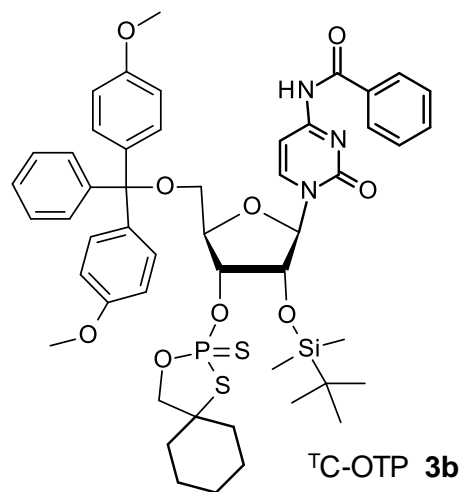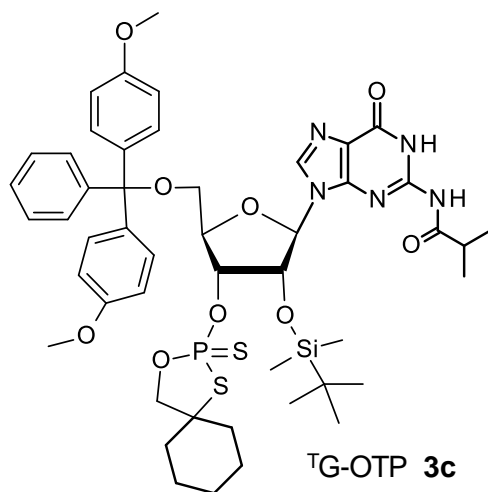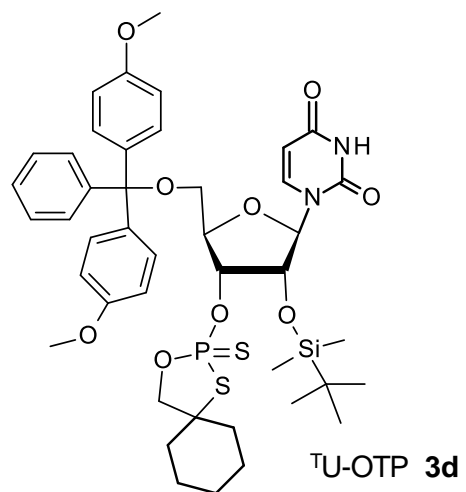

## Separation of the P-diastereomers of <sup>M</sup>N-OTP and <sup>T</sup>N-OTP monomers.

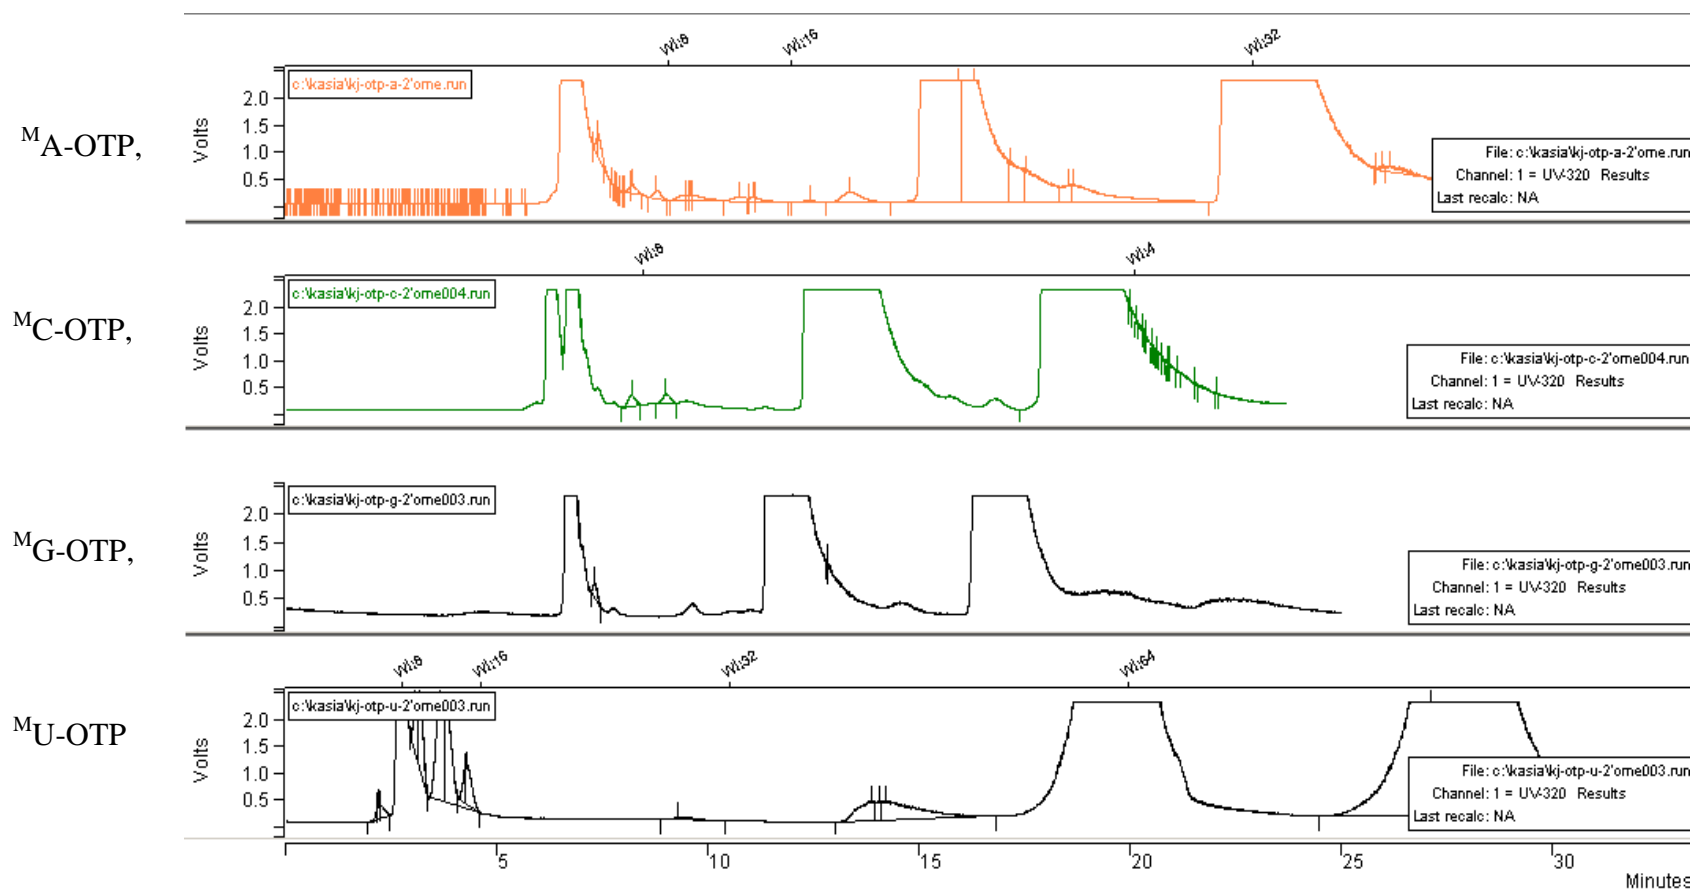

**Figure S1a.** HPLC profiles recorded for semi-preparative separation of the P-diastereomers of <sup>M</sup>A-OTP, <sup>M</sup>C-OTP, <sup>M</sup>G-OTP, and <sup>M</sup>U-OTP. The conditions were determined using a Phenomenex Luna 5  $\mu$ m Silica column (100 $\text{\AA}$ ; 250 $\times$ 10 mm; flow rate 5 mL/min). The UV detector was set at 275 nm. For each run, the column was loaded with 100-150 mg <sup>M</sup>N-OTP.

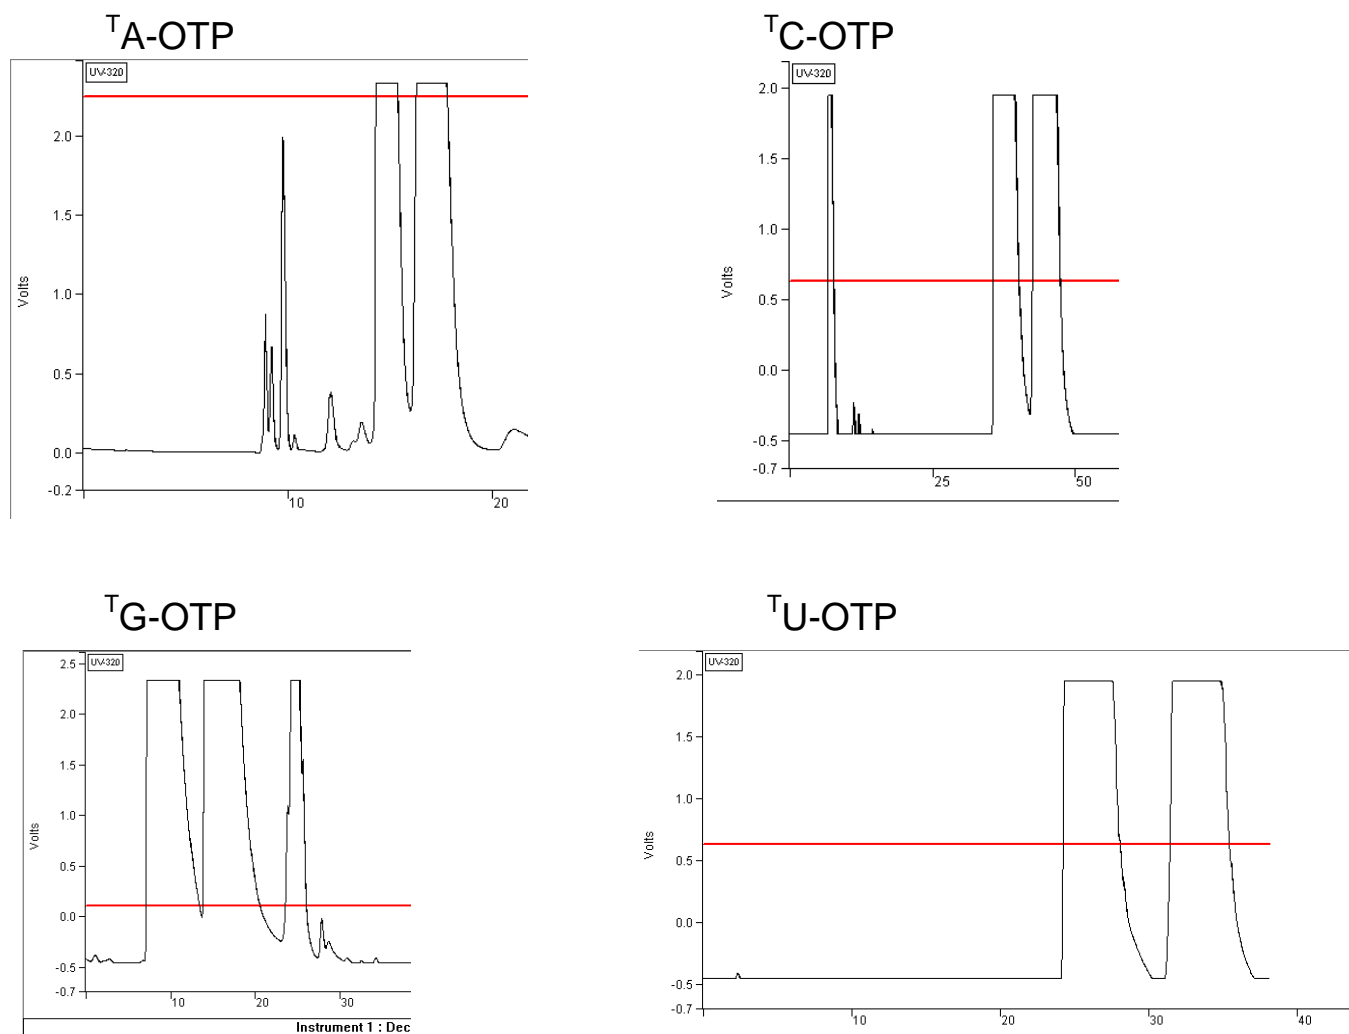

**Figure S1b.** HPLC profiles recorded for semi-preparative separation of the P-diastereomers of <sup>T</sup>A-OTP, <sup>T</sup>C-OTP, <sup>T</sup>G-OTP, and <sup>T</sup>U-OTP. The conditions were determined using a Phenomenex Luna 5  $\mu$ m Silica column (100 $\text{\AA}$ ; 250 $\times$ 10 mm; flow rate 5 mL/min). The UV detector was set at 275 nm. For each run, the column was loaded with 100-150 mg <sup>T</sup>N-OTP.

## HR MS spectra for separated P-diastereomers of <sup>M</sup>N-OTP and <sup>T</sup>N-OTP.

Figures S2a-h. HR MS spectra for separated P-diastereomers of <sup>M</sup>N-OTP (2a-d) recorded with a SYNAPT G2-Si High Definition Mass Spectrometer (qTOF, Electro Spray Ionization; Waters)

### Elemental Composition Report

Page 1

#### Single Mass Analysis

Tolerance = 5.0 PPM / DBE: min = -1.5, max = 70.0

Element prediction: Off

Number of isotope peaks used for i-FIT = 6

Monoisotopic Mass, Even Electron Ions

59 formula(e) evaluated with 1 results within limits (all results (up to 1000) for each mass)

Elements Used:

C: 0-50 H: 0-50 N: 0-5 O: 0-9 P: 1-1 S: 2-2

Jastrzebska

191211\_KJ\_AfA 35 (0.846) Cm (6:41)

TOF MS ES-  
2.75e+007

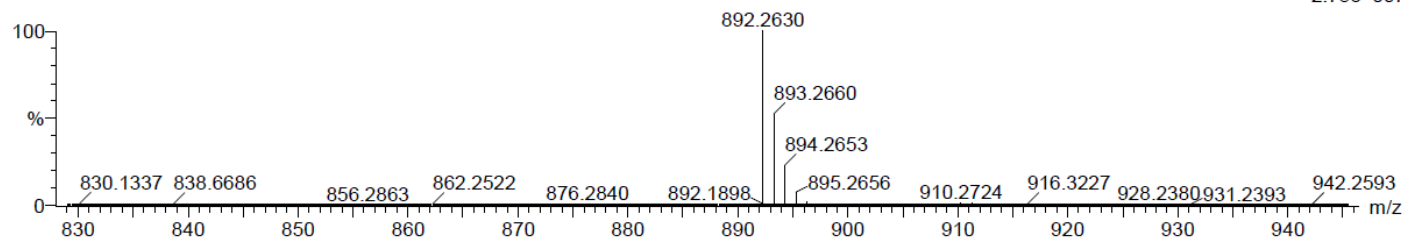

Minimum: -1.5  
Maximum: 5.0 5.0 70.0

| Mass     | Calc. Mass | mDa | PPM | DBE  | i-FIT  | Norm | Conf (%) | Formula            |
|----------|------------|-----|-----|------|--------|------|----------|--------------------|
| 892.2630 | 892.2604   | 2.6 | 2.9 | 26.5 | 2057.8 | n/a  | n/a      | C46 H47 N5 O8 P S2 |

2a: fast-eluting <sup>M</sup>A-OTP

## Elemental Composition Report

Page 1

### Single Mass Analysis

Tolerance = 5.0 PPM / DBE: min = -1.5, max = 70.0

Element prediction: Off

Number of isotope peaks used for i-FIT = 6

Monoisotopic Mass, Even Electron Ions

59 formula(e) evaluated with 1 results within limits (all results (up to 1000) for each mass)

Elements Used:

C: 0-50 H: 0-50 N: 0-5 O: 0-9 P: 1-1 S: 2-2

Jastrzebska

191211\_KJ\_As\_A 17 (0.423) Cm (3:39)

TOF MS ES-  
2.05e+007

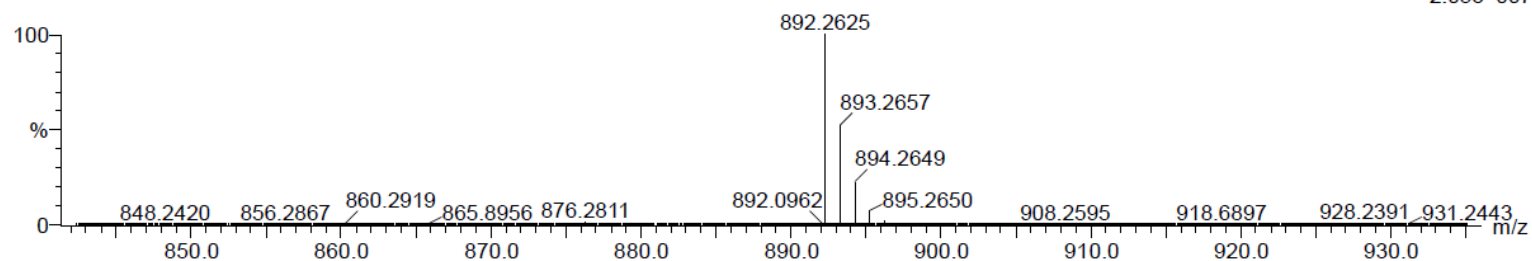

Minimum:

-1.5

Maximum:

5.0

5.0

70.0

| Mass | Calc. Mass | mDa | PPM | DBE | i-FIT | Norm | Conf (%) | Formula |
|------|------------|-----|-----|-----|-------|------|----------|---------|
|------|------------|-----|-----|-----|-------|------|----------|---------|

|          |          |     |     |      |        |     |     |                    |
|----------|----------|-----|-----|------|--------|-----|-----|--------------------|
| 892.2625 | 892.2604 | 2.1 | 2.4 | 26.5 | 1613.8 | n/a | n/a | C46 H47 N5 O8 P S2 |
|----------|----------|-----|-----|------|--------|-----|-----|--------------------|

2b: *slow*-eluting <sup>M</sup>A-OTP

## Elemental Composition Report

### Single Mass Analysis

Tolerance = 5.0 PPM / DBE: min = -1.5, max = 70.0

Element prediction: Off

Number of isotope peaks used for i-FIT = 6

Monoisotopic Mass, Even Electron Ions

83 formula(e) evaluated with 2 results within limits (all results (up to 1000) for each mass)

Elements Used:

C: 0-50 H: 0-50 N: 0-5 O: 0-9 P: 1-1 S: 2-2

Jastrzebska

191211\_KJ\_Cf\_A 3 (0.087) Cm (3:41)

TOF MS ES-  
1.74e+007

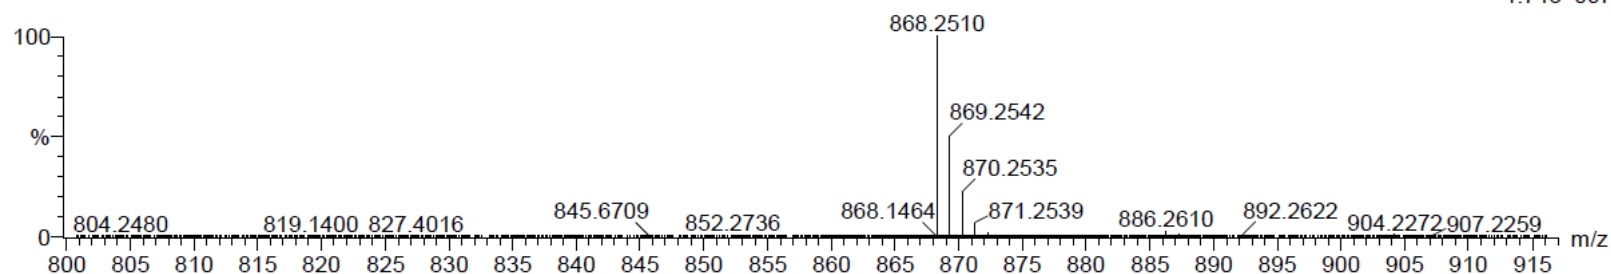

Minimum: -1.5  
Maximum: 5.0 5.0 70.0

| Mass     | Calc. Mass | mDa  | PPM  | DBE  | i-FIT  | Norm  | Conf (%) | Formula            |
|----------|------------|------|------|------|--------|-------|----------|--------------------|
| 868.2510 | 868.2491   | 1.9  | 2.2  | 24.5 | 1432.4 | 0.049 | 95.22    | C45 H47 N3 O9 P S2 |
|          | 868.2532   | -2.2 | -2.5 | 28.5 | 1435.4 | 3.041 | 4.78     | C50 H47 N O7 P S2  |

2c: fast-eluting <sup>13</sup>C-OTP



## Elemental Composition Report

Page 1

### Single Mass Analysis

Tolerance = 5.0 PPM / DBE: min = -1.5, max = 70.0

Element prediction: Off

Number of isotope peaks used for i-FIT = 6

Monoisotopic Mass, Even Electron Ions

83 formula(e) evaluated with 2 results within limits (all results (up to 1000) for each mass)

Elements Used:

C: 0-50 H: 0-50 N: 0-5 O: 0-9 P: 1-1 S: 2-2

Jastrzebska

191211\_KJ\_Cs\_A 36 (0.863) Cm (36:41)

TOF MS ES-  
2.29e+006

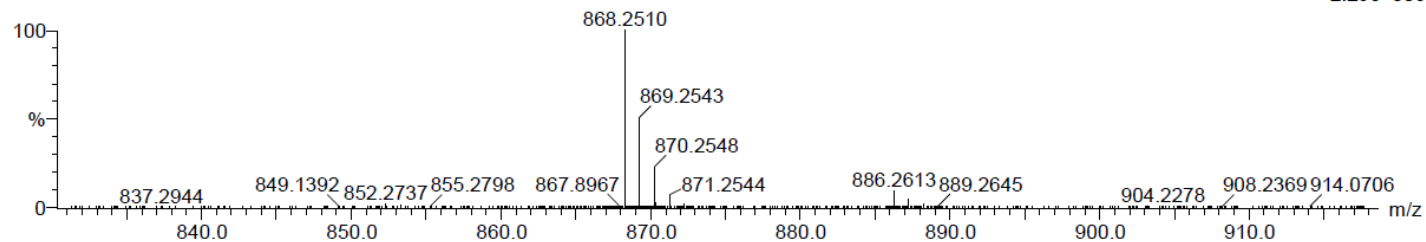

Minimum: -1.5  
Maximum: 5.0 5.0 70.0

| Mass     | Calc. Mass | mDa  | PPM  | DBE  | i-FIT  | Norm  | Conf(%) | Formula            |
|----------|------------|------|------|------|--------|-------|---------|--------------------|
| 868.2510 | 868.2491   | 1.9  | 2.2  | 24.5 | 1056.7 | 0.121 | 88.60   | C45 H47 N3 O9 P S2 |
|          | 868.2532   | -2.2 | -2.5 | 28.5 | 1058.8 | 2.171 | 11.40   | C50 H47 N O7 P S2  |

2d: slow-eluting <sup>13</sup>C-OTP

## Elemental Composition Report

Page 1

### Single Mass Analysis

Tolerance = 5.0 PPM / DBE: min = -1.5, max = 70.0

Element prediction: Off

Number of isotope peaks used for i-FIT = 9

Monoisotopic Mass, Even Electron Ions

147 formula(e) evaluated with 3 results within limits (all results (up to 1000) for each mass)

Elements Used:

C: 0-50 H: 0-55 N: 0-5 O: 0-9 P: 1-1 S: 1-2

Jastrzebska\_K

200123\_KJ\_Gf\_6 (0.158) Cm (3:41)

1: TOF MS ES-  
8.55e+007

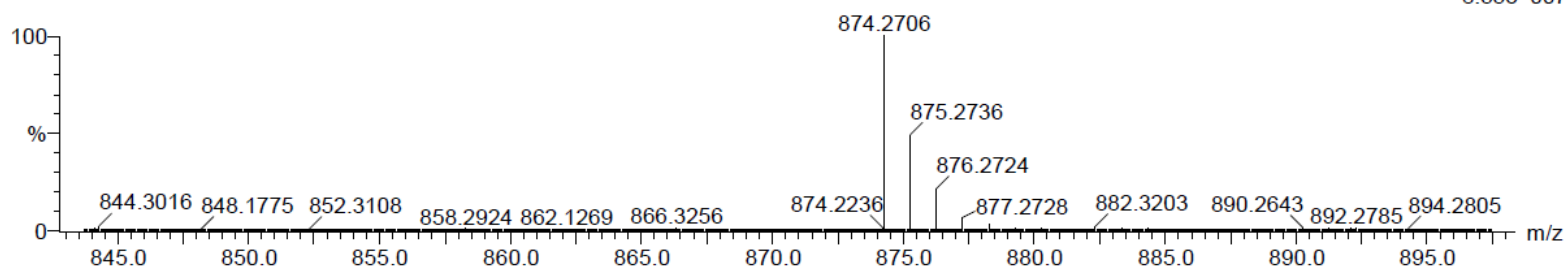

Minimum: -1.5  
Maximum: 5.0 5.0 70.0

| Mass     | Calc. Mass | mDa  | PPM  | DBE  | i-FIT  | Norm  | Conf (%) | Formula            |
|----------|------------|------|------|------|--------|-------|----------|--------------------|
| 874.2706 | 874.2709   | -0.3 | -0.3 | 22.5 | 4377.3 | 0.089 | 91.47    | C43 H49 N5 O9 P S2 |
|          | 874.2676   | 3.0  | 3.4  | 27.5 | 4382.8 | 5.610 | 0.37     | C46 H45 N5 O9 P S  |
|          | 874.2750   | -4.4 | -5.0 | 26.5 | 4379.7 | 2.506 | 8.16     | C48 H49 N3 O7 P S2 |

2e: fast-eluting <sup>M</sup>G-OTP

## Elemental Composition Report

Page 1

### Single Mass Analysis

Tolerance = 5.0 PPM / DBE: min = -1.5, max = 70.0

Element prediction: Off

Number of isotope peaks used for i-FIT = 9

Monoisotopic Mass, Even Electron Ions

147 formula(e) evaluated with 3 results within limits (all results (up to 1000) for each mass)

Elements Used:

C: 0-50 H: 0-55 N: 0-5 O: 0-9 P: 1-1 S: 1-2

Jastrzebska\_K

200123\_KJ\_GS\_40 (0.970) Cm (35:41)

1: TOF MS ES-  
1.30e+007

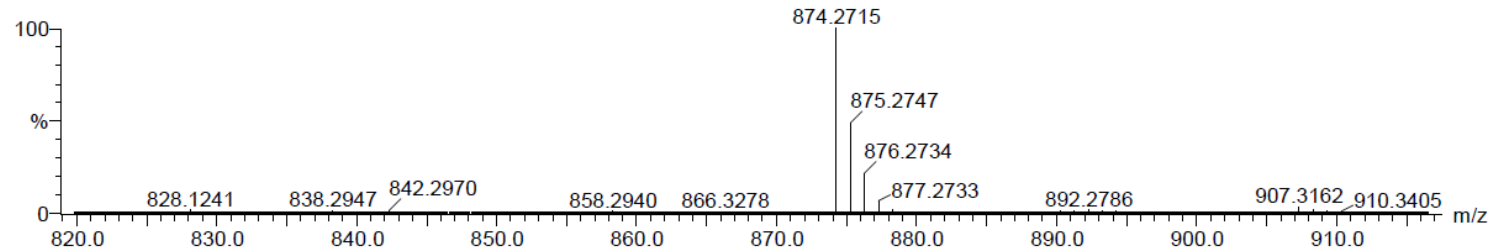

Minimum: -1.5  
Maximum: 5.0 5.0 70.0

| Mass     | Calc. Mass | mDa  | PPM  | DBE  | i-FIT  | Norm  | Conf (%) | Formula            |
|----------|------------|------|------|------|--------|-------|----------|--------------------|
| 874.2715 | 874.2709   | 0.6  | 0.7  | 22.5 | 3491.9 | 0.024 | 97.62    | C43 H49 N5 O9 P S2 |
|          | 874.2750   | -3.5 | -4.0 | 26.5 | 3497.4 | 5.559 | 0.39     | C48 H49 N3 O7 P S2 |
|          | 874.2676   | 3.9  | 4.5  | 27.5 | 3495.8 | 3.915 | 1.99     | C46 H45 N5 O9 P S  |

2f: slow-eluting <sup>M</sup>G-OTP

## Elemental Composition Report

Page 1

### Single Mass Analysis

Tolerance = 5.0 PPM / DBE: min = -1.5, max = 70.0

Element prediction: Off

Number of isotope peaks used for i-FIT = 6

Monoisotopic Mass, Even Electron Ions

230 formula(e) evaluated with 3 results within limits (all results (up to 1000) for each mass)

Elements Used:

C: 0-50 H: 0-50 N: 0-5 O: 0-9 P: 1-1 S: 2-2

Jastrzebska

191211\_KJ\_Uf\_A 4 (0.124) Cm (4:41)

TOF MS ES-  
5.36e+007

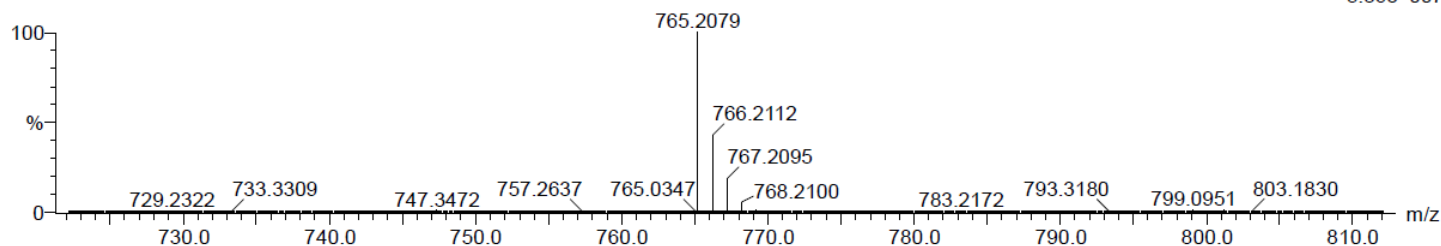

Minimum:

Maximum: 5.0 5.0 -1.5

| Mass | Calc. Mass | mDa | PPM | DBE | i-FIT | Norm | Conf (%) | Formula |
|------|------------|-----|-----|-----|-------|------|----------|---------|
|------|------------|-----|-----|-----|-------|------|----------|---------|

|          |          |      |      |      |        |        |       |                    |
|----------|----------|------|------|------|--------|--------|-------|--------------------|
| 765.2079 | 765.2069 | 1.0  | 1.3  | 19.5 | 1948.5 | 0.000  | 99.96 | C38 H42 N2 O9 P S2 |
|          | 765.2051 | 2.8  | 3.7  | 32.5 | 1958.6 | 10.099 | 0.00  | C50 H38 O2 P S2    |
|          | 765.2110 | -3.1 | -4.1 | 23.5 | 1956.4 | 7.876  | 0.04  | C43 H42 O7 P S2    |

2g: fast-eluting <sup>M</sup>U-OTP

## Elemental Composition Report

Page 1

### Single Mass Analysis

Tolerance = 5.0 PPM / DBE: min = -1.5, max = 70.0

Element prediction: Off

Number of isotope peaks used for i-FIT = 6

Monoisotopic Mass, Even Electron Ions

230 formula(e) evaluated with 3 results within limits (all results (up to 1000) for each mass)

Elements Used:

C: 0-50 H: 0-50 N: 0-5 O: 0-9 P: 1-1 S: 2-2

Jastrzebska

191211\_KJ\_Us\_A 17 (0.423) Cm (3:41)

TOF MS ES-  
1.05e+008

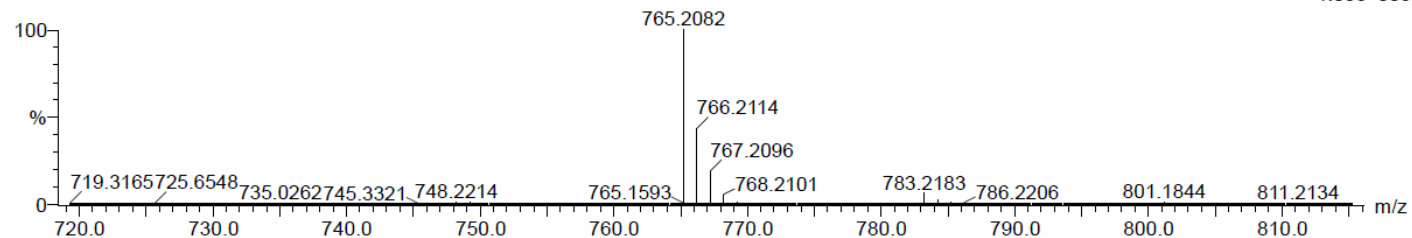

Minimum: -1.5  
Maximum: 5.0 5.0 70.0

| Mass     | Calc. Mass | mDa  | PPM  | DBE  | i-FIT  | Norm   | Conf(%) | Formula            |
|----------|------------|------|------|------|--------|--------|---------|--------------------|
| 765.2082 | 765.2069   | 1.3  | 1.7  | 19.5 | 2610.0 | 0.000  | 99.98   | C38 H42 N2 O9 P S2 |
|          | 765.2110   | -2.8 | -3.7 | 23.5 | 2618.4 | 8.404  | 0.02    | C43 H42 O7 P S2    |
|          | 765.2051   | 3.1  | 4.1  | 32.5 | 2621.8 | 11.735 | 0.00    | C50 H38 O2 P S2    |

2h: slow-eluting <sup>M</sup>U-OTP

**Figure S3a-h. HR MS spectra for separated P-diastereomers of <sup>T</sup>N-OTP (3a-d) recorded with a SYNAPT G2-Si High Definition Mass Spectrometer (qTOF, Electro Spray Ionization; Waters)**

**Elemental Composition Report**

Page 1

**Single Mass Analysis**

Tolerance = 5.0 PPM / DBE: min = -1.5, max = 70.0

Element prediction: Off

Number of isotope peaks used for i-FIT = 9

Monoisotopic Mass, Even Electron Ions

516 formula(e) evaluated with 4 results within limits (all results (up to 1000) for each mass)

Elements Used:

C: 0-60 H: 0-80 N: 0-5 O: 0-11 Si: 1-1 P: 1-1 S: 1-2

200526\_KJ\_Af\_newA 4 (0.124) Cm (4:41)

TOF MS ES-  
3.55e+006

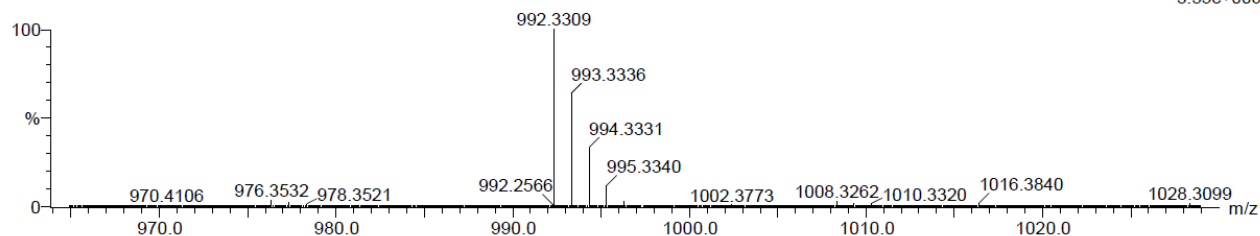

Minimum: -1.5  
Maximum: 5.0 5.0 70.0

| Mass     | Calc. Mass | mDa  | PPM  | DBE  | i-FIT  | Norm  | Conf (%) | Formula               |
|----------|------------|------|------|------|--------|-------|----------|-----------------------|
| 992.3309 | 992.3312   | -0.3 | -0.3 | 26.5 | 2504.9 | 4.702 | 0.91     | C51 H59 N5 O8 Si P S2 |
|          | 992.3318   | -0.9 | -0.9 | 35.5 | 2501.4 | 1.251 | 28.63    | C59 H55 N3 O6 Si P S  |
|          | 992.3278   | 3.1  | 3.1  | 31.5 | 2500.5 | 0.356 | 70.03    | C54 H55 N5 O8 Si P S  |
|          | 992.3352   | -4.3 | -4.3 | 30.5 | 2505.6 | 5.440 | 0.43     | C56 H59 N3 O6 Si P S2 |

3a: fast-eluting <sup>T</sup>A-OTP

## Elemental Composition Report

Page 1

### Single Mass Analysis

Tolerance = 5.0 PPM / DBE: min = -1.5, max = 70.0

Element prediction: Off

Number of isotope peaks used for i-FIT = 9

Monoisotopic Mass, Even Electron Ions

516 formula(e) evaluated with 4 results within limits (all results (up to 1000) for each mass)

Elements Used:

C: 0-60 H: 0-80 N: 0-5 O: 0-11 Si: 1-1 P: 1-1 S: 1-2

200526\_KJ\_As\_new\_A.4 (0.124) Cm (3:40)

TOF MS ES-  
1.89e+007

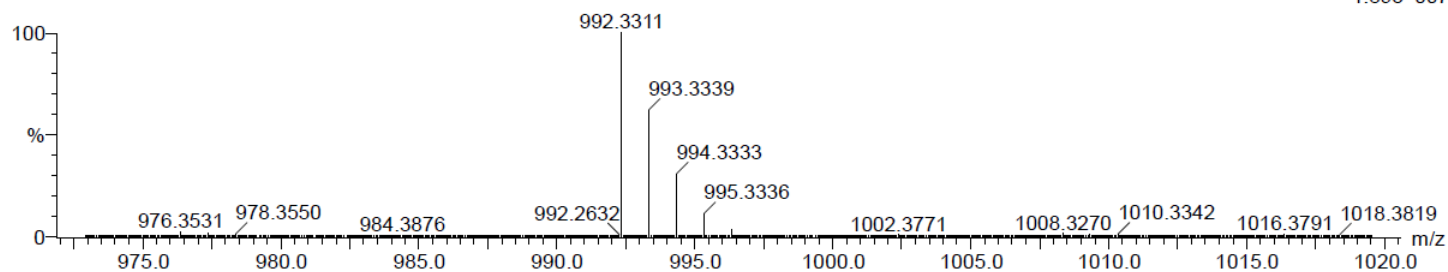

Minimum: -1.5  
Maximum: 5.0 5.0 70.0

| Mass     | Calc. Mass | mDa  | PPM  | DBE  | i-FIT  | Norm  | Conf (%) | Formula               |
|----------|------------|------|------|------|--------|-------|----------|-----------------------|
| 992.3311 | 992.3312   | -0.1 | -0.1 | 26.5 | 2974.0 | 5.985 | 0.25     | C51 H59 N5 O8 Si P S2 |
|          | 992.3318   | -0.7 | -0.7 | 35.5 | 2970.3 | 2.276 | 10.27    | C59 H55 N3 O6 Si P S  |
|          | 992.3278   | 3.3  | 3.3  | 31.5 | 2968.1 | 0.112 | 89.43    | C54 H55 N5 O8 Si P S  |
|          | 992.3352   | -4.1 | -4.1 | 30.5 | 2975.5 | 7.472 | 0.06     | C56 H59 N3 O6 Si P S2 |

3b: *slow-eluting* <sup>3</sup>A-OTP

## Elemental Composition Report

Page 1

### Single Mass Analysis

Tolerance = 5.0 PPM / DBE: min = -1.5, max = 70.0

Element prediction: Off

Number of isotope peaks used for i-FIT = 9

Monoisotopic Mass, Even Electron Ions

670 formula(e) evaluated with 1 results within limits (all results (up to 1000) for each mass)

Elements Used:

C: 0-50 H: 0-65 N: 0-5 O: 0-9 S: 0-2 P: 0-1 Si: 0-1

200429\_KJ\_CfA 22 (0.547) Cm (7:40)

TOF MS ES-  
4.22e+006

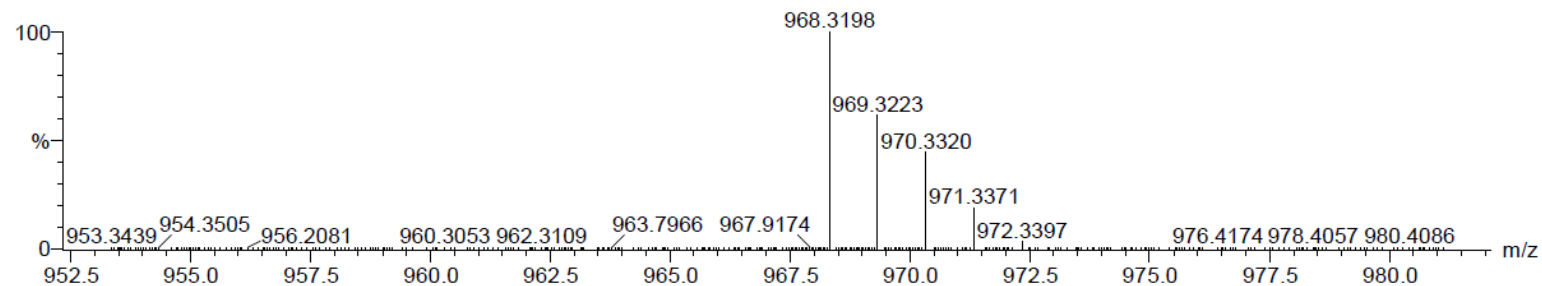

Minimum: -1.5  
Maximum: 5.0 5.0 70.0

| Mass     | Calc. Mass | mDa  | PPM  | DBE  | i-FIT  | Norm | Conf (%) | Formula               |
|----------|------------|------|------|------|--------|------|----------|-----------------------|
| 968.3198 | 968.3200   | -0.2 | -0.2 | 24.5 | 1275.5 | n/a  | n/a      | C50 H59 N3 O9 S2 P Si |

3c: fast-eluting <sup>13</sup>C-OTP



## Elemental Composition Report

Page 1

### Single Mass Analysis

Tolerance = 5.0 PPM / DBE: min = -1.5, max = 70.0

Element prediction: Off

Number of isotope peaks used for i-FIT = 9

Monoisotopic Mass, Even Electron Ions

670 formula(e) evaluated with 1 results within limits (all results (up to 1000) for each mass)

Elements Used:

C: 0-50 H: 0-65 N: 0-5 O: 0-9 Si: 0-1 P: 0-1 S: 0-2

200429\_KJ\_CsA 40 (0.970) Cm (6:41)

TOF MS ES-  
2.87e+006

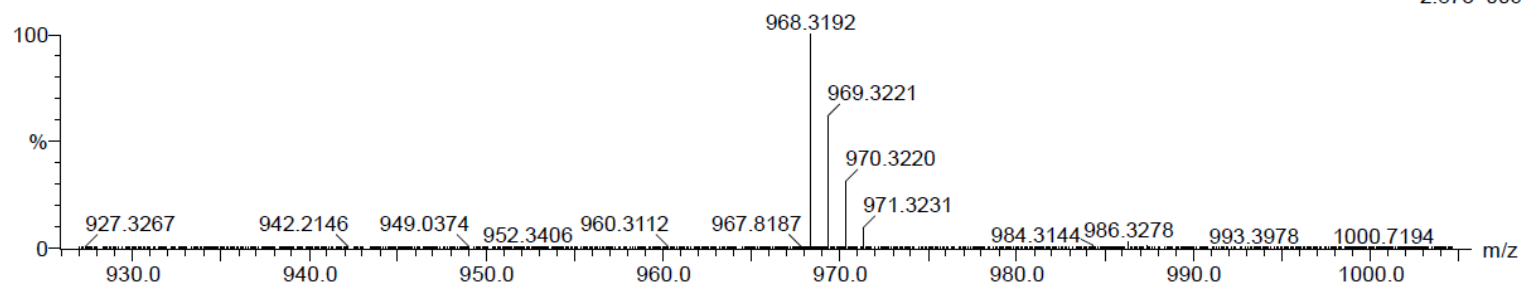

Minimum: -1.5  
Maximum: 5.0 5.0 70.0

| Mass     | Calc. Mass | mDa  | PPM  | DBE  | i-FIT  | Norm | Conf (%) | Formula               |
|----------|------------|------|------|------|--------|------|----------|-----------------------|
| 968.3192 | 968.3200   | -0.8 | -0.8 | 24.5 | 1157.4 | n/a  | n/a      | C50 H59 N3 O9 Si P S2 |

3d: slow-eluting <sup>13</sup>C-OTP

## Elemental Composition Report

Page 1

### Single Mass Analysis

Tolerance = 5.0 PPM / DBE: min = -1.5, max = 70.0

Element prediction: Off

Number of isotope peaks used for i-FIT = 9

Monoisotopic Mass, Even Electron Ions

666 formula(e) evaluated with 1 results within limits (all results (up to 1000) for each mass)

Elements Used:

C: 0-50 H: 0-65 N: 0-5 O: 0-9 Si: 0-1 P: 0-1 S: 0-2

200429\_KJ\_GfB 20 (0.493) Cm (3:39)

TOF MS ES-  
5.51e+007

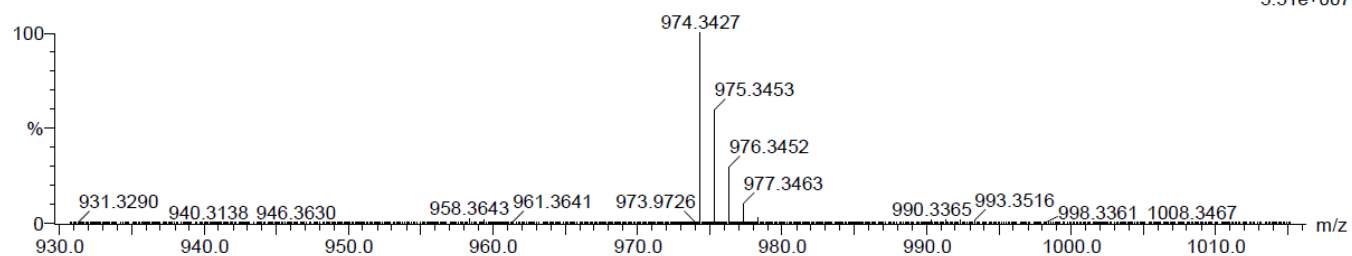

Minimum: -1.5  
Maximum: 5.0 5.0 70.0

| Mass     | Calc. Mass | mDa | PPM | DBE  | i-FIT  | Norm | Conf (%) | Formula               |
|----------|------------|-----|-----|------|--------|------|----------|-----------------------|
| 974.3427 | 974.3418   | 0.9 | 0.9 | 22.5 | 1995.9 | n/a  | n/a      | C48 H61 N5 O9 Si P S2 |

3e: fast-eluting <sup>T</sup>G-OTP

## Elemental Composition Report

Page 1

### Single Mass Analysis

Tolerance = 5.0 PPM / DBE: min = -1.5, max = 70.0

Element prediction: Off

Number of isotope peaks used for i-FIT = 9

Monoisotopic Mass, Even Electron Ions

666 formula(e) evaluated with 1 results within limits (all results (up to 1000) for each mass)

Elements Used:

C: 0-50 H: 0-65 N: 0-5 O: 0-9 S: 0-2 P: 0-1 Si: 0-1

200429\_KJ\_GsA 21 (0.510) Cm (7:39)

TOF MS ES-  
5.29e+007

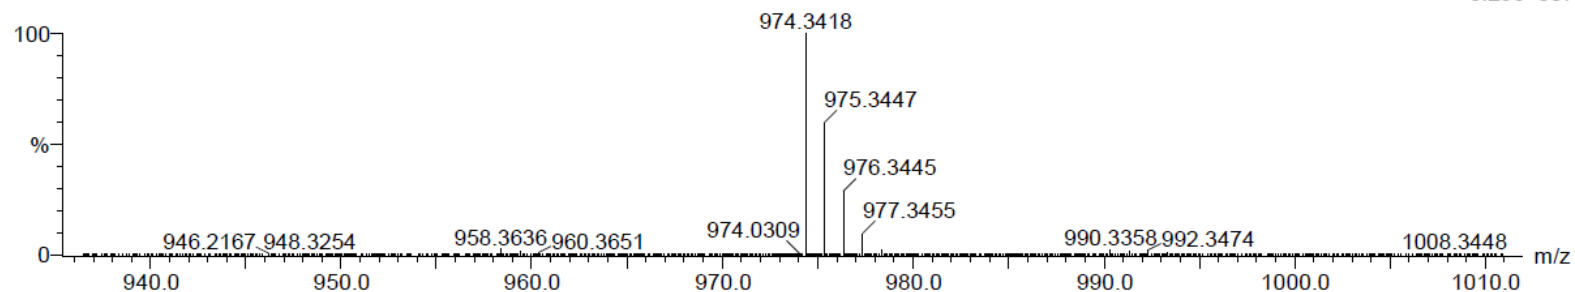

Minimum: -1.5  
Maximum: 5.0 5.0 70.0

| Mass     | Calc. Mass | mDa | PPM | DBE  | i-FIT  | Norm | Conf (%) | Formula               |
|----------|------------|-----|-----|------|--------|------|----------|-----------------------|
| 974.3418 | 974.3418   | 0.0 | 0.0 | 22.5 | 1865.0 | n/a  | n/a      | C48 H61 N5 O9 S2 P Si |

3f: *slow*-eluting <sup>T</sup>G-OTP

## Elemental Composition Report

Page 1

### Single Mass Analysis

Tolerance = 5.0 PPM / DBE: min = -1.5, max = 70.0

Element prediction: Off

Number of isotope peaks used for i-FIT = 9

Monoisotopic Mass, Even Electron Ions

1249 formula(e) evaluated with 5 results within limits (all results (up to 1000) for each mass)

Elements Used:

C: 0-50 H: 0-556 N: 0-3 O: 0-9 S: 0-2 P: 0-1 Si: 0-1

200429\_KJ\_UfA 20 (0.493) Cm (5:40)

TOF MS ES-  
2.04e+007

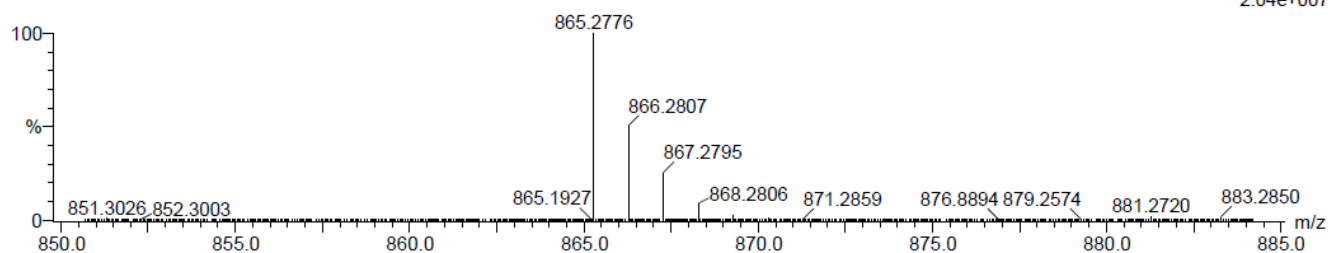

Minimum:

Maximum: 5.0 5.0 -1.5

70.0

| Mass     | Calc. Mass | mDa  | PPM  | DBE  | i-FIT  | Norm   | Conf(%) | Formula               |
|----------|------------|------|------|------|--------|--------|---------|-----------------------|
| 865.2776 | 865.2778   | -0.2 | -0.2 | 19.5 | 2679.7 | 5.793  | 0.30    | C43 H54 N2 O9 S2 P Si |
|          | 865.2801   | -2.5 | -2.9 | 28.5 | 2685.8 | 11.868 | 0.00    | C50 H49 N2 O6 S2 Si   |
|          | 865.2746   | 3.0  | 3.5  | 24.5 | 2674.0 | 0.058  | 94.37   | C47 H50 N2 O8 S2 P    |
|          | 865.2744   | 3.2  | 3.7  | 24.5 | 2676.9 | 2.933  | 5.32    | C46 H50 N2 O9 S P Si  |
|          | 865.2818   | -4.2 | -4.9 | 23.5 | 2683.8 | 9.892  | 0.01    | C48 H54 O7 S2 P Si    |

3g: fast-eluting <sup>3</sup>H-U-OTP

## Elemental Composition Report

Page 1

### Single Mass Analysis

Tolerance = 5.0 PPM / DBE: min = -1.5, max = 70.0

Element prediction: Off

Number of isotope peaks used for i-FIT = 9

Monoisotopic Mass, Even Electron Ions

1042 formula(e) evaluated with 6 results within limits (all results (up to 1000) for each mass)

Elements Used:

C: 0-50 H: 0-65 N: 0-5 O: 0-9 Si: 0-1 P: 0-1 S: 0-2

200429\_KJ\_UsA 38 (0.916) Cm (6:39)

TOF MS ES-  
2.38e+007

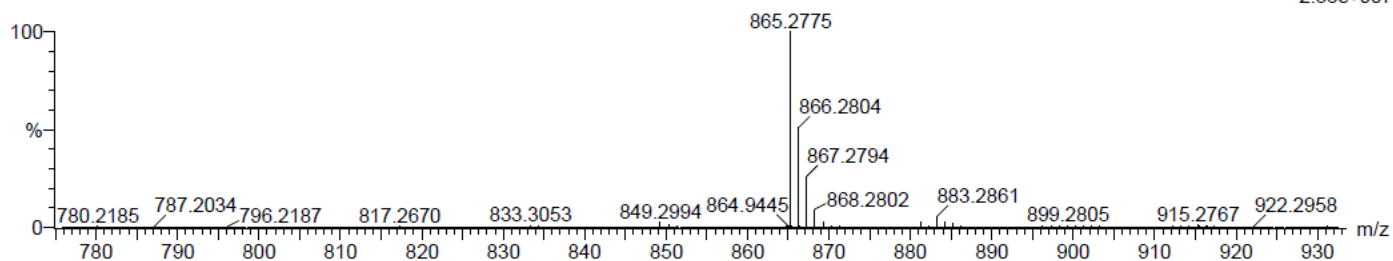

Minimum: -1.5  
Maximum: 5.0 5.0 70.0

| Mass     | Calc. Mass | mDa  | PPM  | DBE  | i-FIT  | Norm   | Conf (%) | Formula               |
|----------|------------|------|------|------|--------|--------|----------|-----------------------|
| 865.2775 | 865.2778   | -0.3 | -0.3 | 19.5 | 2672.4 | 2.614  | 7.32     | C43 H54 N2 O9 Si P S2 |
|          | 865.2761   | 1.4  | 1.6  | 24.5 | 2675.9 | 6.134  | 0.22     | C45 H49 N4 O8 Si S2   |
|          | 865.2801   | -2.6 | -3.0 | 28.5 | 2679.9 | 10.121 | 0.00     | C50 H49 N2 O6 Si S2   |
|          | 865.2746   | 2.9  | 3.4  | 24.5 | 2669.9 | 0.110  | 89.56    | C47 H50 N2 O8 P S2    |
|          | 865.2744   | 3.1  | 3.6  | 24.5 | 2673.4 | 3.555  | 2.86     | C46 H50 N2 O9 Si P S  |
|          | 865.2818   | -4.3 | -5.0 | 23.5 | 2677.7 | 7.859  | 0.04     | C48 H54 O7 Si P S2    |

3h: slow-eluting <sup>3</sup>H-U-OTP

**$^1\text{H}$  NMR spectra for separated P-diastereomers of  $^{\text{M}}\text{N}$ -OTP and  $^{\text{T}}\text{N}$ -OTP monomers.**

**Figure S4.  $^1\text{H}$  NMR spectra for separated P-diastereomers of  $^{\text{M}}\text{N}$ -OTP and  $^{\text{T}}\text{N}$ -OTP monomers, recorded with a Bruker AV-500 spectrometer (500 MHz)**

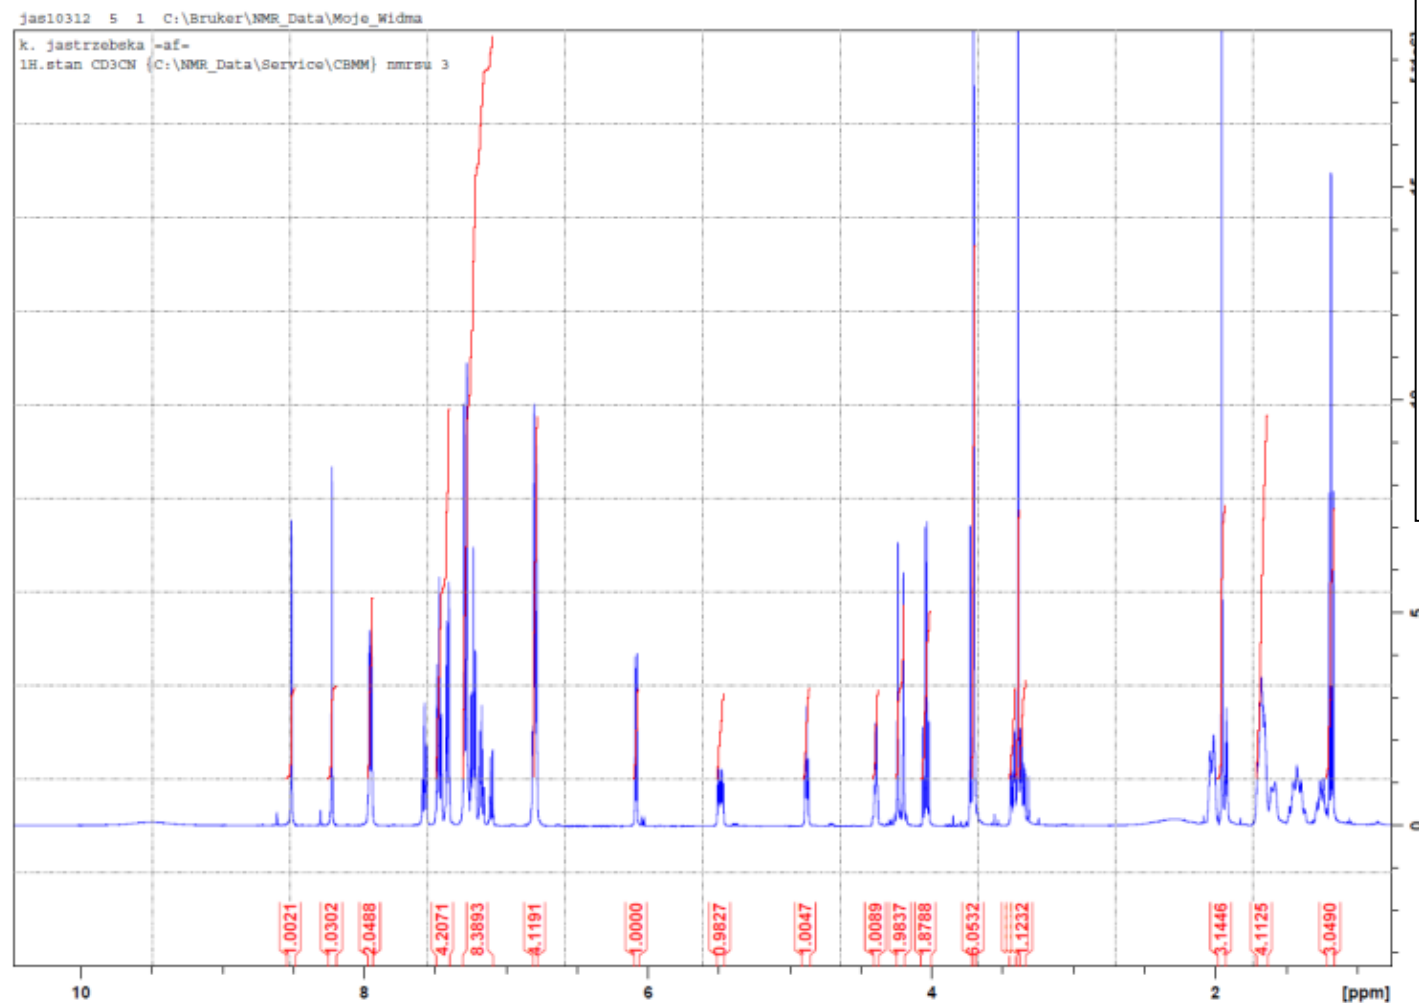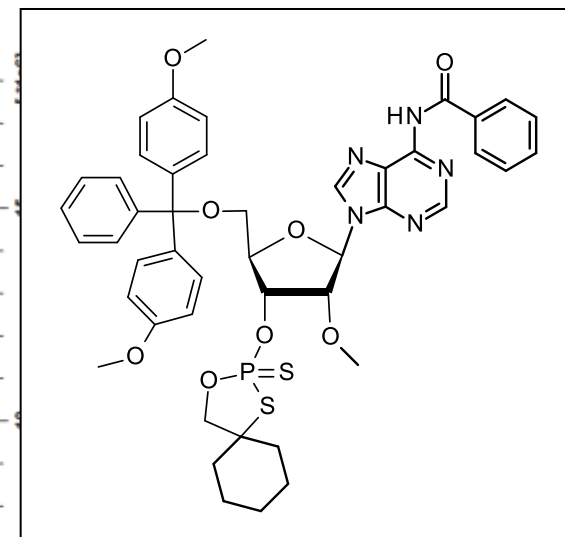

Fast-eluting<sup>M</sup>A-OTP in CD<sub>3</sub>CN; δ (ppm)

<sup>1</sup>H NMR: 9.50 (1H, NHCO), 8.51 (1H, C8-H), 8.23 (1H, C2-H), 7.58-6.79 (18H, DMT, Bz), 6.09-6.08 (1H, C1'-H), 5.51-5.47 (1H, C3'-H), 4.89-4.87 (1H, C2'-H), 4.40-4.39 (1H, C4'-H), 4.24-4.20 (2H, P-O-CH<sub>2</sub>C-S), 3.71 (6H, 2xOCH<sub>3</sub>), 3.39 (3H, 2'OCH<sub>3</sub>), 3.45-3.34 (2H, 5'CH<sub>2</sub>), 1.96-1.17 (10H, -(CH<sub>2</sub>)<sub>5</sub>-, „spiro”)

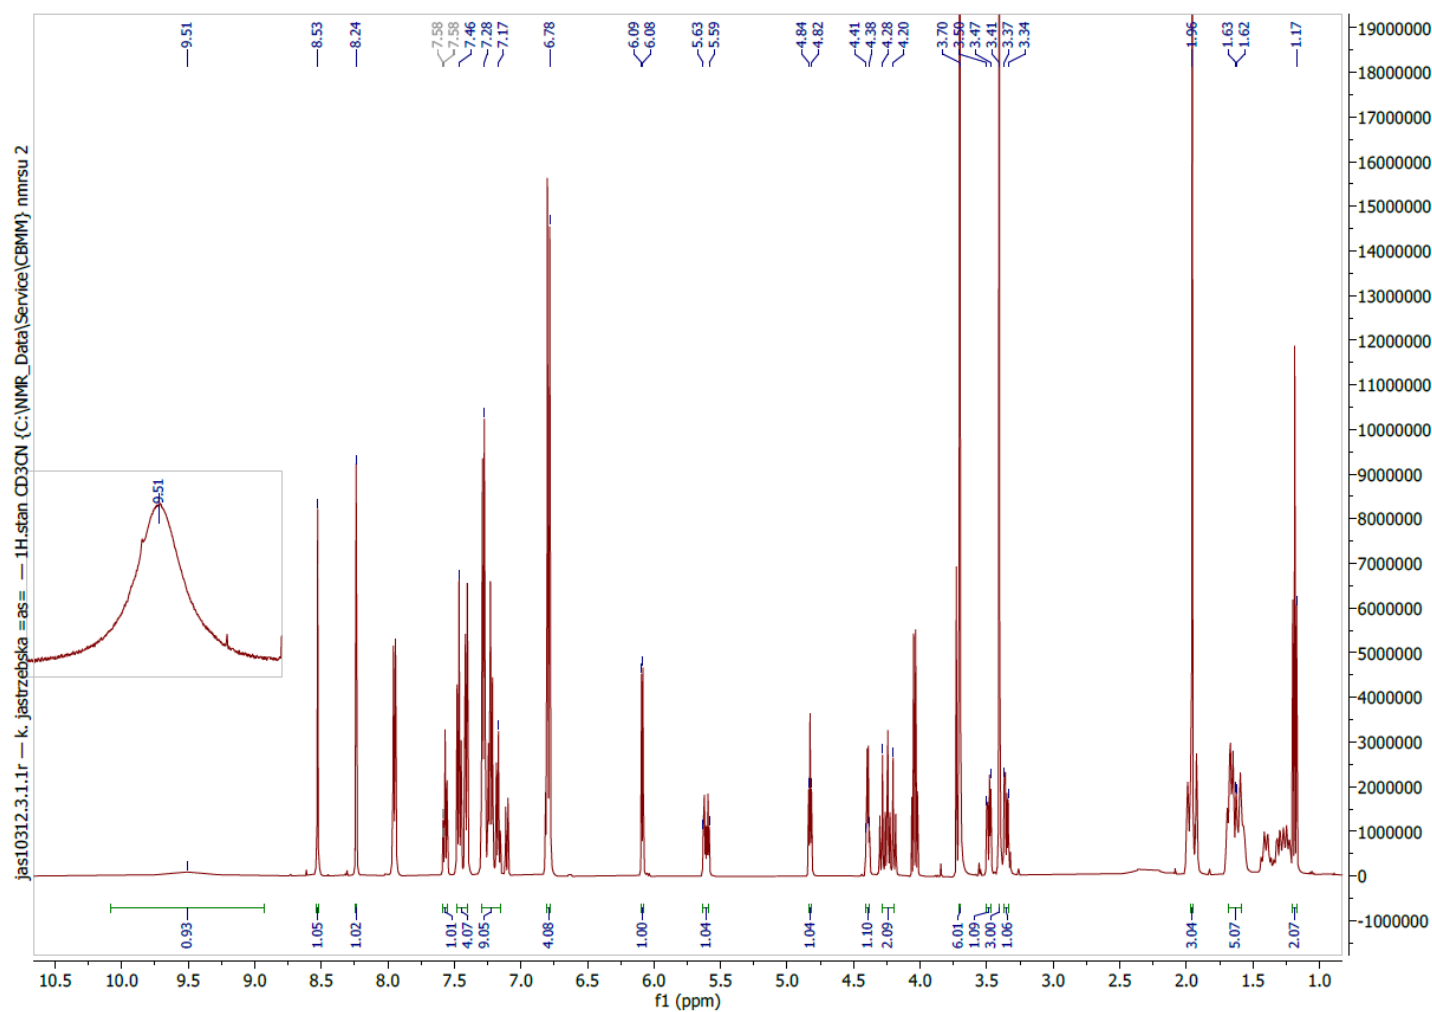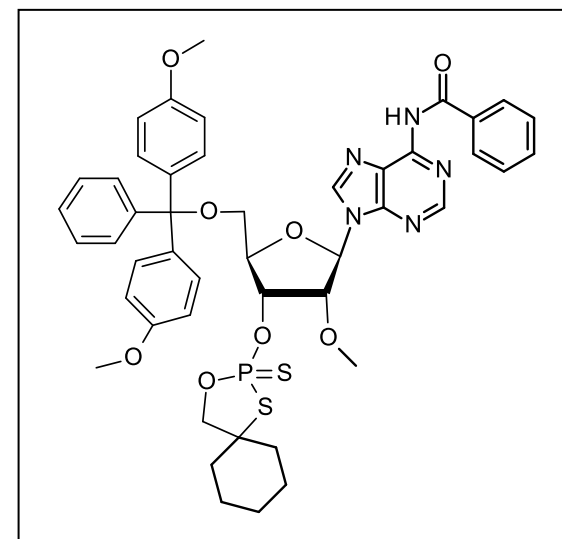

Slow-eluting<sup>M</sup>A-OTP in CD<sub>3</sub>CN; δ (ppm)

<sup>1</sup>H NMR: 9.51 (1H, NHCO), 8.53 (1H, C8-H), 8.24 (1H, C2-H), 7.59-6.78 (18H, DMT, Bz), 6.09-6.08 (1H, C1'-H), 5.63-5.59 (1H, C3'-H), 4.84-4.82 (1H, C2'-H), 4.41-4.38 (1H, C4'-H), 4.28-4.20 (2H, P-O-CH<sub>2</sub>C-S), 3.70 (6H, 2xOCH<sub>3</sub>), 3.41 (3H, 2'OCH<sub>3</sub>), 3.50-3.34 (2H, 5'CH<sub>2</sub>), 1.96-1.17 (10H, -(CH<sub>2</sub>)<sub>5</sub>- „spiro”)



k. jastrzebska = 1H.stan CD3CN {C:\NMR\_Data\Service\CBMM} nmrsu 1  
KJ-OTP C2'OMe\_fast

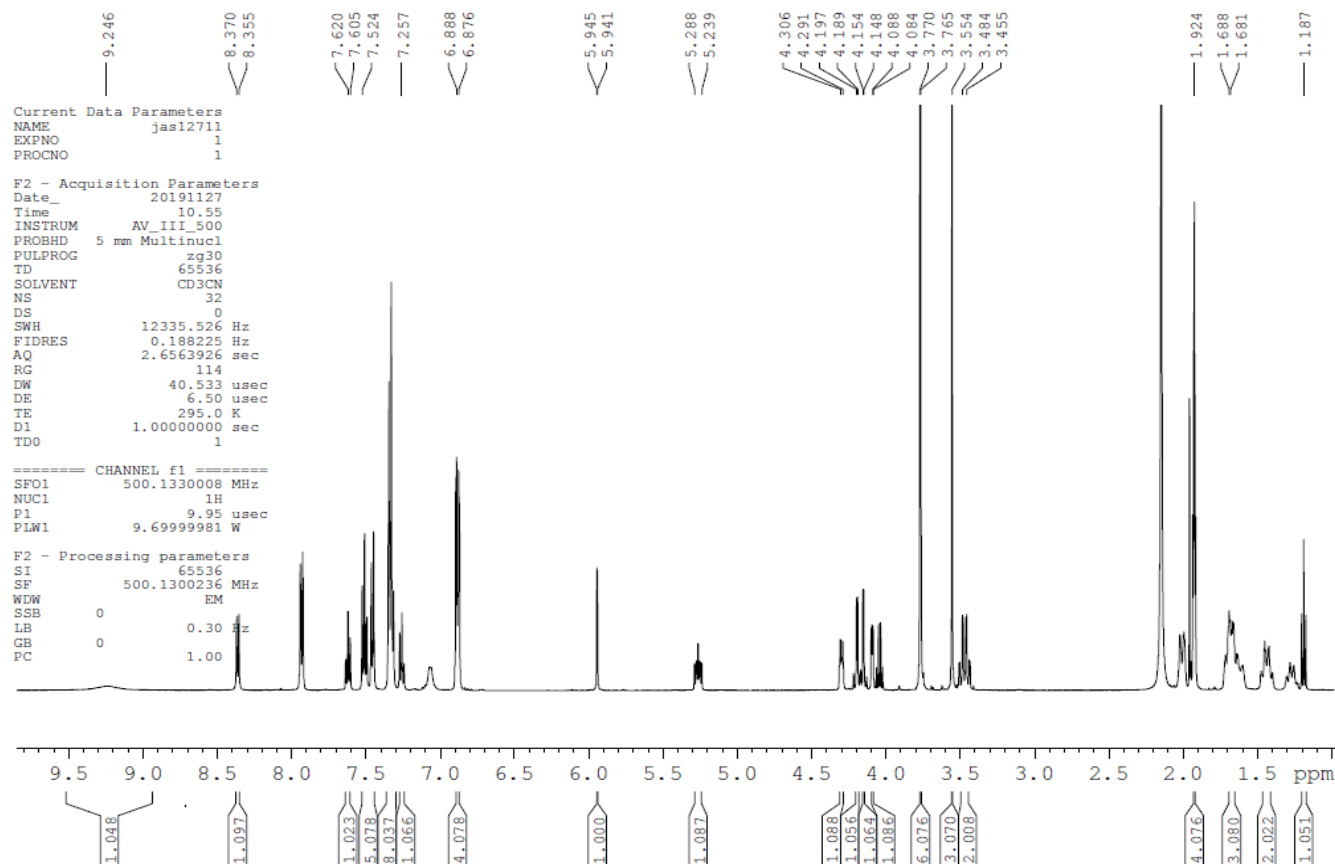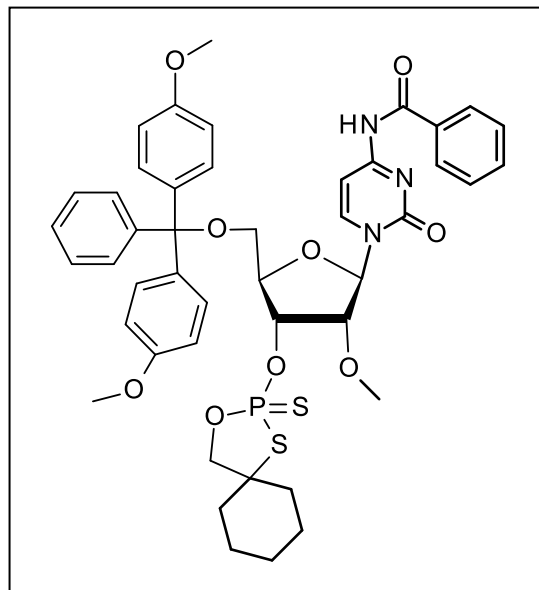

Fast-eluting <sup>13</sup>C-OTP in CD<sub>3</sub>CN; δ (ppm)

<sup>1</sup>H NMR: 9.25 (1H, NHCO), 8.37-8.35 (1H, C6-H), 7.62-7.60 (1H, C5-H), 7.52-6.88 (18H, DMT, Bz), 5.94 (1H, C1'-H), 5.29-5.24 (1H, C3'-H), 4.30-4.29 (1H, C2'-H), 4.20-4.19 (1H, C4'-H), 4.15-4.08 (2H, P-O-CH<sub>2</sub>C-S), 3.77 (6H, 2xOCH<sub>3</sub>), 3.55 (3H, 2'OCH<sub>3</sub>), 3.48-3.46 (2H, 5'CH<sub>2</sub>), 1.92-1.19 (10H, -(CH<sub>2</sub>)<sub>5</sub>- „spiro”)

k. jastrzebska =kj-cs=  
 1H.stan CD3CN (C:\NMR\_Data\Service\CBMM) nmrsu 2  
 KJ-OTP C2'OMe\_slow

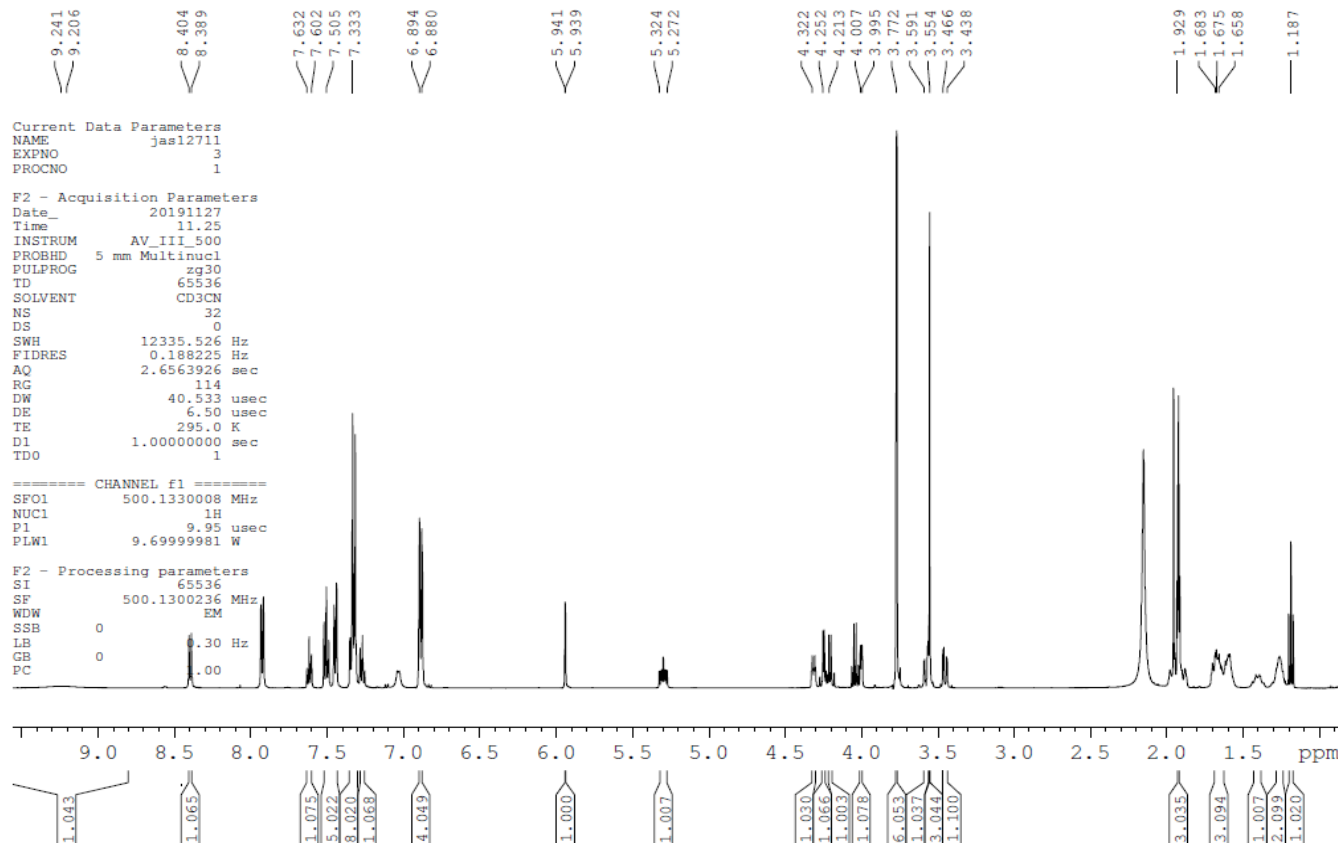

Slow-eluting <sup>13</sup>C-OTP in CD<sub>3</sub>CN; δ (ppm)

<sup>1</sup>H NMR: 9.24 (1H, NHCO), 8.40-8.39 (1H, C6-H), 7.63-7.60 (1H, C5-H), 7.50-6.88 (18H, DMT, Bz), 5.94 (1H, C1'-H), 5.32-5.27 (1H, C3'-H), 4.32-4.30 (1H, C2'-H), 4.26-4.25 (1H, C4'-H), 4.21-3.99 (2H, P-O-CH<sub>2</sub>C-S), 3.77 (6H, 2xOCH<sub>3</sub>), 3.55 (3H, 2'OCH<sub>3</sub>), 3.59-3.44 (2H, 5'CH<sub>2</sub>), 1.93-1.19 (10H, -(CH<sub>2</sub>)<sub>5</sub>- „spiro”)

k. jastrzebska =kj-321008f= 1H.stan  
 OTP G2'OMe\_fast

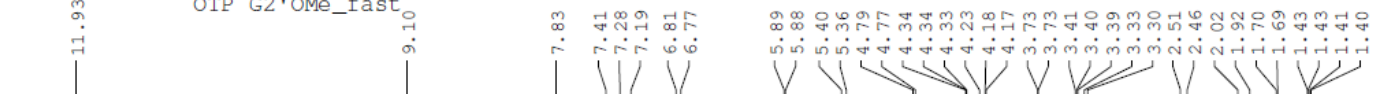

Current Data Parameters  
 NAME jas12009  
 EXPNO 1  
 PROCNO 1

F2 - Acquisition Parameters  
 Date\_ 20190920  
 Time 11.48  
 INSTRUM AV\_III\_500  
 PROBHD 5 mm Multinucl  
 PULPROG zg30  
 TD 65536  
 SOLVENT CD3CN  
 NS 32  
 DS 0  
 SWH 12335.526 Hz  
 FIDRES 0.188225 Hz  
 AQ 2.6563926 sec  
 RG 114  
 DW 40.533 usec  
 DE 6.50 usec  
 TE 295.0 K  
 D1 1.00000000 sec  
 TD0 1

===== CHANNEL f1 =====  
 SFO1 500.1330008 MHz  
 NUC1 1H  
 P1 9.95 usec  
 PLW1 9.69999981 W

F2 - Processing parameters  
 SI 65536  
 SF 500.1300236 MHz  
 WDW EM  
 SSB 0  
 LB 0.30 Hz  
 GB 0  
 PC 1.00

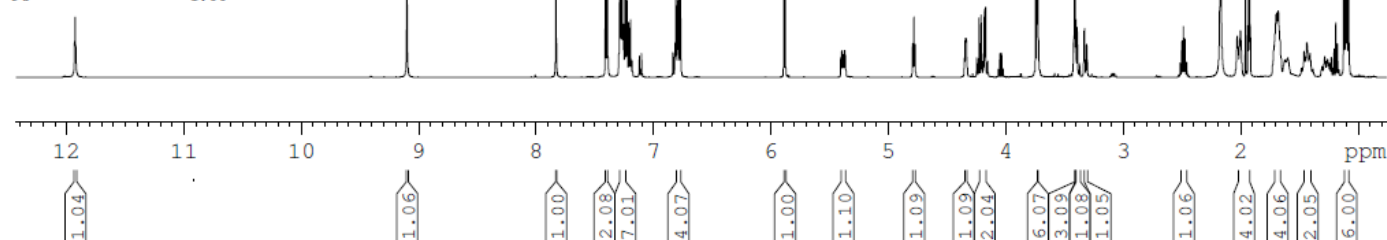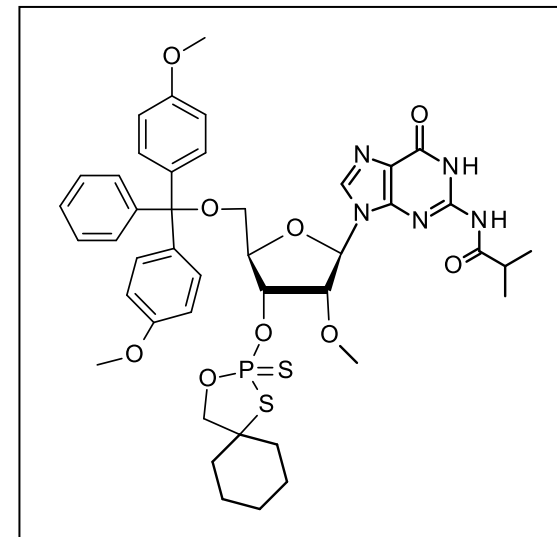

Fast-eluting <sup>M</sup>G-OTP in CD<sub>3</sub>CN; δ (ppm)

<sup>1</sup>H NMR: 11.93 (1H, N1-H), 9.10 (1H, N2-H), 7.83 (1H, C8-H), 7.40-6.77 (13H, DMT), 5.88-5.87 (1H, C1'-H), 5.40-5.36 (1H, C3'-H), 4.79-4.77 (1H, C2'-H), 4.34-4.33 (1H, C4'-H), 4.22-4.17 (2H, P-O-CH<sub>2</sub>C-S), 3.73 (6H, 2xOCH<sub>3</sub>), 3.41 (3H, 2'OCH<sub>3</sub>), 3.40-3.30 (2H, C5'CH<sub>2</sub>), 2.51-2.46 (1H, CH, iBu), 2.02-1.40 (10H, -(CH<sub>2</sub>)<sub>5</sub>- „spiro”), 1.12-1.08 (6H, 2xCH<sub>3</sub>, iBu)

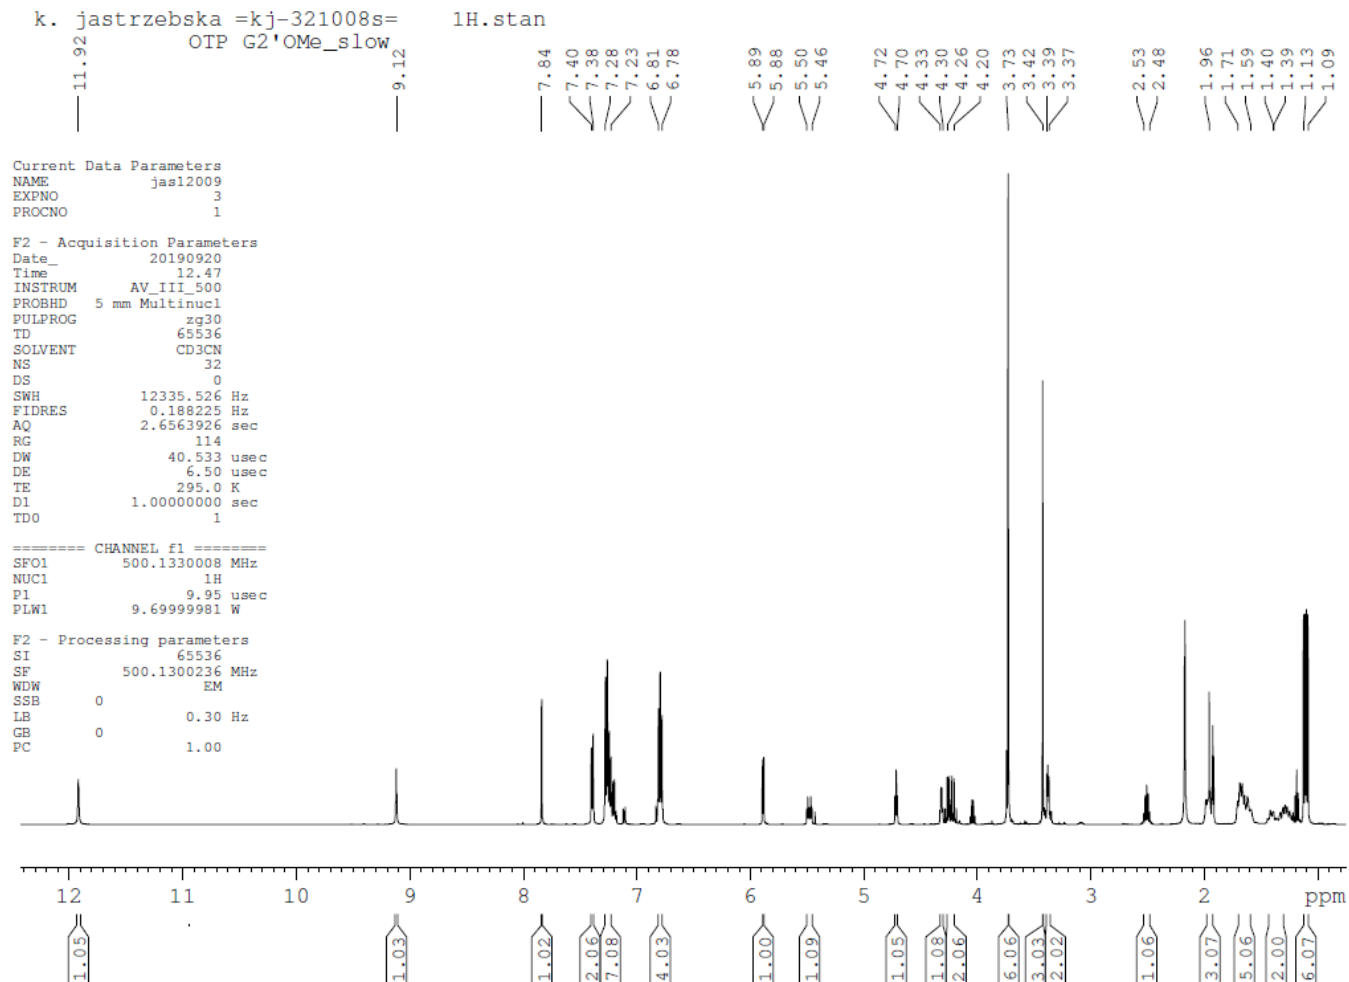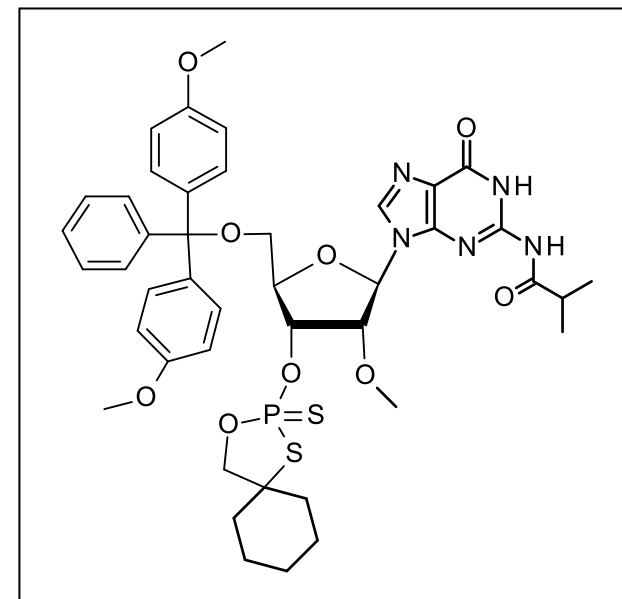

Slow-eluting  $^M\text{G}$ -OTP in  $\text{CD}_3\text{CN}$ ;  $\delta$  (ppm)

$^1\text{H}$  NMR: 11.92 (1H, N1-H), 9.12 (1H, N2-H), 7.84 (1H, C8-H), 7.40-6.78 (13H, DMT), 5.89-5.88 (1H, C1'-H), 5.50-5.46 (1H, C3'-H), 4.72-4.70 (1H, C2'-H), 4.32-4.30 (1H, C4'-H), 4.26-4.20 (2H, P-O-CH<sub>2</sub>C-S), 3.73 (6H, 2xOCH<sub>3</sub>), 3.42 (3H, 2'OCH<sub>3</sub>), 3.39-3.37 (2H, C5'CH<sub>2</sub>), 2.53-2.48 (1H, CH, iBu), 1.96-1.36 (10H, -(CH<sub>2</sub>)<sub>5</sub>- „spiro”), 1.12-1.09 (6H, 2xCH<sub>3</sub>, iBu)

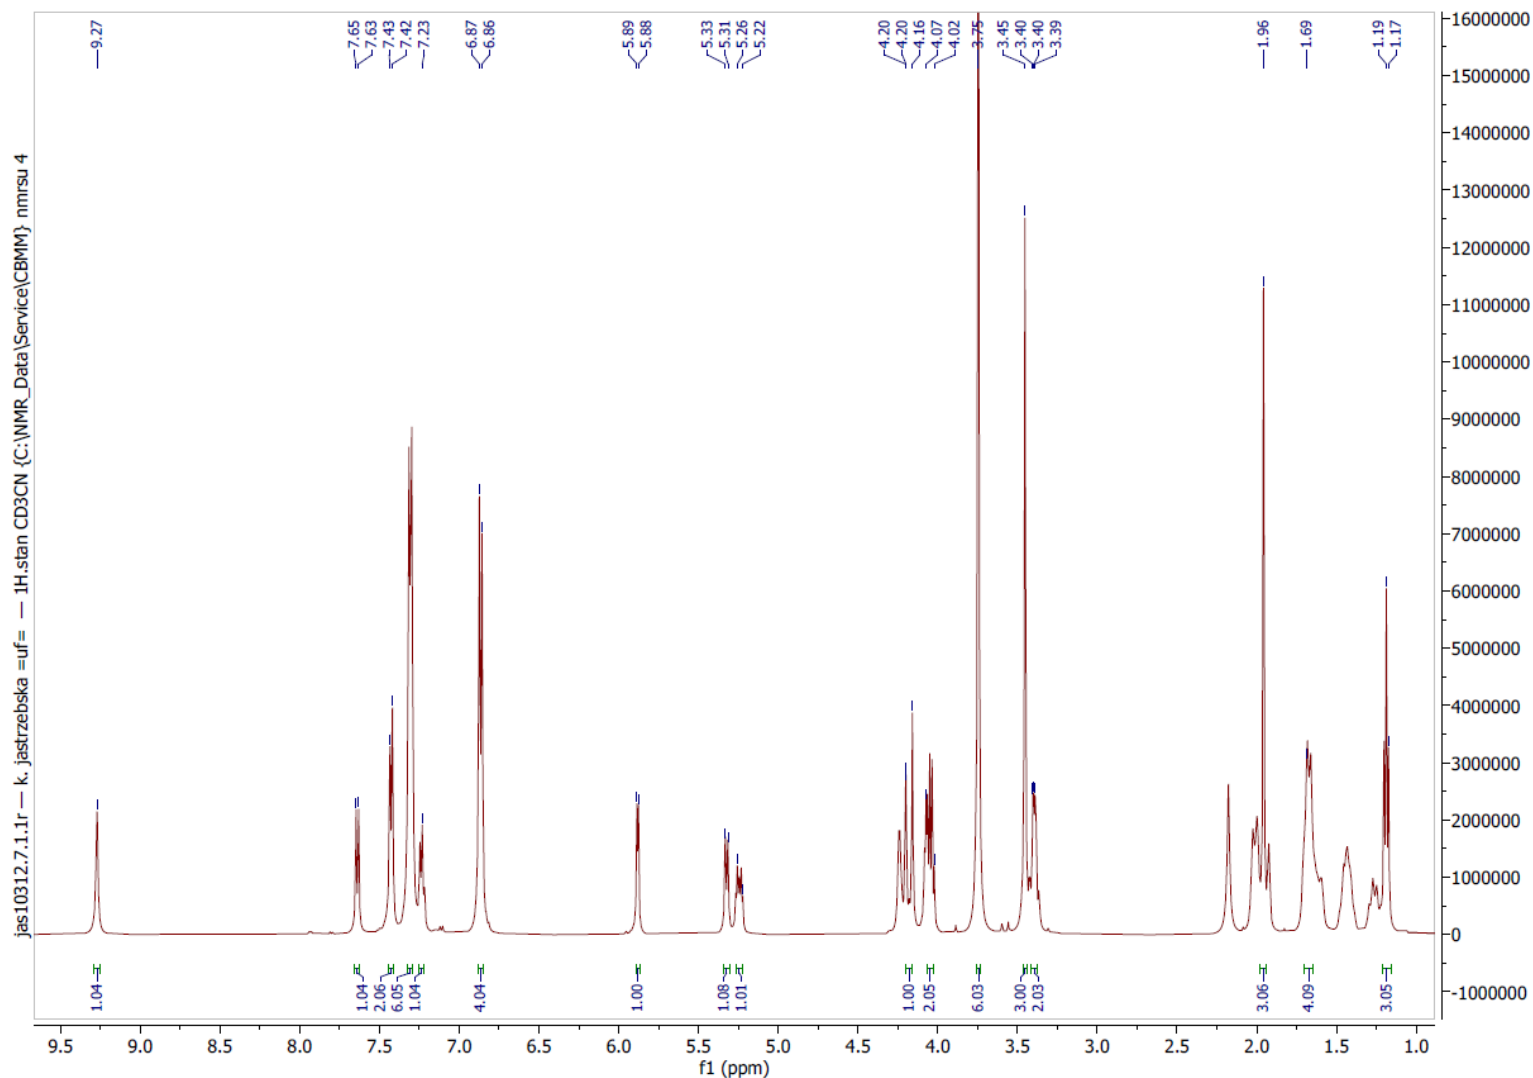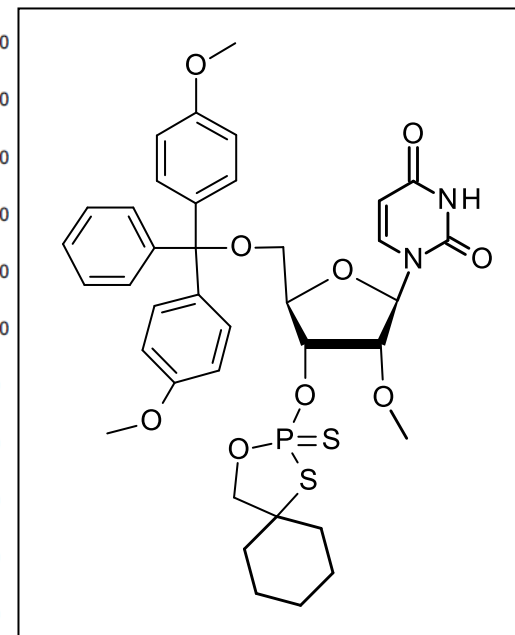

Fast-eluting <sup>M</sup>U-OTP in CD<sub>3</sub>CN; δ (ppm)

<sup>1</sup>H NMR: 9.27 (1H, N3-H), 7.65-7.63 (1H, C6-H), 7.43-6.86 (13H, DMT), 5.89-5.88 (1H, C1'-H), 5.33-5.31 (1H, C3'-H), 4.26-4.22 (1H, C2'-H), 4.20-4.16 (1H, C4'-H), 4.07-4.02 (2H, P-O-CH<sub>2</sub>C-S), 3.75 (6H, 2xOCH<sub>3</sub>), 3.45 (3H, 2'OCH<sub>3</sub>), 3.40-3.39 (2H, 5'CH<sub>2</sub>), 1.96-1.17 (10H, -(CH<sub>2</sub>)<sub>5</sub>-, „spiro”)

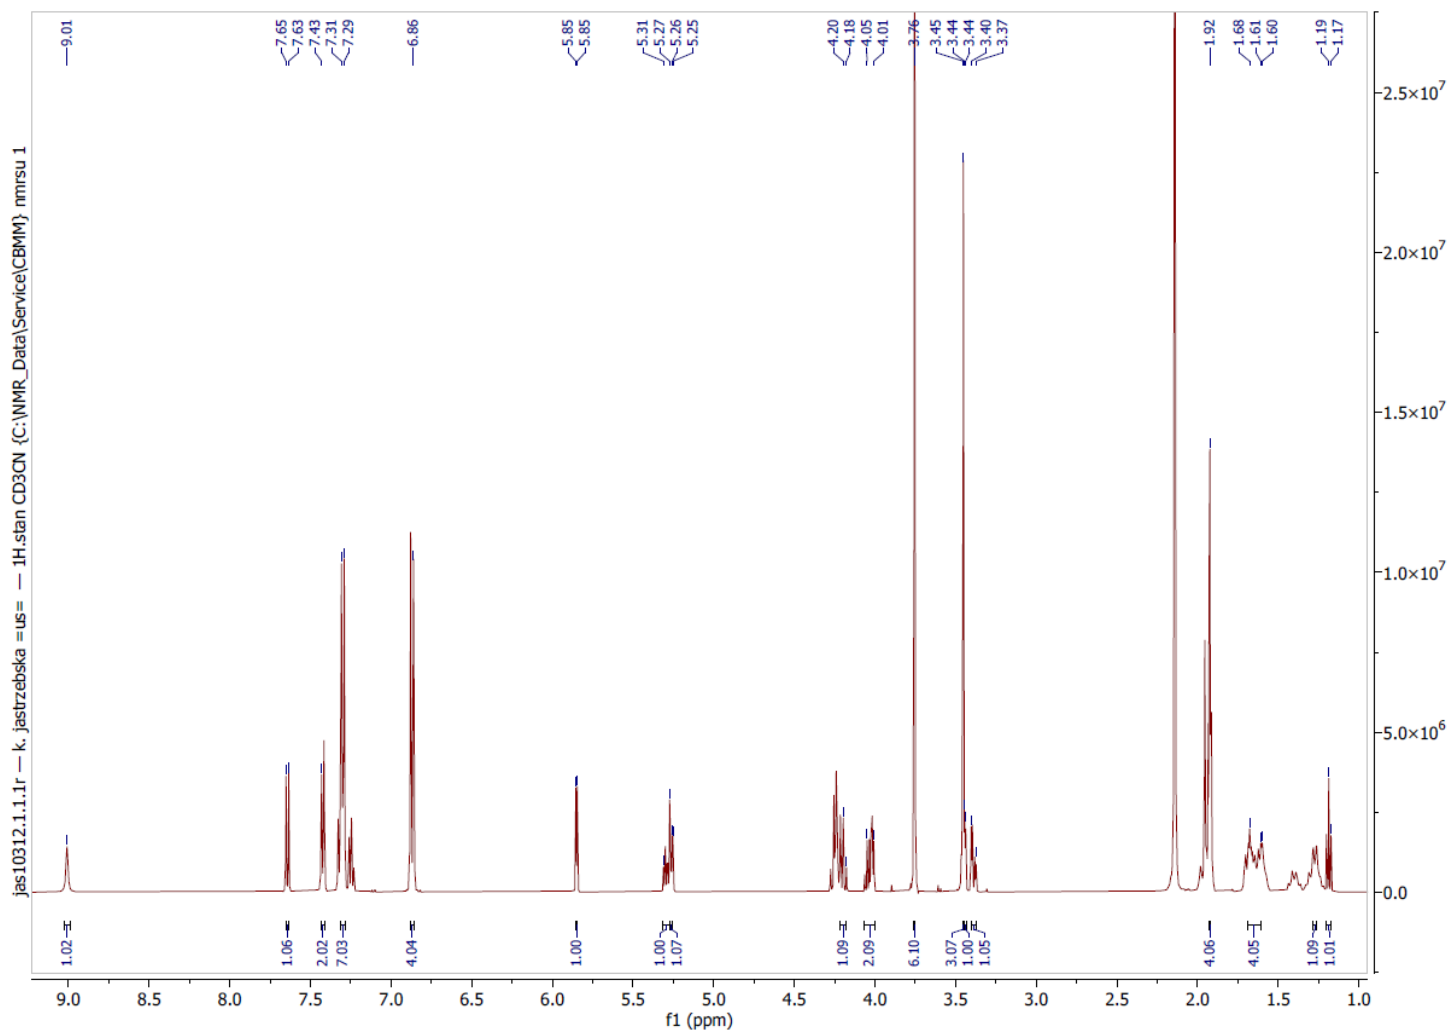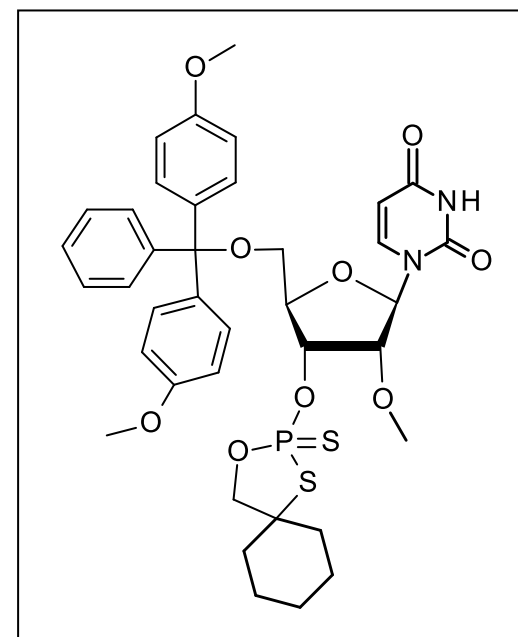

Slow-eluting <sup>M</sup>U-OTP in CD<sub>3</sub>CN; δ (ppm)

<sup>1</sup>H NMR: 9.01 (1H, N3-H), 7.65-7.63 (1H, C6-H), 7.43-6.86 (13H, DMT), 5.85 (1H, C1'-H), 5.31-5.28 (1H, C3'-H), 4.27-4.25 (1H, C2'-H), 4.20-4.18 (1H, C4'-H), 4.05-4.01 (2H, P-O-CH<sub>2</sub>C-S), 3.76 (6H, 2xOCH<sub>3</sub>), 3.45 (3H, 2'OCH<sub>3</sub>), 3.44-3.37 (2H, 5'CH<sub>2</sub>), 1.92-1.17 (10H, -(CH<sub>2</sub>)<sub>5</sub>-, "spiro")

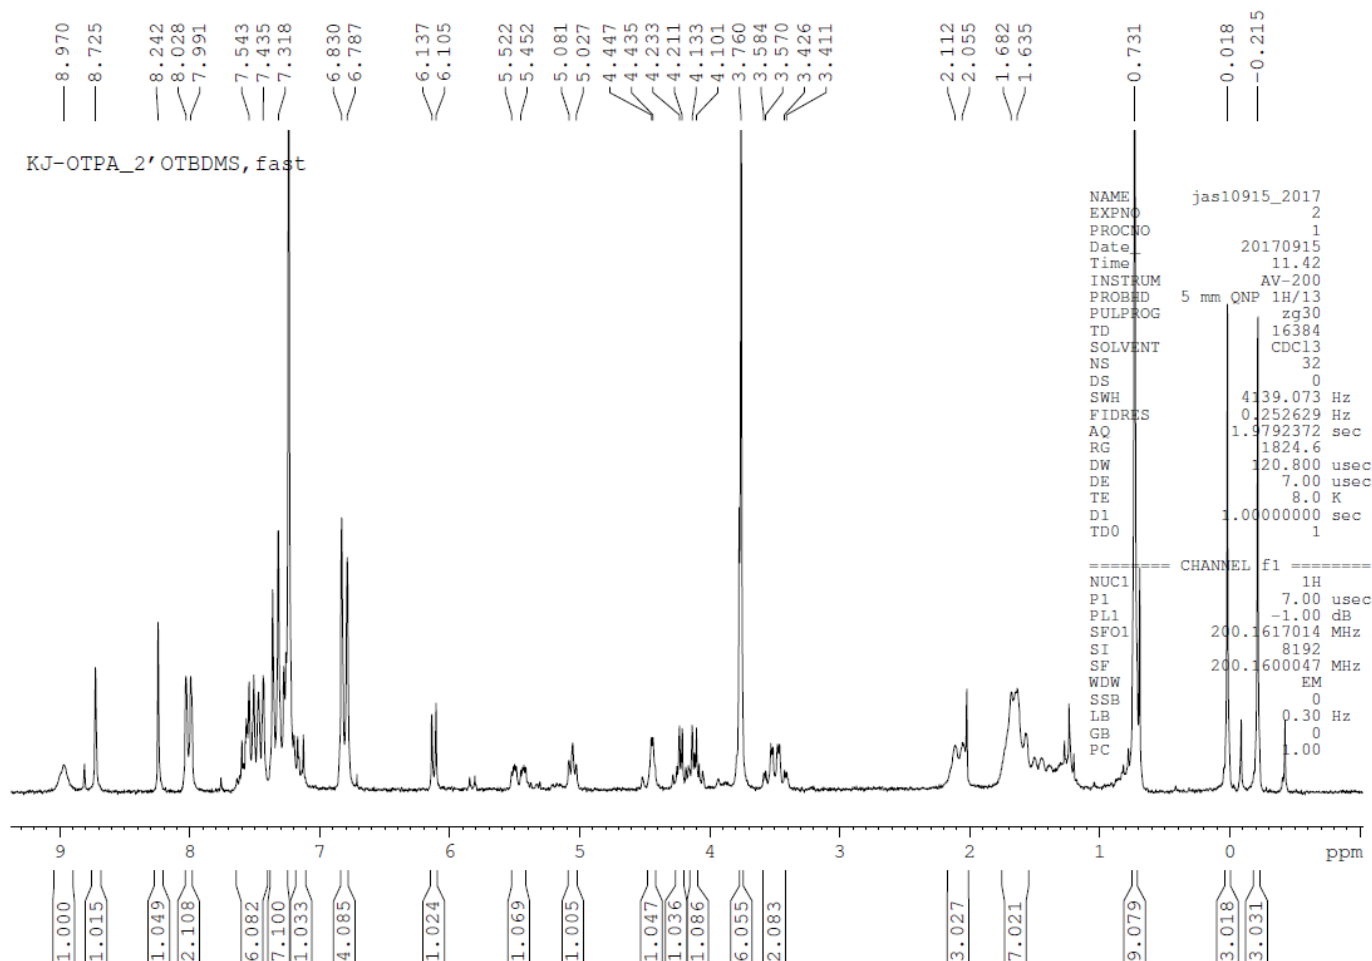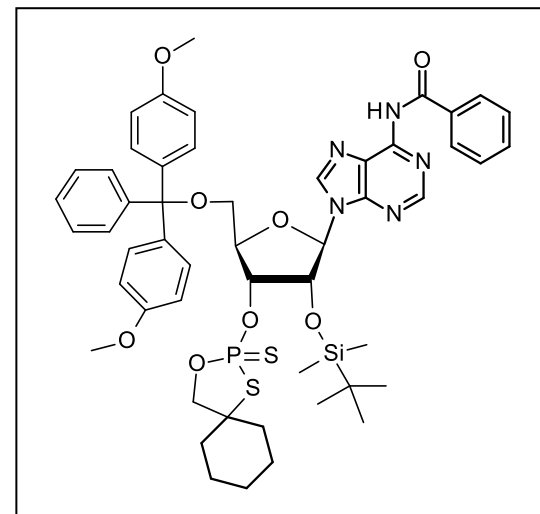

Fast-eluting <sup>1</sup>A-OTP in CD<sub>3</sub>CN; δ (ppm)

<sup>1</sup>H NMR: 8.97 (1H, NHCO), 8.73 (1H, C8-H), 8.24 (1H, C2-H), 7.54-6.79 (18H, DMT, Bz), 6.14-6.11 (1H, C1'-H), 5.52-5.45 (1H, C3'-H), 5.08-5.03 (1H, C2'-H), 4.45-4.44 (1H, C4'-H), 4.23-4.10 (2H, P-O-CH<sub>2</sub>C-S), 3.76 (6H, 2xOCH<sub>3</sub>), 3.58-3.41 (2H, 5'CH<sub>2</sub>), 2.11-1.63 (10H, -(CH<sub>2</sub>)<sub>5</sub>-, spiro), 0.73 (9H, 3xCH<sub>3</sub>, tert-Butyl), 0.02 (6H, 2xCH<sub>3</sub>, -(CH<sub>3</sub>)<sub>2</sub>Si)

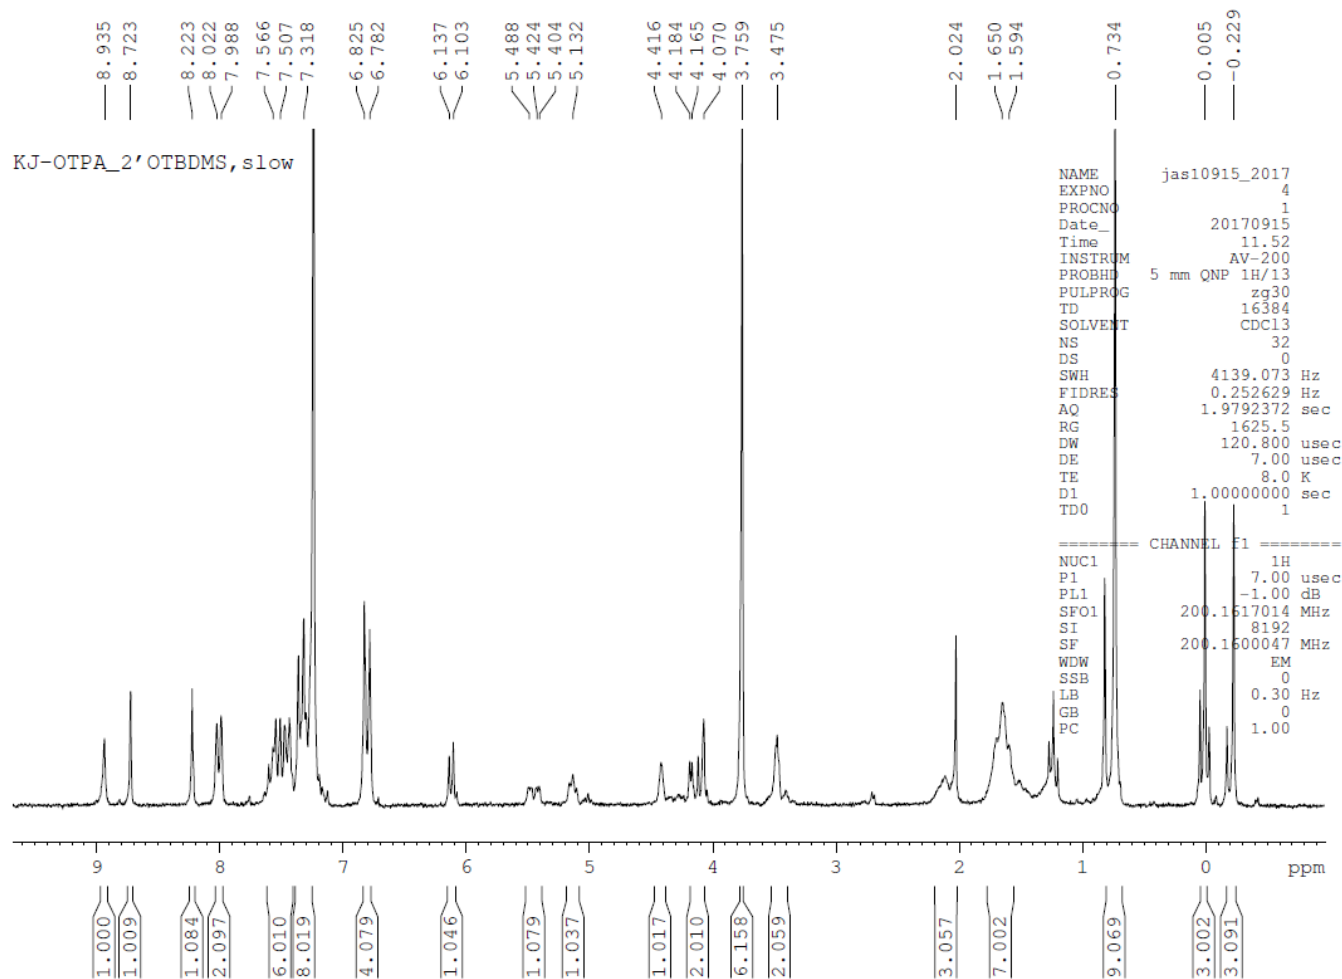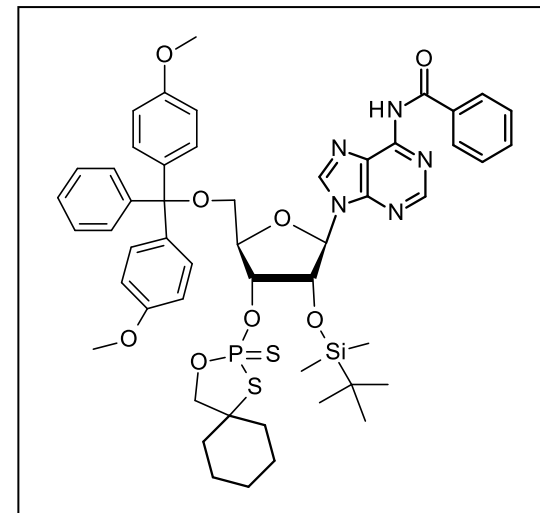

Slow-eluting <sup>1</sup>A-OTP in CD<sub>3</sub>CN; δ (ppm)

<sup>1</sup>H NMR: 8.94 (1H, NHCO), 8.72 (1H, C8-H), 8.22 (1H, C2-H), 7.57-6.78 (18H, DMT, Bz), 6.13-6.10 (1H, C1'-H), 5.49-5.40 (1H, C3'-H), 5.13 (1H, C2'-H), 4.42 (1H, C4'-H), 4.18-4.07 (2H, P-O-CH<sub>2</sub>C-S), 3.76 (6H, 2xOCH<sub>3</sub>), 3.47-3.45 (2H, 5'CH<sub>2</sub>), 2.02-1.59 (10H, -(CH<sub>2</sub>)<sub>5</sub>-„spiro”), 0.73 (9H, 3xCH<sub>3</sub>, tert-Butyl), 0.02 (6H, 2xCH<sub>3</sub>, -(CH<sub>3</sub>)<sub>2</sub>Si)



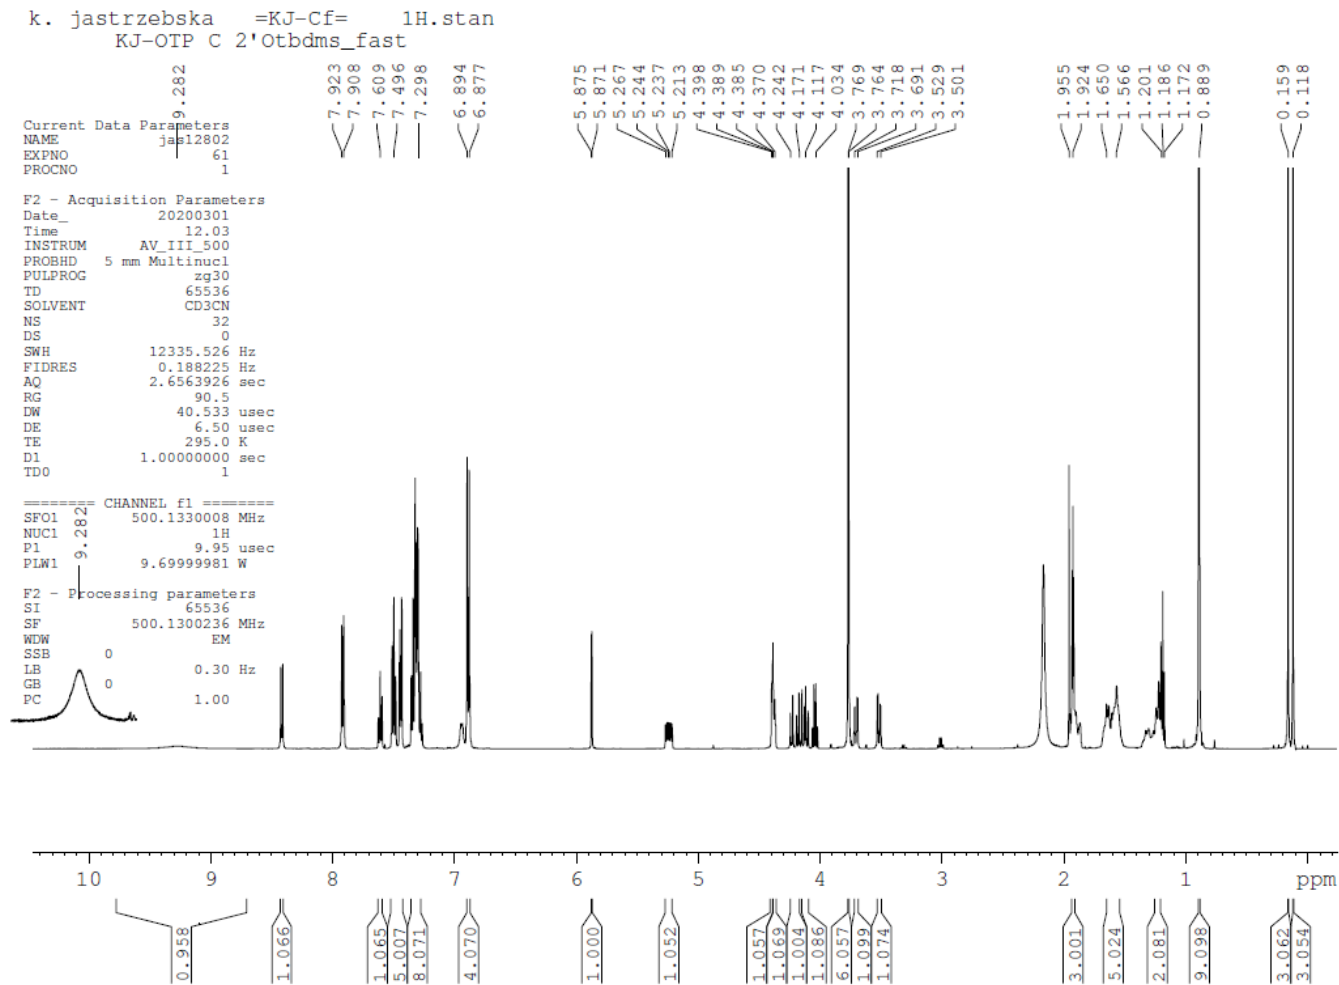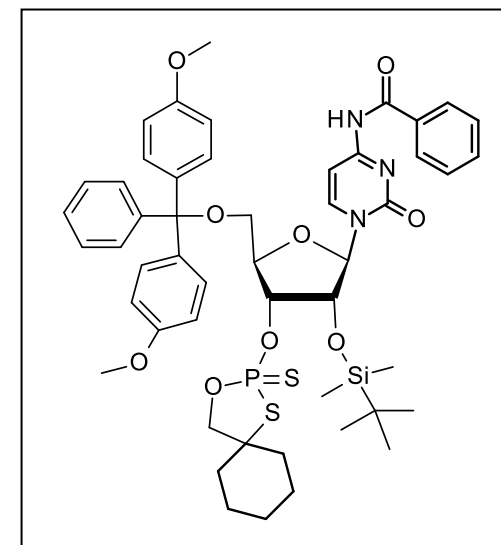

Fast-eluting  $^{13}\text{C}$ -OTP in  $\text{CD}_3\text{CN}$ ;  $\delta$  (ppm)

$^1\text{H}$  NMR: 9.28 (1H, NHCO), 8.50-8.45 (1H, C6-H), 7.61 (1H, C5-H), 7.52-6.88 (18H, DMT, Bz), 5.87 (1H, C1'-H), 5.27-5.21 (1H, C3'-H), 4.40-4.38 (2H, C2'-H, C4'-H), 4.24-4.03 (2H, P-O-CH<sub>2</sub>C-S), 3.77 (6H, 2xOCH<sub>3</sub>), 3.76-3.50 (2H, 5'CH<sub>2</sub>), 1.95-1.17 (10H, -(CH<sub>2</sub>)<sub>5</sub>-„spiro”), 0.89 (9H, 3xCH<sub>3</sub>, tert-Butyl), 0.15-0.12 (6H, 2xCH<sub>3</sub>, -(CH<sub>3</sub>)<sub>2</sub>Si)

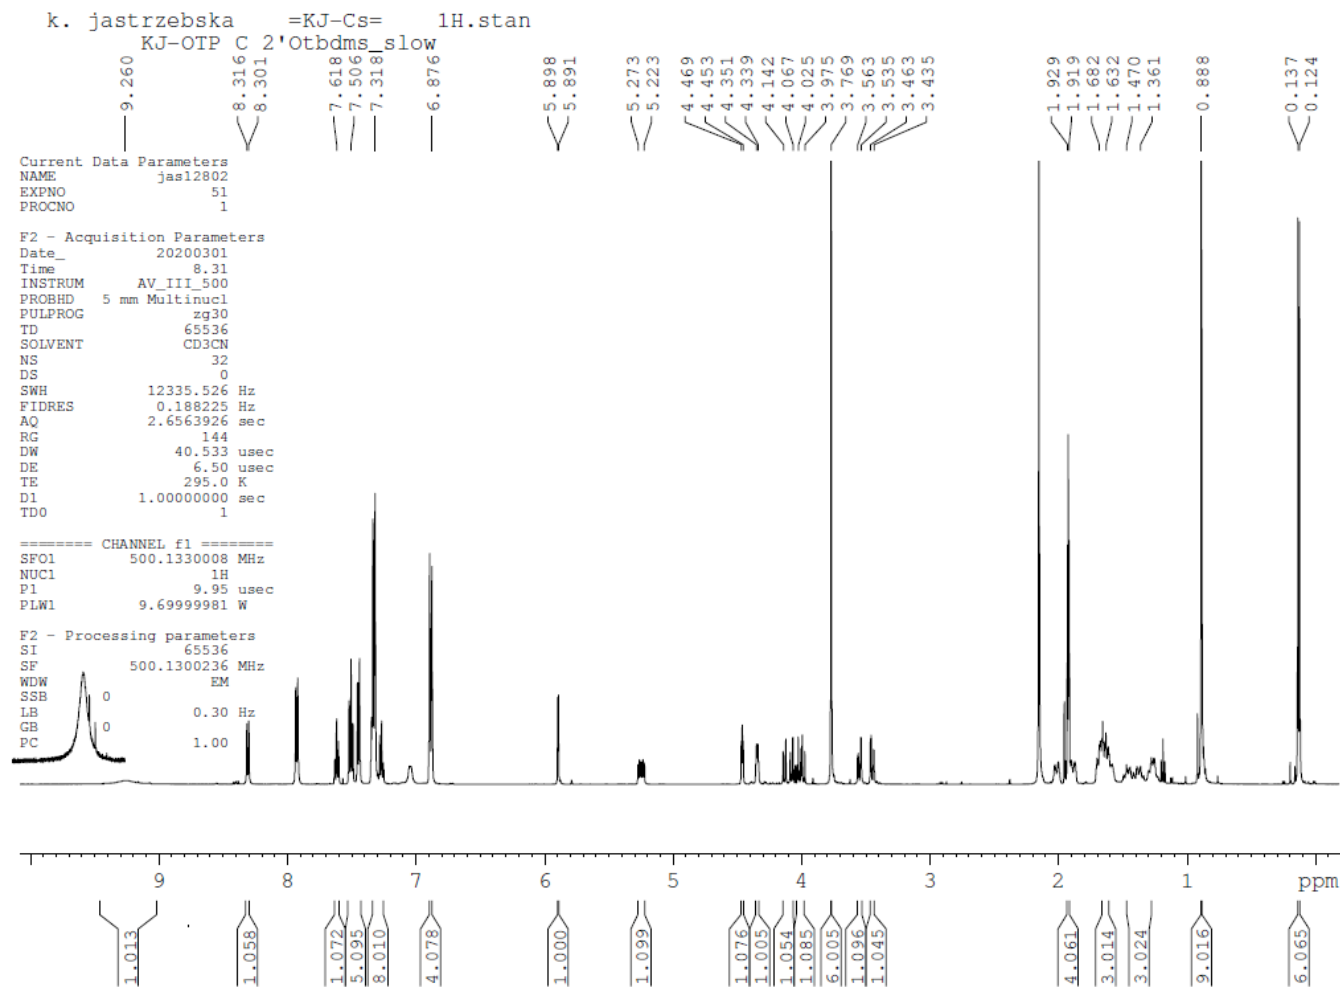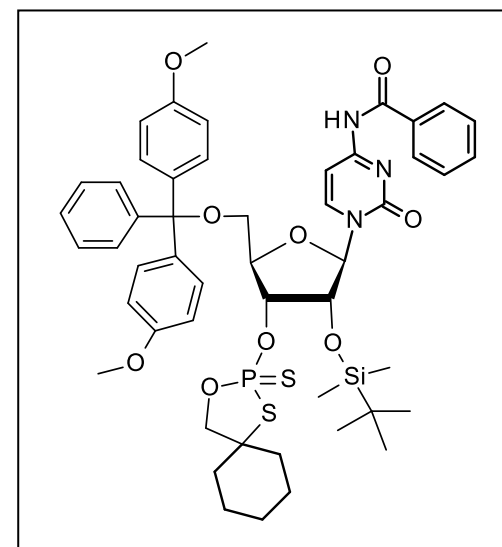

Slow-eluting  $^{13}\text{C}$ -OTP in  $\text{CD}_3\text{CN}$ ;  $\delta$  (ppm)

$^1\text{H}$  NMR: 9.26 (1H, NHCO), 8.32-8.30 (1H, C6-H), 7.61 (1H, C5-H), 7.62-6.88 (18H, DMT, Bz), 5.90-5.89 (1H, C1'-H), 5.27-5.22 (1H, C3'-H), 4.47-4.45 (1H, C2'-H), 4.35-4.34 (1H, C4'-H), 4.14-3.98 (2H, P-O-CH<sub>2</sub>C-S), 3.77 (6H, 2xOCH<sub>3</sub>), 3.56-3.44 (2H, 5'CH<sub>2</sub>), 1.91-1.36 (10H, -(CH<sub>2</sub>)<sub>5</sub>- „spiro”), 0.89 (9H, 3xCH<sub>3</sub>, tert-Butyl), 0.13-0.12 (6H, 2xCH<sub>3</sub>, -(CH<sub>3</sub>)<sub>2</sub>Si)

k. jastrzebska =kj-gf=  
 1H.stan CD3CN (C:\NMR\_Data\Service\CBMM) nmrsu 1

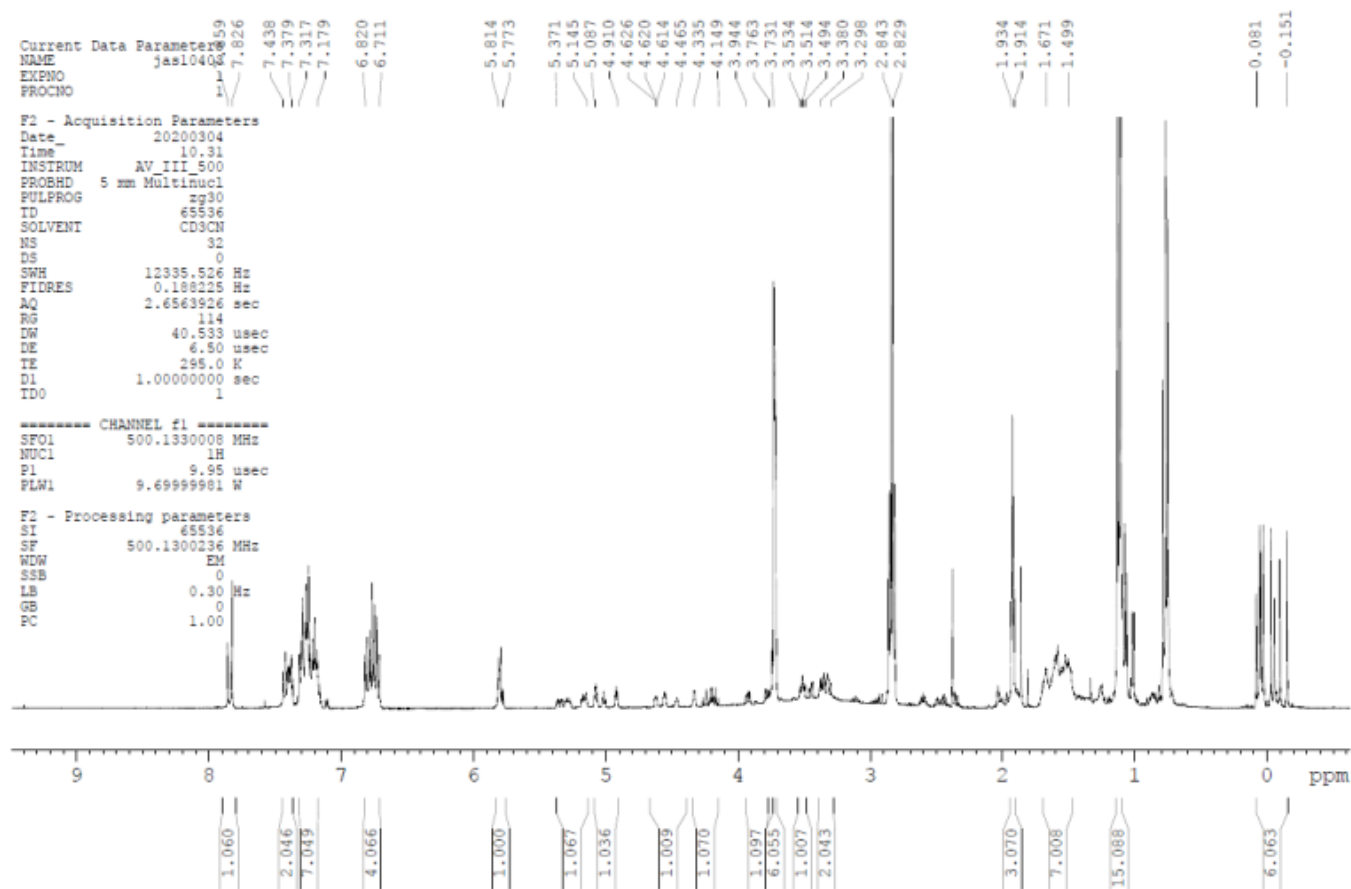

Fast-eluting <sup>1</sup>G-OTP in CD<sub>3</sub>CN; δ (ppm)

<sup>1</sup>H NMR: (1H, N1-H), (1H, N2-H), 7.86-7.82 (1H, C8-H), 7.44-6.71 (13H, DMT), 5.81-5.77 (1H, C1'-H), 5.37-5.14 (1H, C3'-H), 5.09-4.91 (1H, C2'-H), 4.62-4.47 (1H, C4'-H), 4.34-3.76 (2H, P-O-CH<sub>2</sub>C-S), 3.73 (6H, 2xOCH<sub>3</sub>), 3.53-3.49 (1H, CH, iBu), 3.38-3.30 (2H, C5'CH<sub>2</sub>), 1.93-1.50 (10H, -(CH<sub>2</sub>)<sub>5</sub>- „spiro”), 1.13-1.10 (15H, 5xCH<sub>3</sub>, iBu; tert-Butyl), 0.08- (-0.15) (6H, 2xCH<sub>3</sub>, -(CH<sub>3</sub>)<sub>2</sub>Si

k. jastrzebska =kj-gs=  
 1H.stan CD3CN (C:\NMR\_Data\Service\CBMM) nmrsu 2

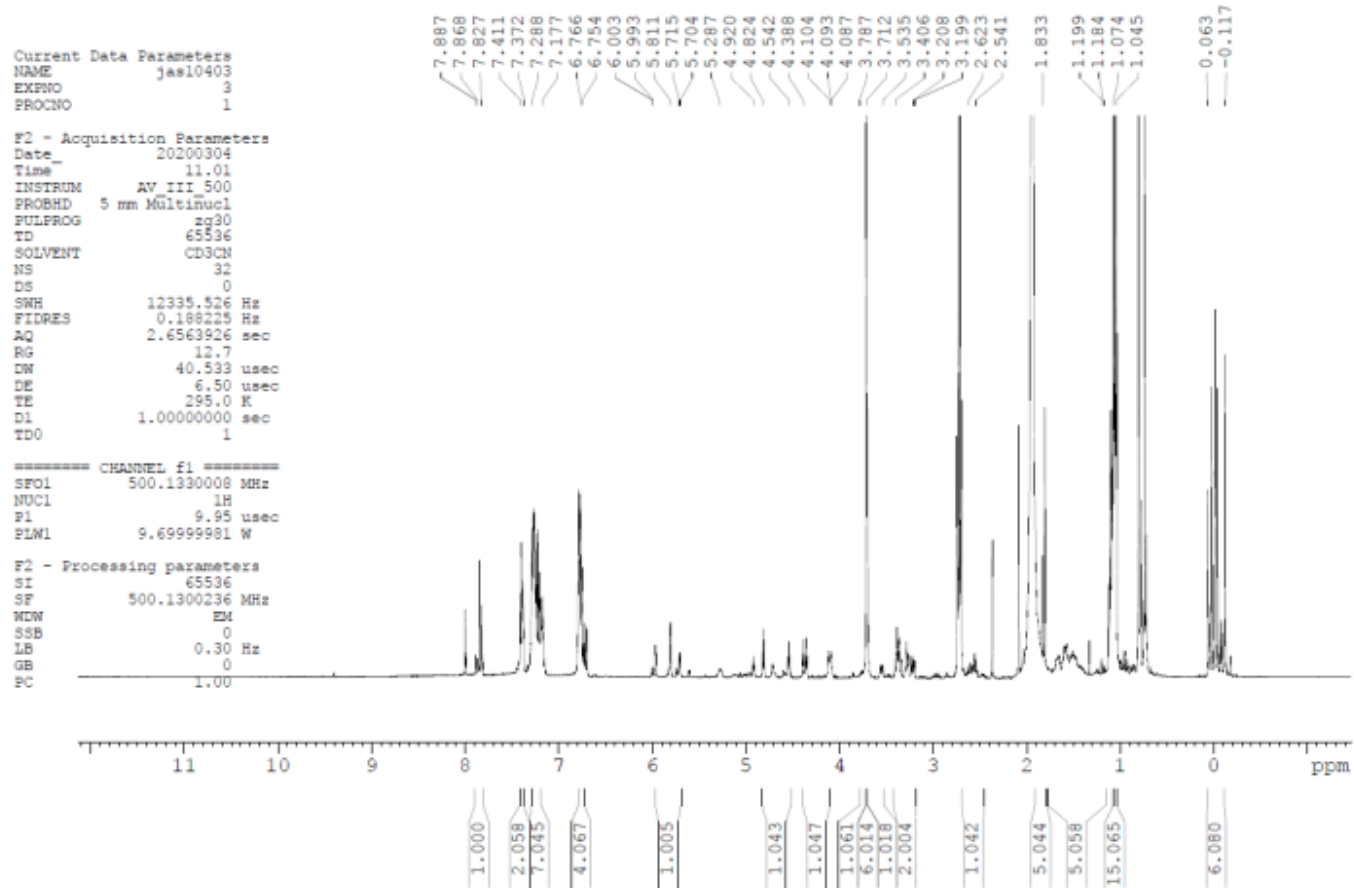

Slow-eluting <sup>1</sup>G-OTP in CD<sub>3</sub>CN; δ (ppm)

<sup>1</sup>H NMR: (1H, N1-H), (1H, N2-H), 7.88-7.82 (1H, C8-H), 7.41-6.75 (13H, DMT), 6.00-5.70 (1H, C1'-H), 5.30-4.92 (1H, C3'-H), 4.82-4.54 (1H, C2'-H), 4.39-4.10 (1H, C4'-H), (2H, P-O-CH<sub>2</sub>C-S), 3.71 (6H, 2xOCH<sub>3</sub>), 3.40-3.20 (2H, C5'CH<sub>2</sub>), 2.62-2.54 (1H, CH, iBu), 1.83-1.18 (10H, -(CH<sub>2</sub>)<sub>5</sub>- „spiro”), 1.07-1.04 (15H, 5xCH<sub>3</sub>, iBu; tert-Butyl), 0.06-(-0.11) (6H, 2xCH<sub>3</sub>, -(CH<sub>3</sub>)<sub>2</sub>Si)

k. jastrzobka =kj-uf=  
 KJ-OTP\_U\_2'OTBDMS\_fast  
 1H.stan CD3CN (C:\NMR\_Data\Service\CBMM) nmrsu 1

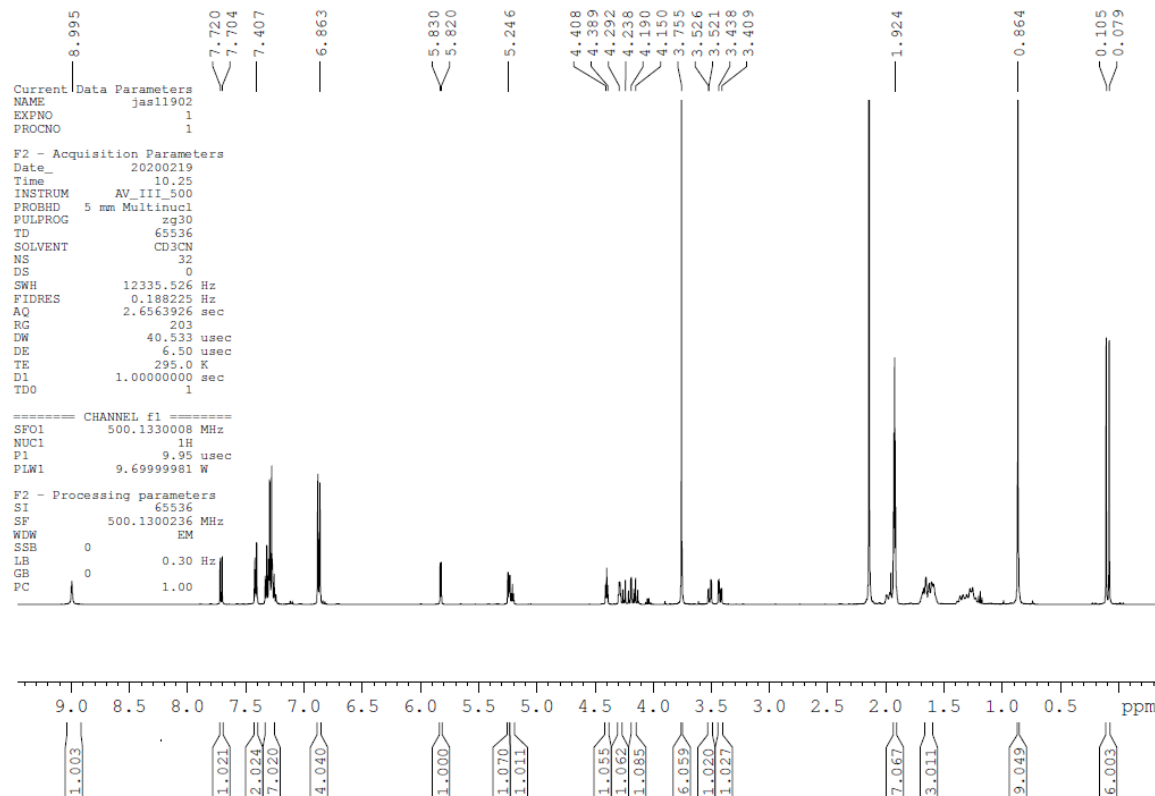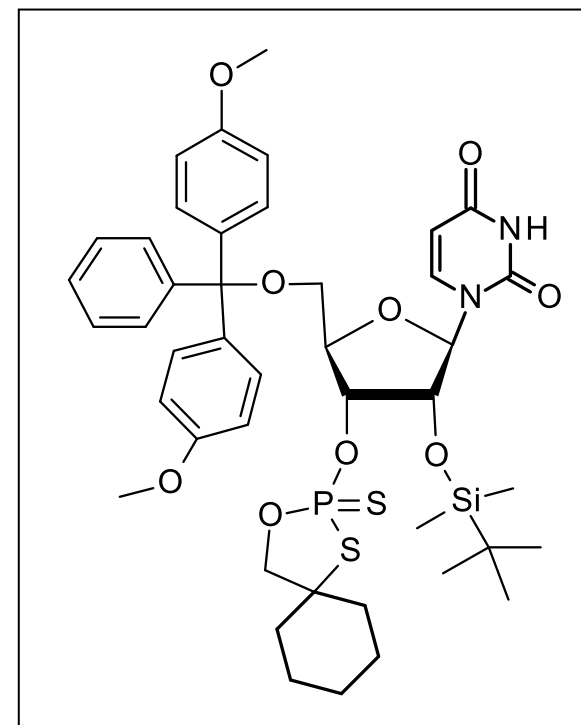

Fast-eluting <sup>1</sup>U-OTP in CD<sub>3</sub>CN; δ (ppm)

<sup>1</sup>H NMR: 8.99 (1H, N3-H), 7,72-7.70 (1H, C6-H), 7,40-6.86 (13H, DMT), 5,83-5.82 (1H, C1'-H), 5,25-5.23 (2H, C3'-H, C2'-H), 4.41-4.39 (1H, C4'-H), 4.38-4.15 (2H, P-O-CH<sub>2</sub>C-S), 3.76 (6H, 2xOCH<sub>3</sub>), 3.53-3.41 (2H, 5'CH<sub>2</sub>), 1.93-1.51 (10H, -(CH<sub>2</sub>)<sub>5</sub>-, *spiro*), 0.86 (9H, 3xCH<sub>3</sub>, tert-Butyl), 0.10-0.08 (6H, 2xCH<sub>3</sub>, -(CH<sub>3</sub>)<sub>2</sub>Si)

k. jastrzebska =kj-us=  
 KJ-OTP\_U\_2'OTBDMs\_slow  
 1H.stan CD3CN (C:\NMR\_Data\Service\CBMM) nmrsu 2

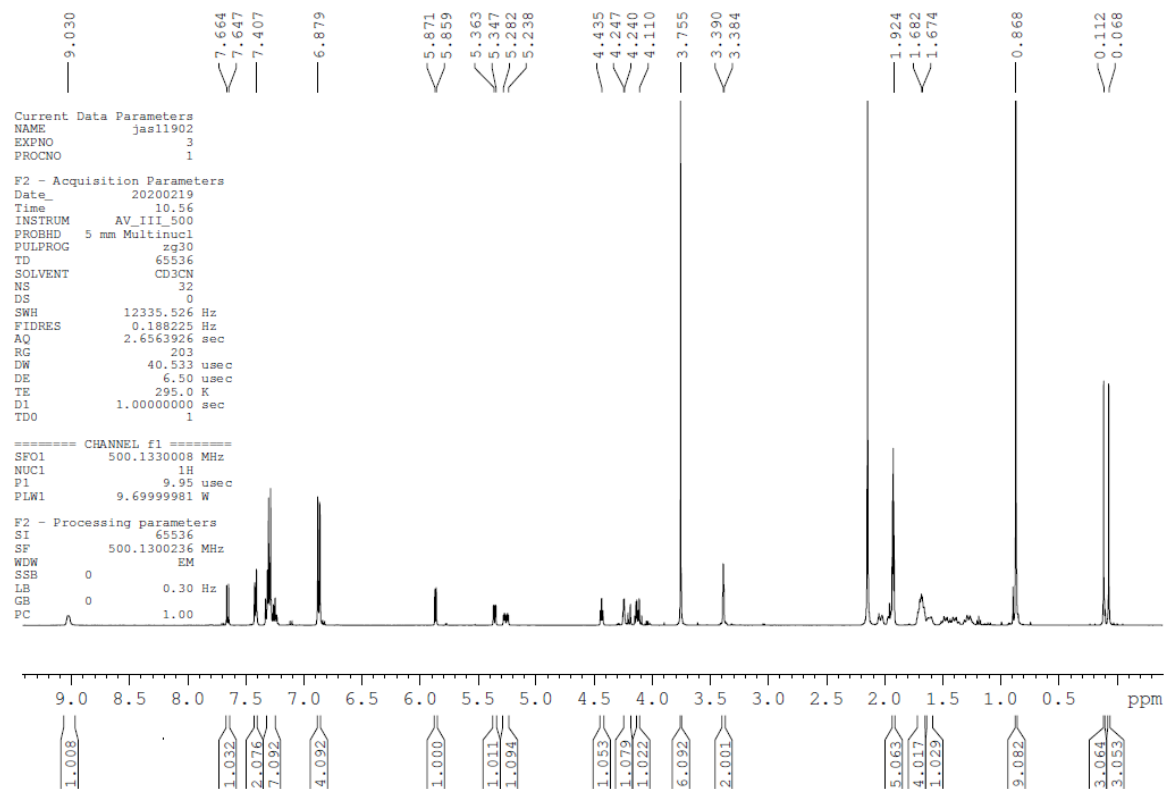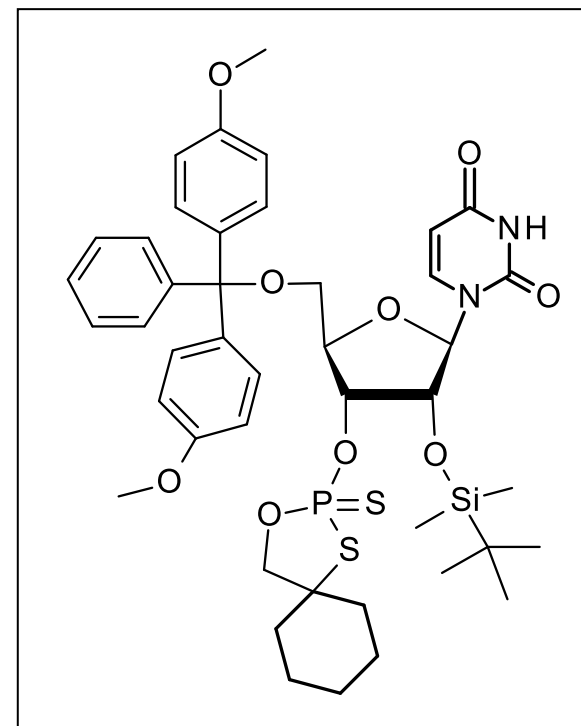

Slow-eluting <sup>1</sup>U-OTP in CD<sub>3</sub>CN; δ (ppm)

<sup>1</sup>H NMR: 9.03 (1H, N3-H), 7.66-7.65 (1H, C6-H), 7.41-6.88 (13H, DMT), 5.88-5.86 (1H, C1'-H), 5.36-5.35 (1H, C3'-H), 5.28-5.24 (1H, C2'-H), 4.44-4.42 (1H, C4'-H), 4.25-4.11 (2H, P-O-CH<sub>2</sub>C-S), 3.76 (6H, 2xOCH<sub>3</sub>), 3.39-3.38 (2H, 5'CH<sub>2</sub>), 1.92-1.67 (10H, -(CH<sub>2</sub>)<sub>5</sub>-„spiro”), 0.87 (9H, 3xCH<sub>3</sub>, tert-Butyl), 0.11-0.07 (6H, 2xCH<sub>3</sub>, -(CH<sub>3</sub>)<sub>2</sub>Si)

**$^{13}\text{C}$  NMR spectra for separated P-diastereomers of  $^{\text{M}}\text{N-OTP}$  and  $^{\text{T}}\text{N-OTP}$  monomers**

**Figure S5.  $^{13}\text{C}$  NMR spectra for separated P-diastereomers of  $^{\text{M}}\text{N-OTP}$  and  $^{\text{T}}\text{N-OTP}$  monomers.**

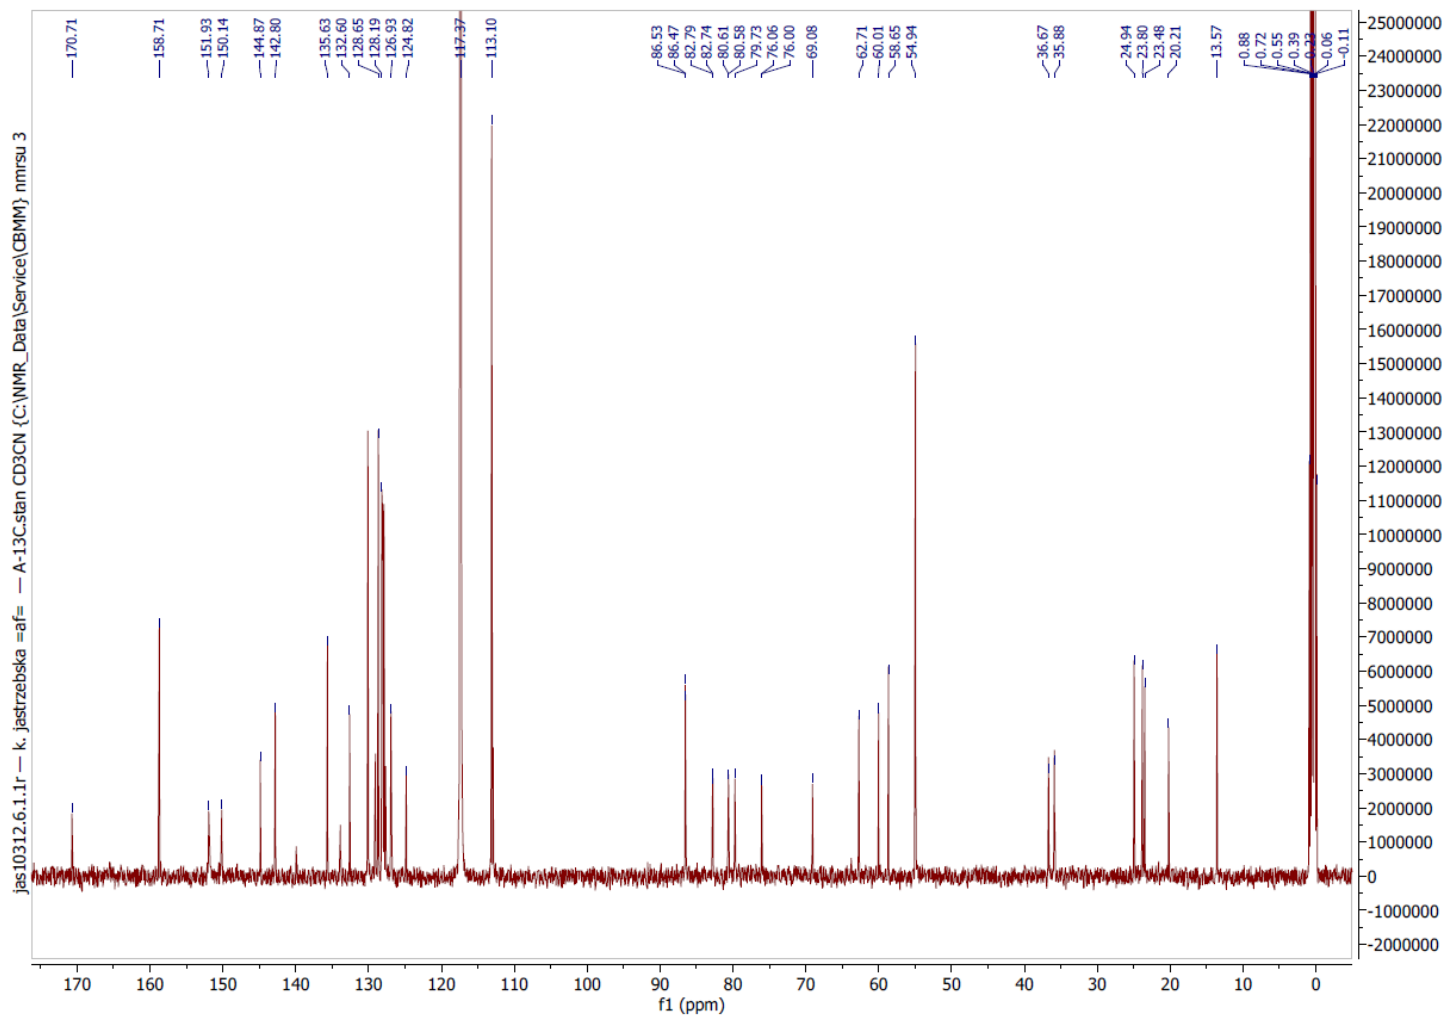

Fast-eluting<sup>M</sup>A-OTP;  $\delta$  (ppm, CD<sub>3</sub>CN): 170.71, 158.71, 151.93, 150.14, 144.87, 142.80, 135.63, 132.60, 128.65, 128.19, 126.93, 124.82, 117.37, 113.10, 86.53, 86.47, 82.79, 82.74, 80.61, 80.58, 79.73, 76.06, 76.00, 69.08, 62.71, 60.01, 58.65, 54.94, 36.67, 35.88, 24.94, 23.80, 23.48, 20.21, 13.57.



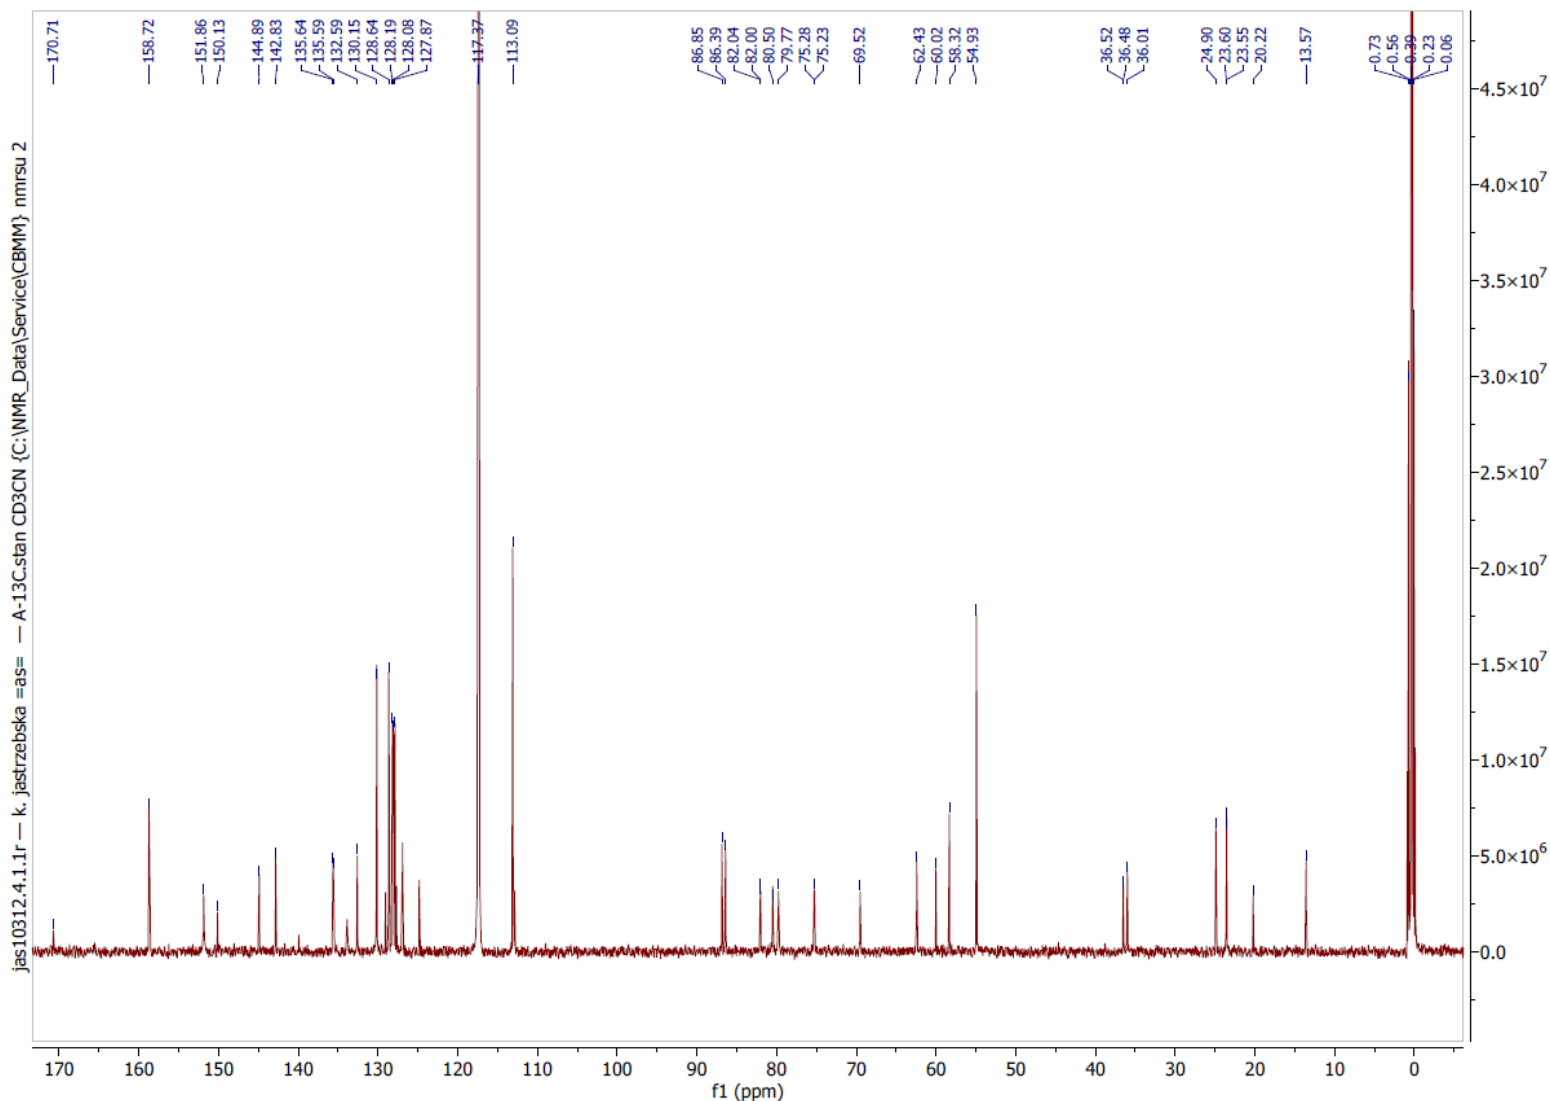

Slow-eluting <sup>M</sup>A-OTP; δ (ppm, CD<sub>3</sub>CN): 170.71, 158.72, 151.86, 150.13, 144.89, 142.83, 135.59, 130.15, 128.64, 128.19, 128.08, 127.87, 117.37, 113.09, 86.85, 86.39, 82.04, 82.00, 80.50, 79.77, 75.28, 75.23, 69.52, 62.43, 60.02, 58.32, 54.93, 36.52, 36.48, 36.01, 24.90, 23.60, 23.55, 20.22, 13.57.

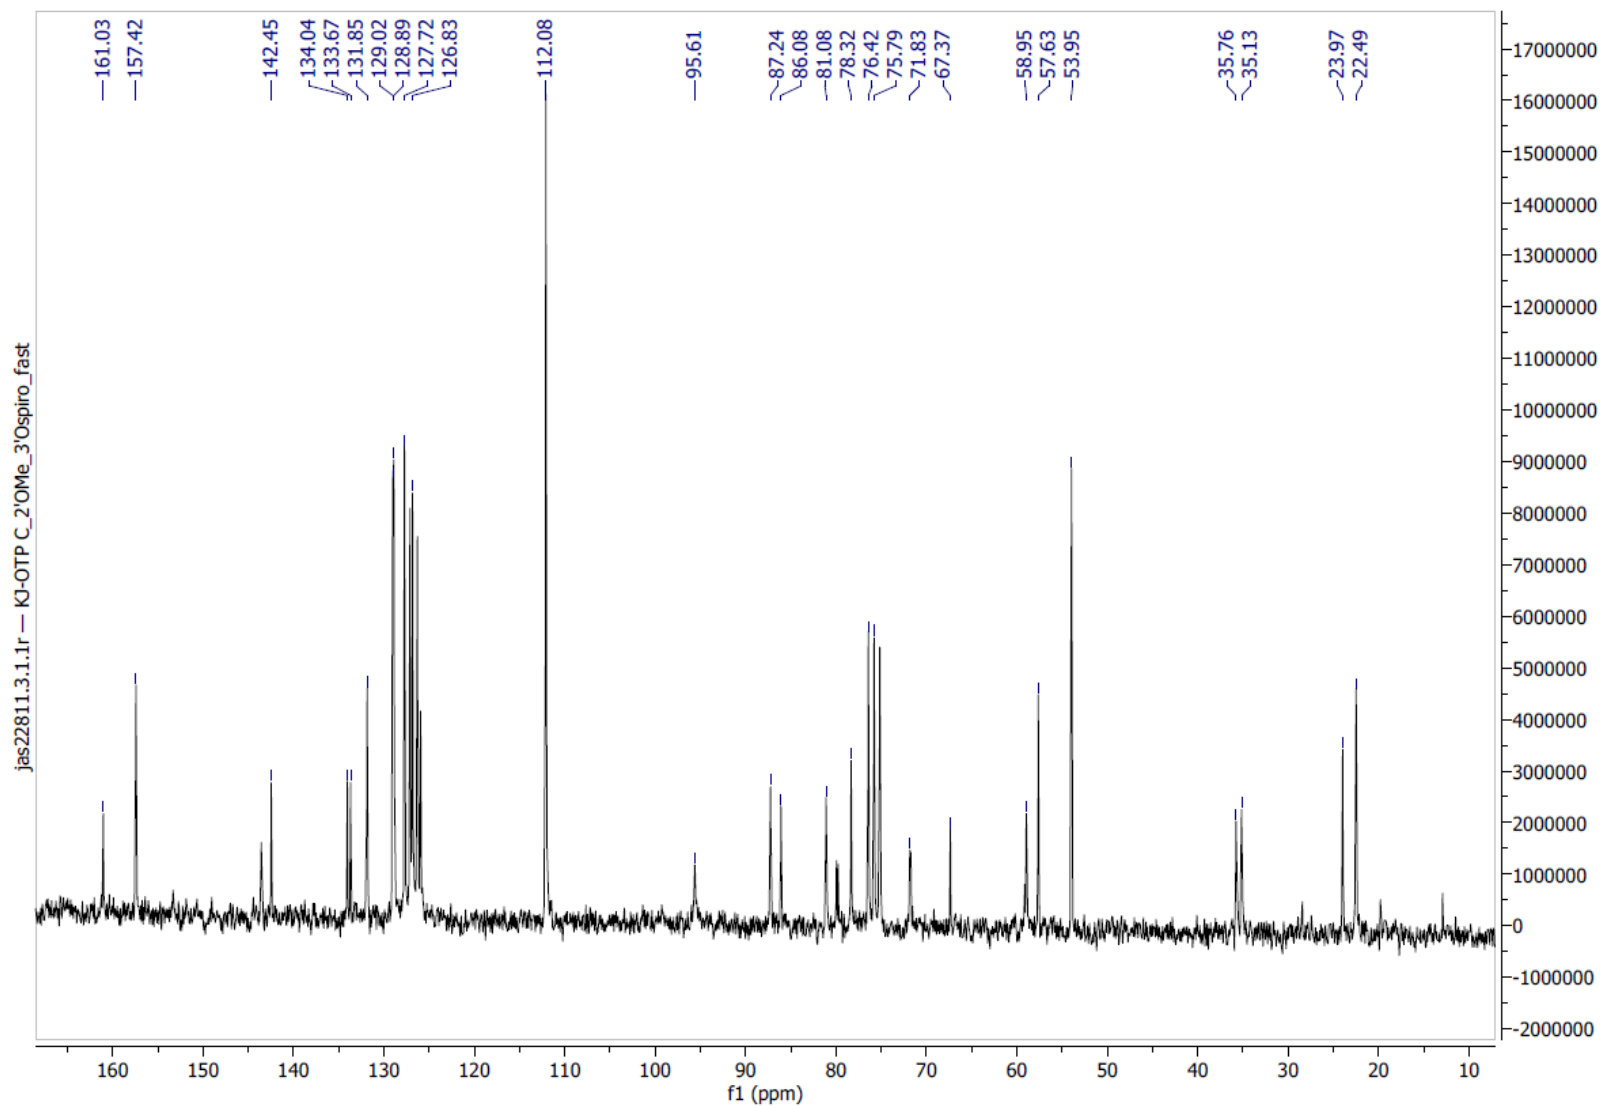

Fast-eluting <sup>13</sup>C-OTP; δ (ppm, CD<sub>3</sub>CN): 161.03, 157.42, 142.45, 134.04, 133.67, 131.85, 129.02, 128.89, 127.72, 126.83, 112.08, 95.61, 87.24, 86.08, 81.08, 78.32, 76.42, 75.79, 71.83, 67.37, 58.95, 57.63, 53.95, 35.76, 35.13, 23.97, 22.49.

KJ-C2'ome slow

Current Data Parameters  
NAME jas12705-2020  
EXPNO 3  
PROCNO 1

F2 - Acquisition Parameters  
Date\_ 20200527  
Time 11.48  
INSTRUM AV-200  
PROBHD 5 mm QNP 1H/13  
PULPROG zgpg30  
TD 32768  
SOLVENT CD3CN  
NS 512  
DS 0  
SWH 12345.679 Hz  
FIDRES 0.376760 Hz  
AQ 1.3271040 sec  
RG 2580.3  
DW 40.500 usec  
DE 7.00 usec  
TE 8.0 K  
D1 2.00000000 sec  
d11 0.03000000 sec  
DELTA 1.89999998 sec  
TD0 1

----- CHANNEL f1 -----  
NUC1 13C  
P1 14.75 usec  
PL1 1.00 dB  
SFO1 50.3358080 MHz

----- CHANNEL f2 -----  
CPDPRG[2] waltz16  
NUC2 1H  
PCPD2 100.00 usec  
PL2 -1.00 dB  
PL12 22.10 dB  
PL13 40.00 dB  
SFO2 200.1610010 MHz

F2 - Processing parameters  
SI 32768  
SF 50.3303369 MHz  
WDW EM  
SSB 0  
LB 2.00 Hz  
GB 0  
PC 1.80

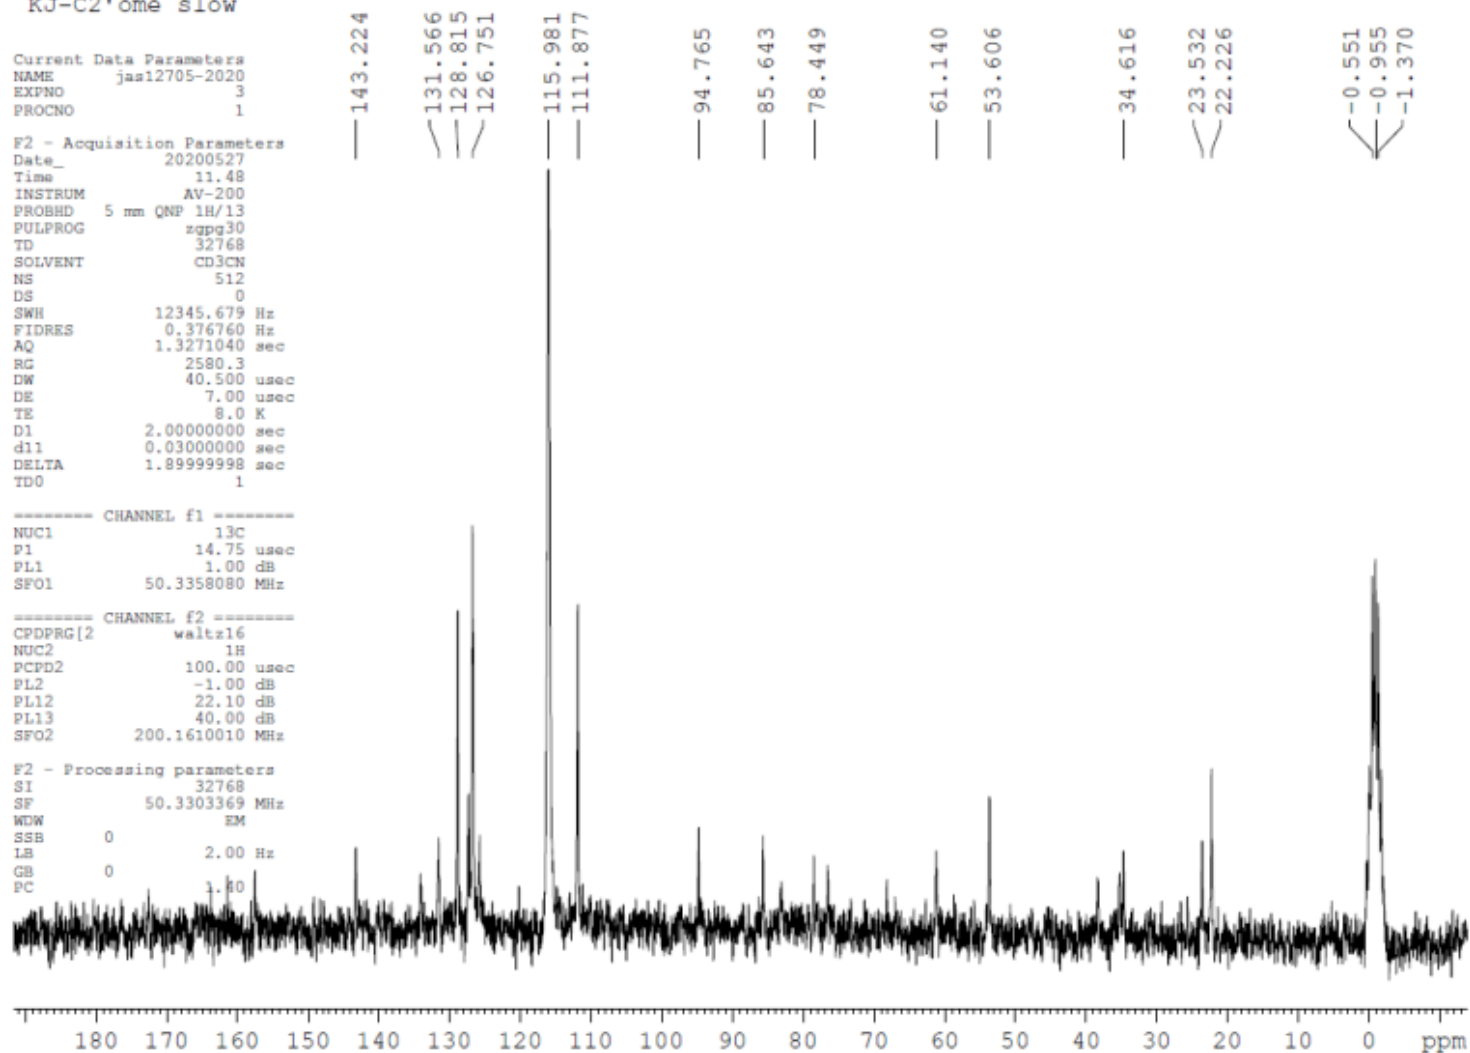

Slow-eluting <sup>13</sup>C-OTP; ; δ (ppm, CD<sub>3</sub>CN): 161.22, 157.75, 143.22, 133.40, 132.87, 131.57, 128.82, 128.12, 127.32, 126.75, 115.98, 111.88, 94.77, 85.64, 83.23, 78.45, 77.21, 67.75, 66.32, 61.14, 53.61, 35.77, 34.62, 23.53, 22.23.

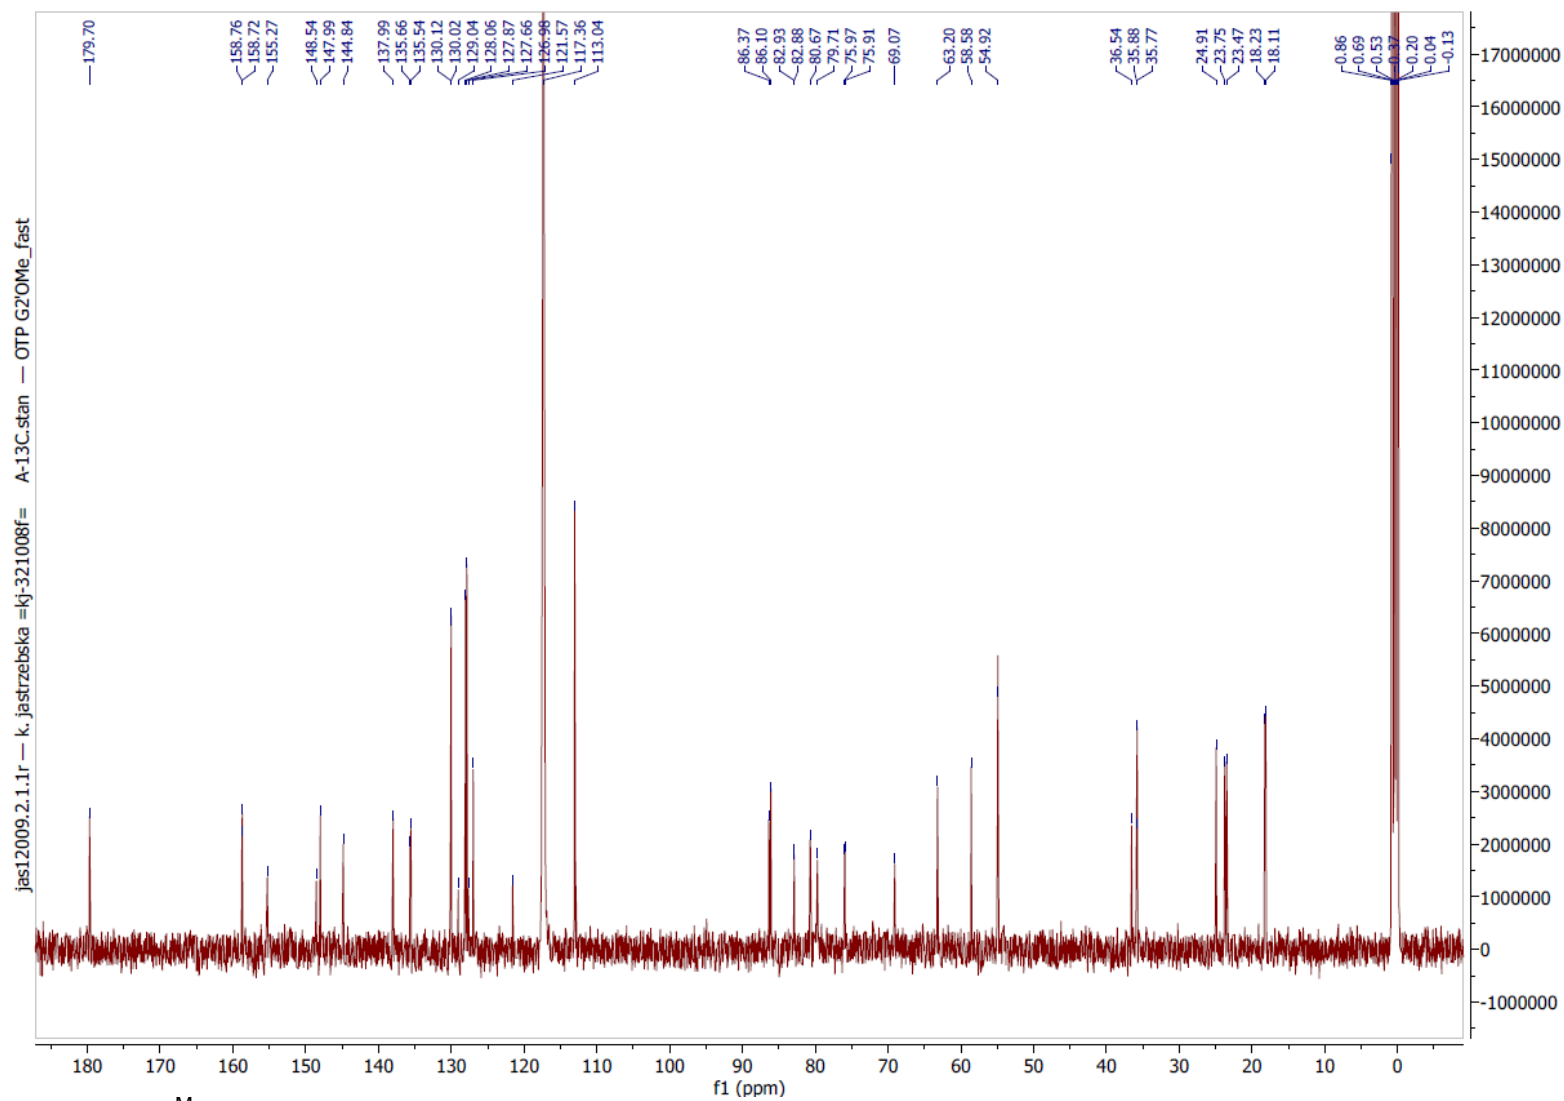

Fast-eluting <sup>M</sup>G-OTP; δ (ppm, CD<sub>3</sub>CN): 179.70, 158.76, 158.72, 155.27, 148.54, 147.99, 144.84, 137.99, 135.66, 135.54, 130.12, 130.02, 129.04, 128.06, 127.87, 127.66, 126.98, 121.57, 117.36, 113.04, 86.37, 86.10, 82.93, 82.88, 80.67, 79.71, 75.97, 75.91, 69.07, 63.20, 58.58, 54.92, 36.54, 35.88, 35.77, 24.91, 23.75, 23.47, 18.23, 18.11.

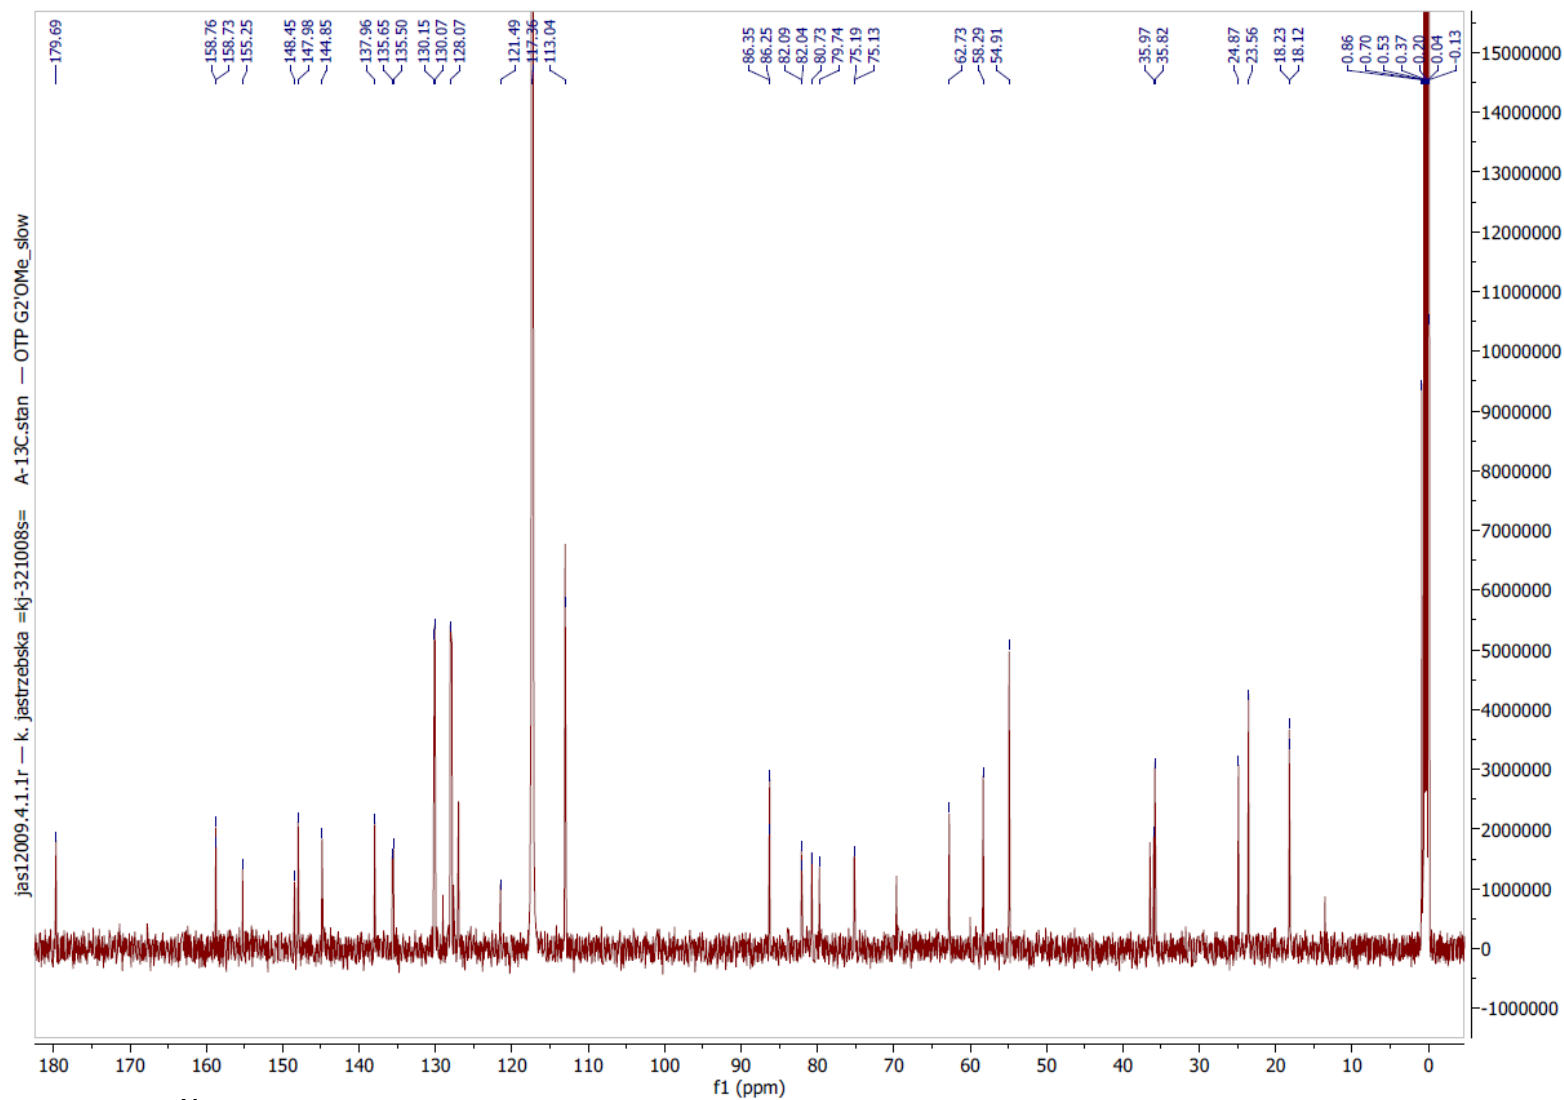

Slow-eluting <sup>M</sup>G-OTP; δ (ppm, CD<sub>3</sub>CN): 179.69, 158.76, 158.73, 155.25, 148.45, 147.98, 144.85, 137.96, 135.55, 135.50, 130.15, 130.07, 128.07, 121.49, 117.36, 113.04, 86.35, 86.25, 82.09, 82.04, 80.73, 79.74, 75.19, 75.13, 62.73, 58.29, 54.91, 35.97, 35.82, 24.87, 23.56, 18.23, 18.12.

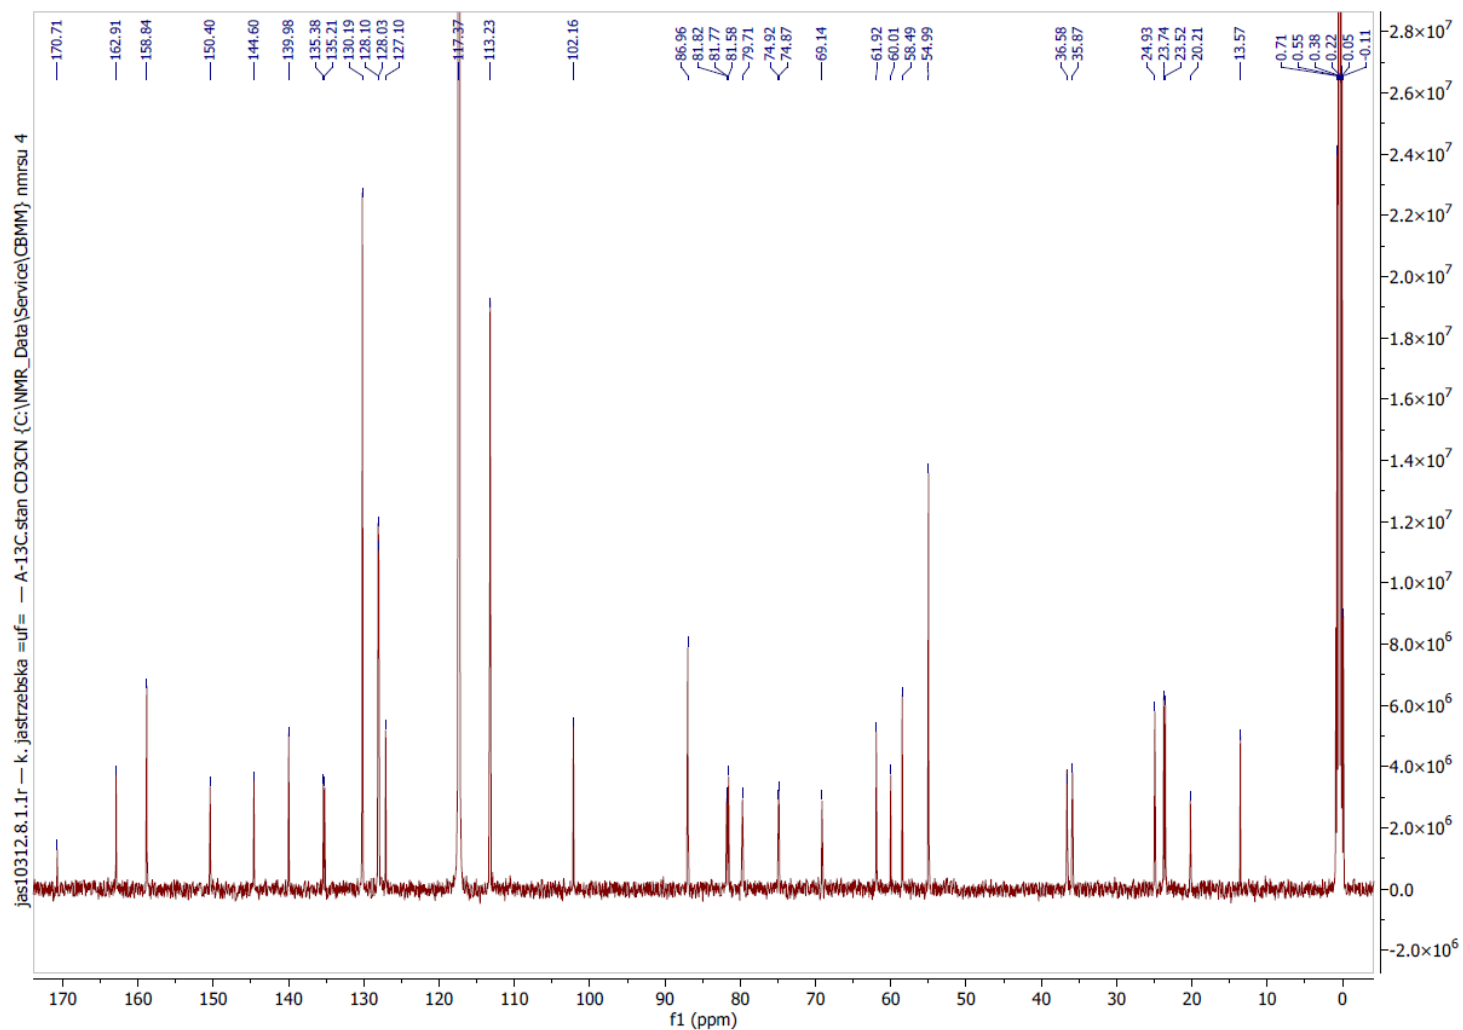

Fast-eluting <sup>M</sup>U-OTP; δ (ppm, CD<sub>3</sub>CN): 170.71, 162.91, 158.84, 150.40, 144.60, 139.98, 135.38, 135.21, 130.19, 128.10, 128.03, 127.10, 117.37, 113.23, 102.16, 86.96, 81.82, 81.77, 81.58, 79.71, 74.92, 74.87, 69.14, 61.92, 60.01, 58.49, 54.99, 36.58, 35.87, 24.93, 23.74, 23.52, 20.21, 13.57.

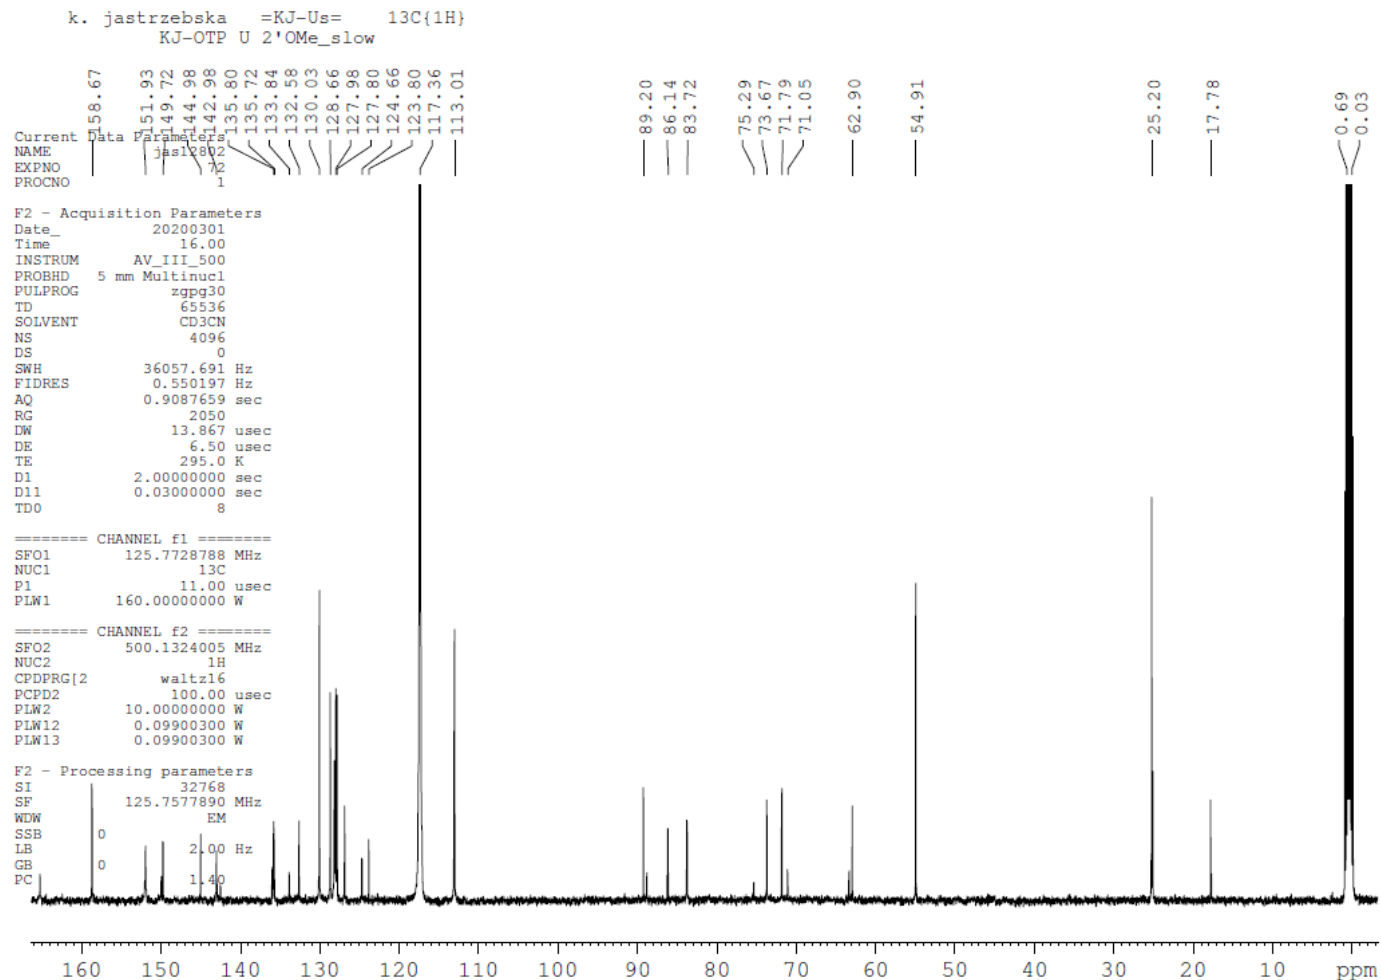

Slow-eluting <sup>13</sup>C-OTP; δ (ppm, CD<sub>3</sub>CN): 170.20, 165.89, 158.67, 151.93, 149.72, 144.98, 142.98, 135.80, 135.72, 133.84, 132.58, 130.03, 128.66, 127.98, 127.80, 117.36, 113.01, 89.20, 86.14, 83.72, 75.29, 73.67, 71.79, 71.05, 62.90, 54.91, 25.20, 17.78.

k. jastrzebska =KJ-Af= 13C{1H}  
 KJ-OTP A 2'Otdms\_fast

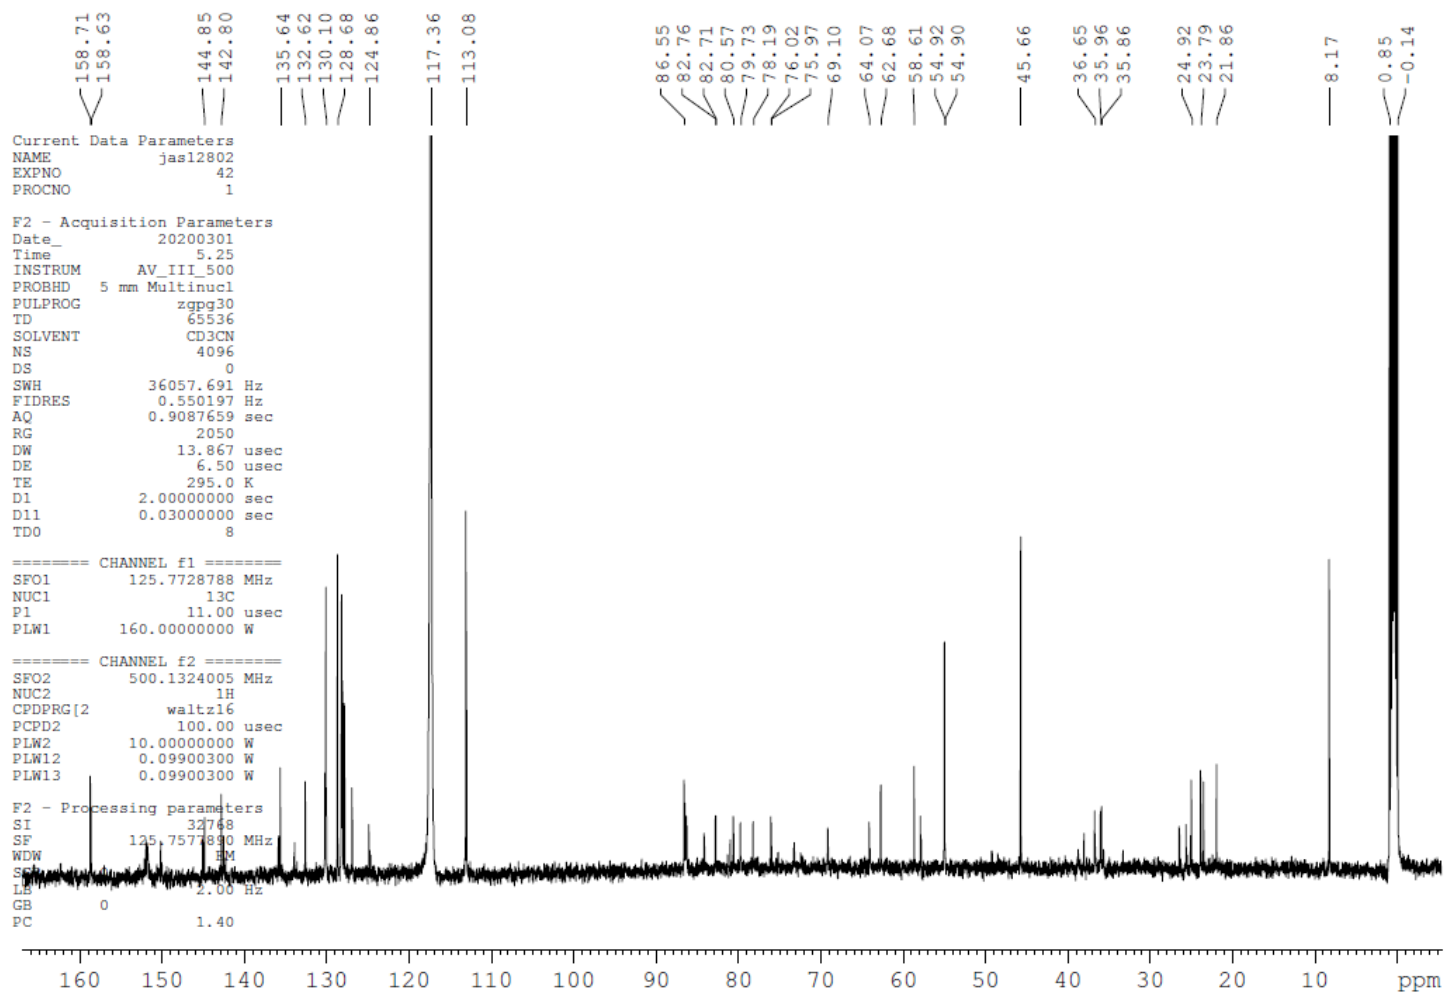

Fast-eluting <sup>1</sup>A-OTP;  $\delta$  (ppm, CD<sub>3</sub>CN): 158.71, 158.63, 144.85, 142.80, 135.64, 132.62, 130.10, 128.68, 124.86, 117.36, 113.08, 86.55, 82.76, 82.71, 80.57, 79.73, 78.19, 76.02, 75.97, 69.10, 64.07, 62.68, 58.61, 54.92, 54.90, 45.66, 36.65, 35.96, 35.86, 24.92, 23.79, 21.86, 8.17.



k. jastrzebska =KJ-As= 13C{1H}  
 KJ-OTP A 2'Otbdms\_slow

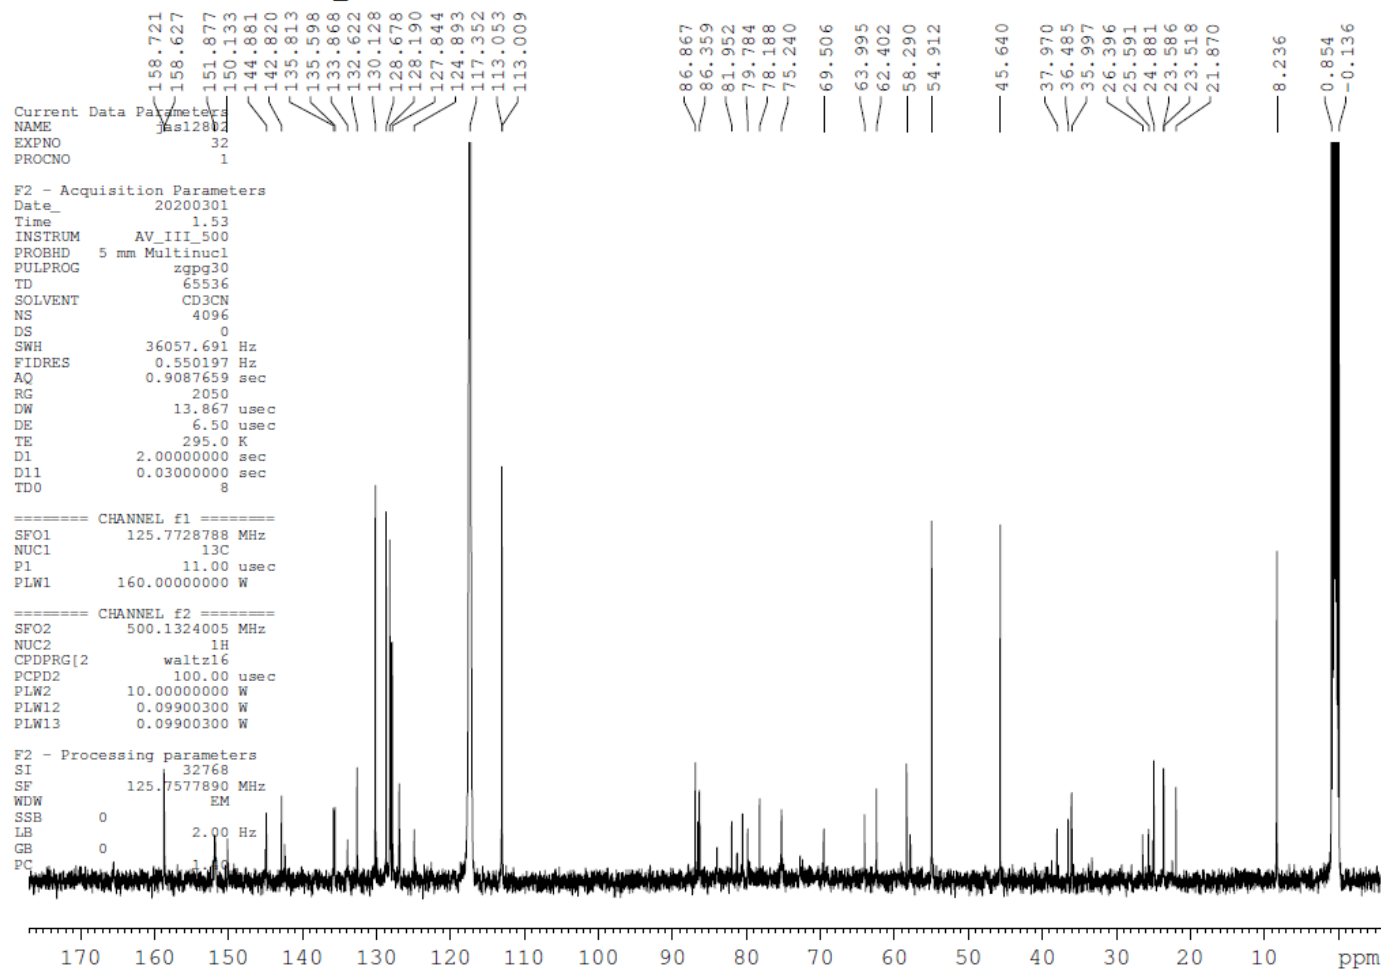

Slow-eluting <sup>1</sup>A-OTP; δ (ppm, CD<sub>3</sub>CN): 158.72, 158.63, 151.87, 150.13, 144.88, 142.82, 135.81, 135.60, 133.87, 132.62, 130.13, 128.68, 128.19, 127.84, 124.89, 117.35, 113.05, 113.00, 86.87, 86.36, 81.95, 79.78, 78.19, 75.24, 69.51, 64.00, 62.40, 58.29, 54.91, 45.64, 37.97, 36.49, 36.00, 26.40, 25.59, 24.88, 23.59, 23.52, 21.87, 8.23.

k. jastrzebska =KJ-Cf= 13C{1H}  
 KJ-OTP C 2'Otbdms\_fast

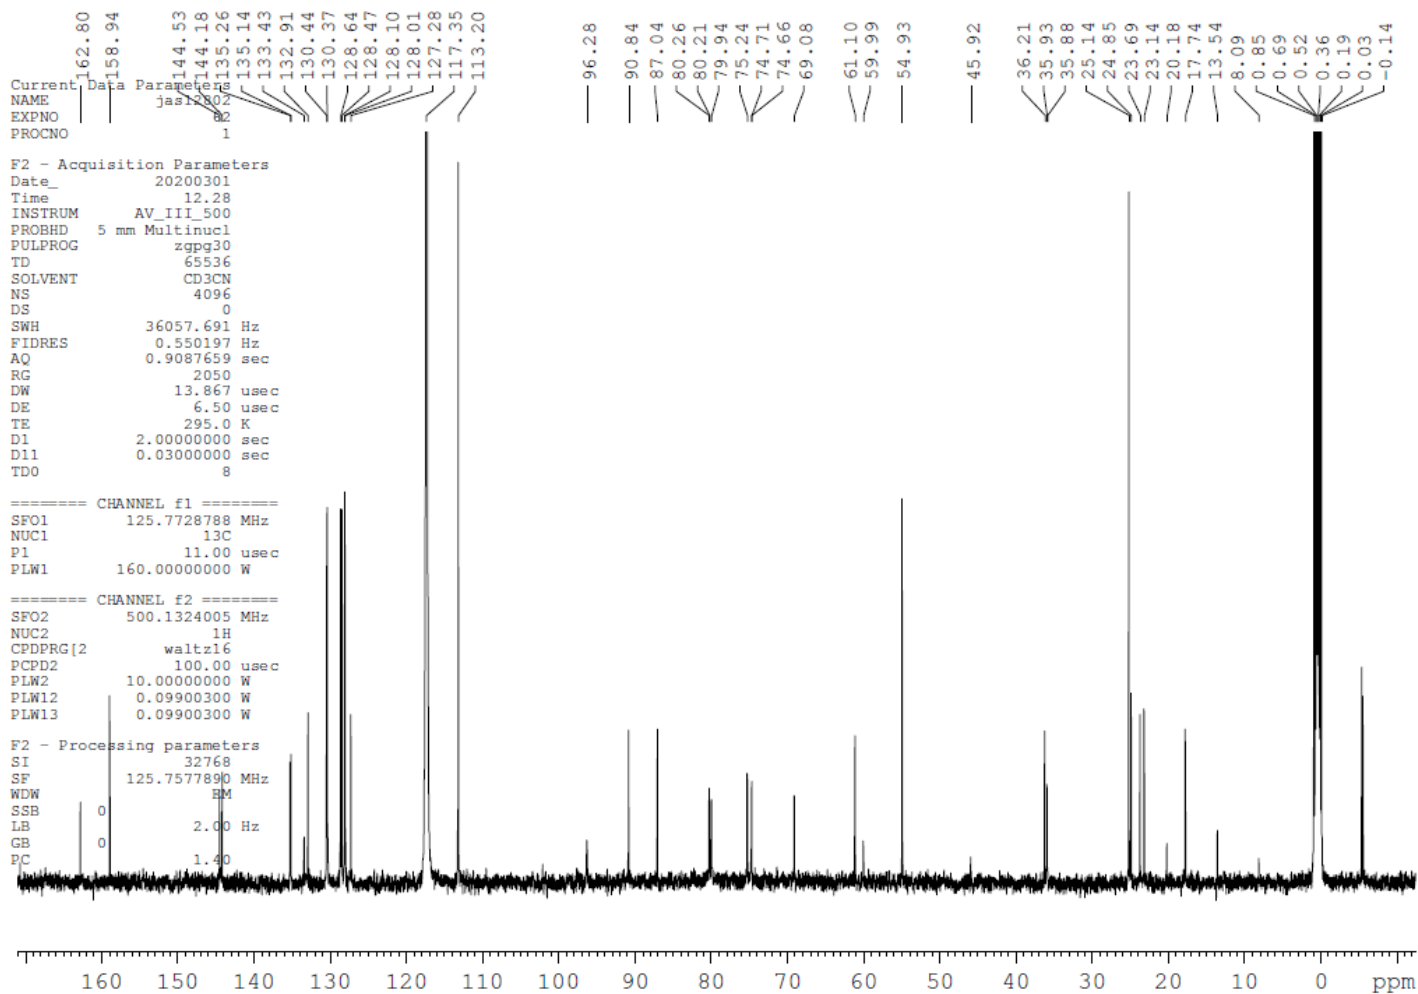

Fast-eluting <sup>13</sup>C-OTP;  $\delta$  (ppm, CD<sub>3</sub>CN): 162.80, 158.94, 144.53, 144.18, 135.26, 135.14, 133.43, 132.91, 130.44, 130.37, 128.64, 128.47, 128.10, 128.01, 127.28, 117.35, 113.20, 96.28, 90.84, 87.04, 80.26, 80.21, 79.94, 75.24, 74.71, 74.66, 69.08, 61.10, 59.99, 54.93, 45.92, 36.21, 35.93, 35.88, 25.14, 24.85, 23.69, 23.14, 20.18, 17.74, 13.54, 8.09.

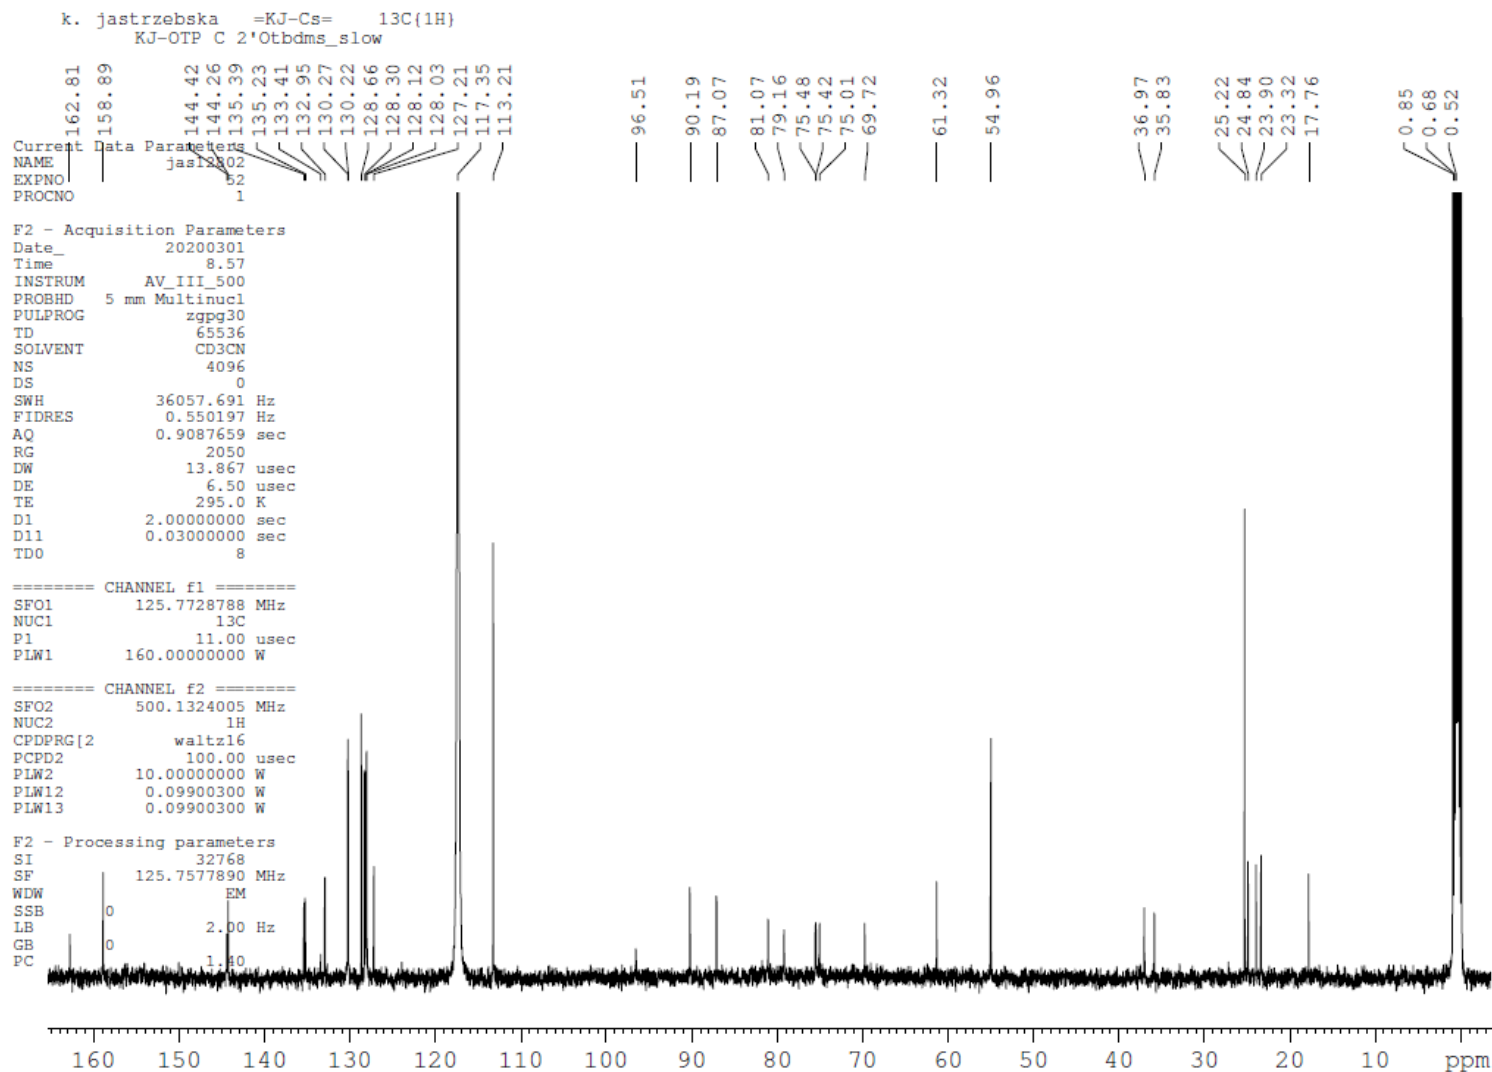

Slow-eluting <sup>13</sup>C-OTP; δ (ppm, CD<sub>3</sub>CN): 162.81, 158.89, 144.42, 144.26, 135.39, 135.23, 133.41, 132.95, 130.27, 130.22, 128.66, 128.30, 128.12, 128.03, 127.21, 117.35, 113.21, 96.51, 90.19, 87.07, 79.16, 75.48, 75.42, 75.01, 69.72, 61.32, 54.96, 36.97, 35.83, 25.22, 24.84, 23.90, 23.32, 17.76.

k. jastrzebska =kj-gf=  
 C.stan CD3CN {C:\NMR\_Data\Service\CBMM} nmr

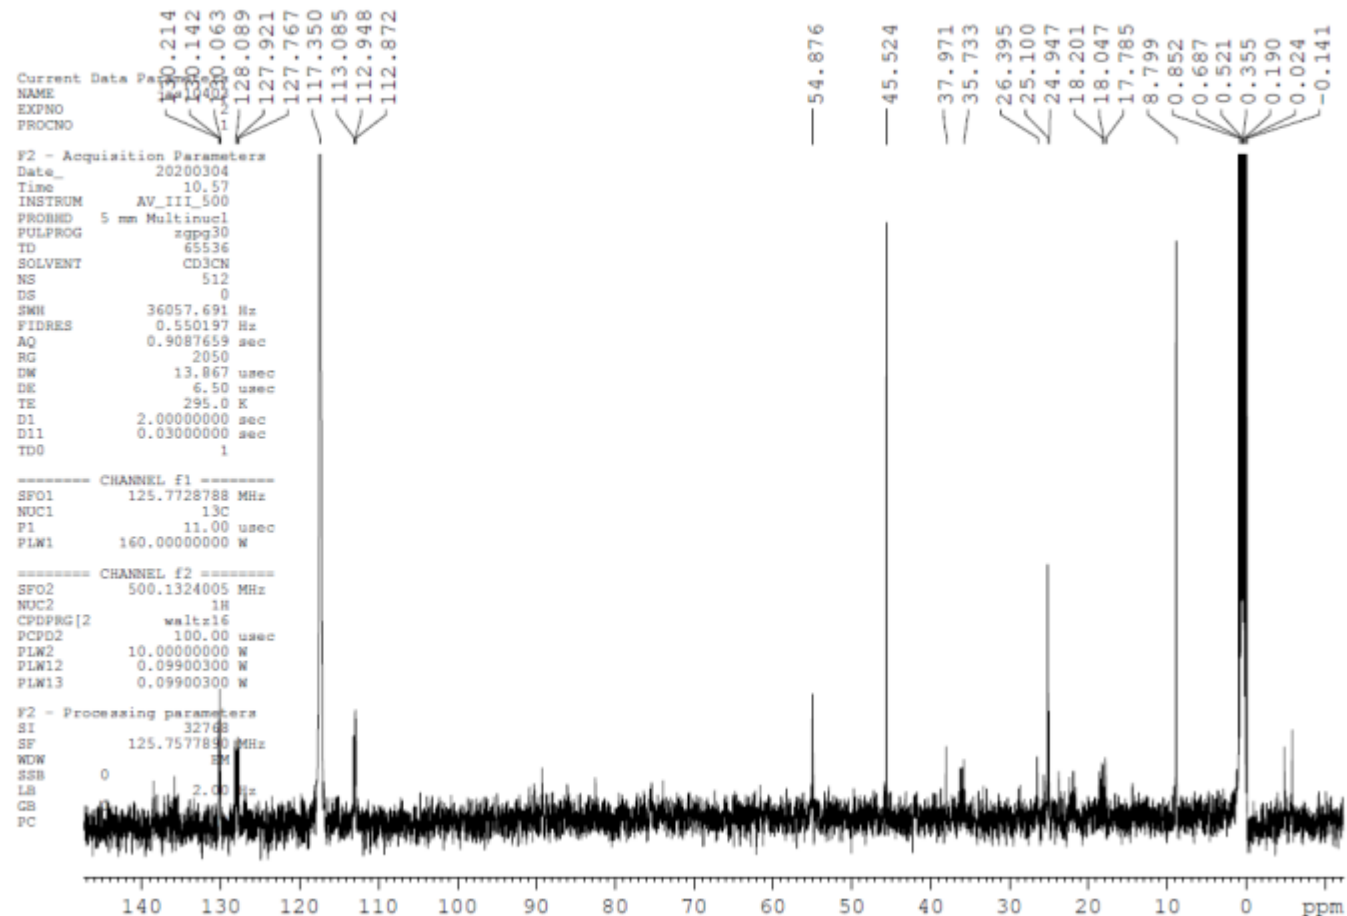

Fast-eluting TG-OTP;  $\delta$  (ppm, CD<sub>3</sub>CN): 172.18, 158.60, 152.27, 144.41, 143.32, 135.45, 134.00, 132.94, 129.46, 128.70, 113.34, 87.93, 86.84, 83.00, 74.35, 68.81, 62.64, 55.24, 37.00, 36.58, 25.52, 23.74, 17.88, 11.21.

k. jastrzebska =kj-gs=  
 C.stan CD3CN (C:\NMR\_Data\Service\CBMM) nmr  
 KJ-OTP\_G\_2'OtBDMS\_slow

Current Data Parameters  
 NAME jan10403  
 EXPNO 4  
 PROCNO 1  
 F2 - Acquisition Parameters  
 Date\_ 20200304  
 Time 11.27  
 INSTRUM AV III 500  
 PROBHD 5 mm Multinucl  
 PULPROG zgpg30  
 TD 65536  
 SOLVENT CD3CN  
 NS 512  
 DS 0  
 SWH 36057.691 Hz  
 FIDRES 0.550197 Hz  
 AQ 0.9087659 sec  
 RG 2050  
 DW 13.867 usec  
 DE 6.50 usec  
 TE 295.0 K  
 D1 2.00000000 sec  
 D11 0.03000000 sec  
 TDO 1

==== CHANNEL f1 =====  
 SFO1 125.7728788 MHz  
 NUC1 13C  
 P1 11.00 usec  
 PLW1 160.00000000 W

==== CHANNEL f2 =====  
 SFO2 500.1324005 MHz  
 NUC2 1H  
 CPDPRG[2] waltz16  
 PCPD2 100.00 usec  
 PLW2 10.00000000 W  
 PLW12 0.09900300 W  
 PLW13 0.09900300 W

F2 - Processing parameters  
 SI 32768  
 SF 125.7577890 MHz  
 WDW EM  
 SSB 0  
 LB 2.00 Hz  
 GB 0  
 PC 1.40

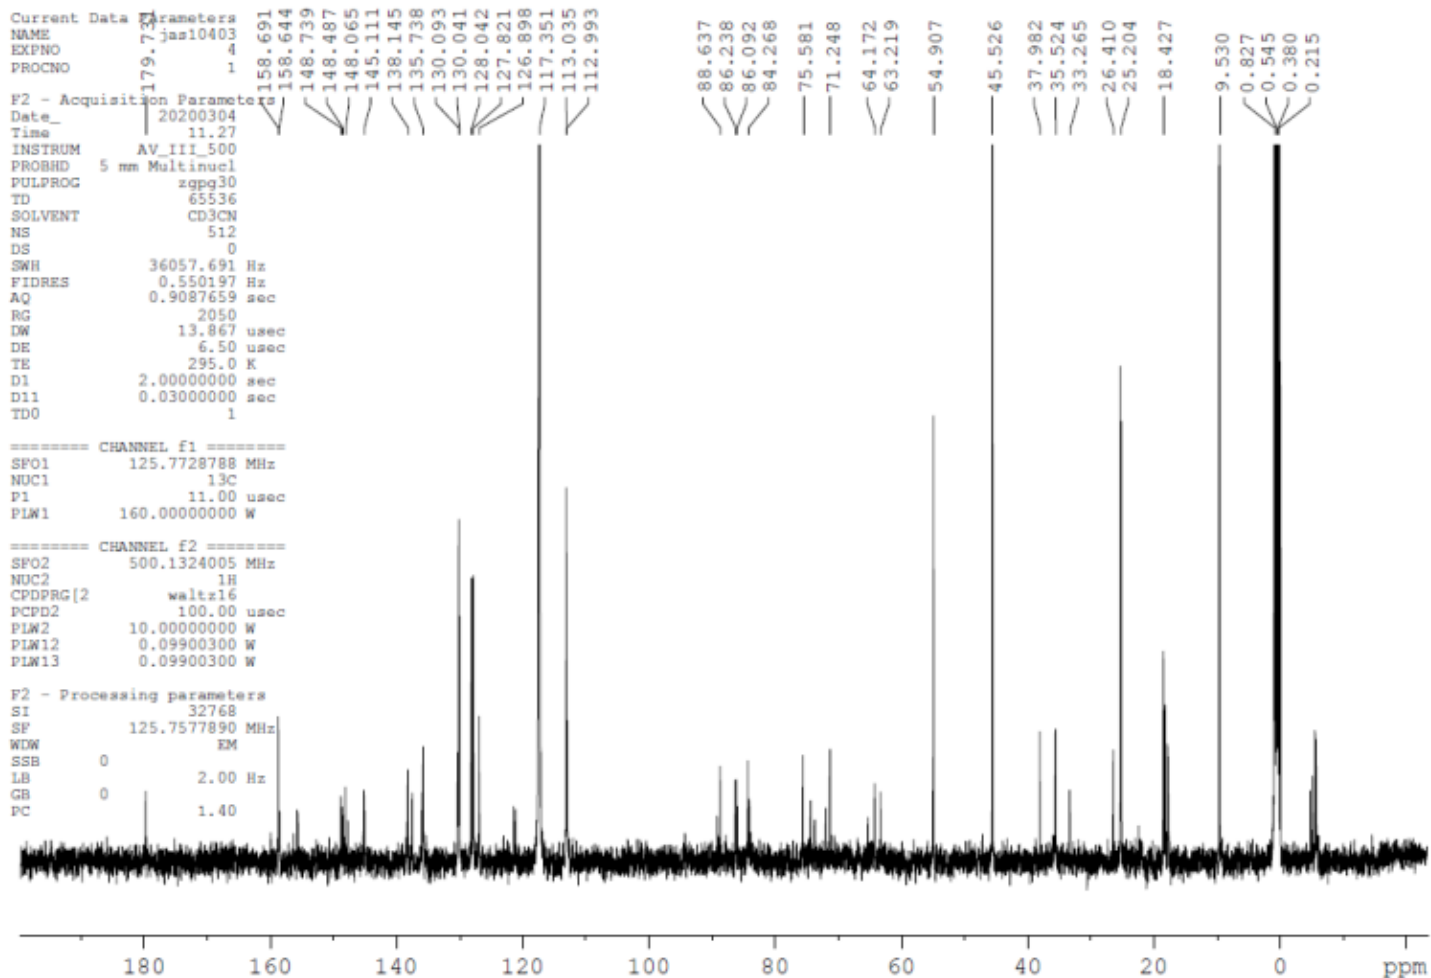

Slow-eluting Tg-OTP;  $\delta$  (ppm, CD<sub>3</sub>CN): 179.73, 158.64, 148.74, 148.49, 148.07, 145.11, 138.15, 135.74, 130.09, 130.04, 128.04, 127.82, 126.90, 117.35, 113.04, 112.99, 88.64, 86.24, 86.09, 84.27, 75.58, 71.25, 64.17, 63.22, 54.91, 45.53, 37.98, 35.52, 33.27, 26.41, 25.20, 18.43, 9.53.

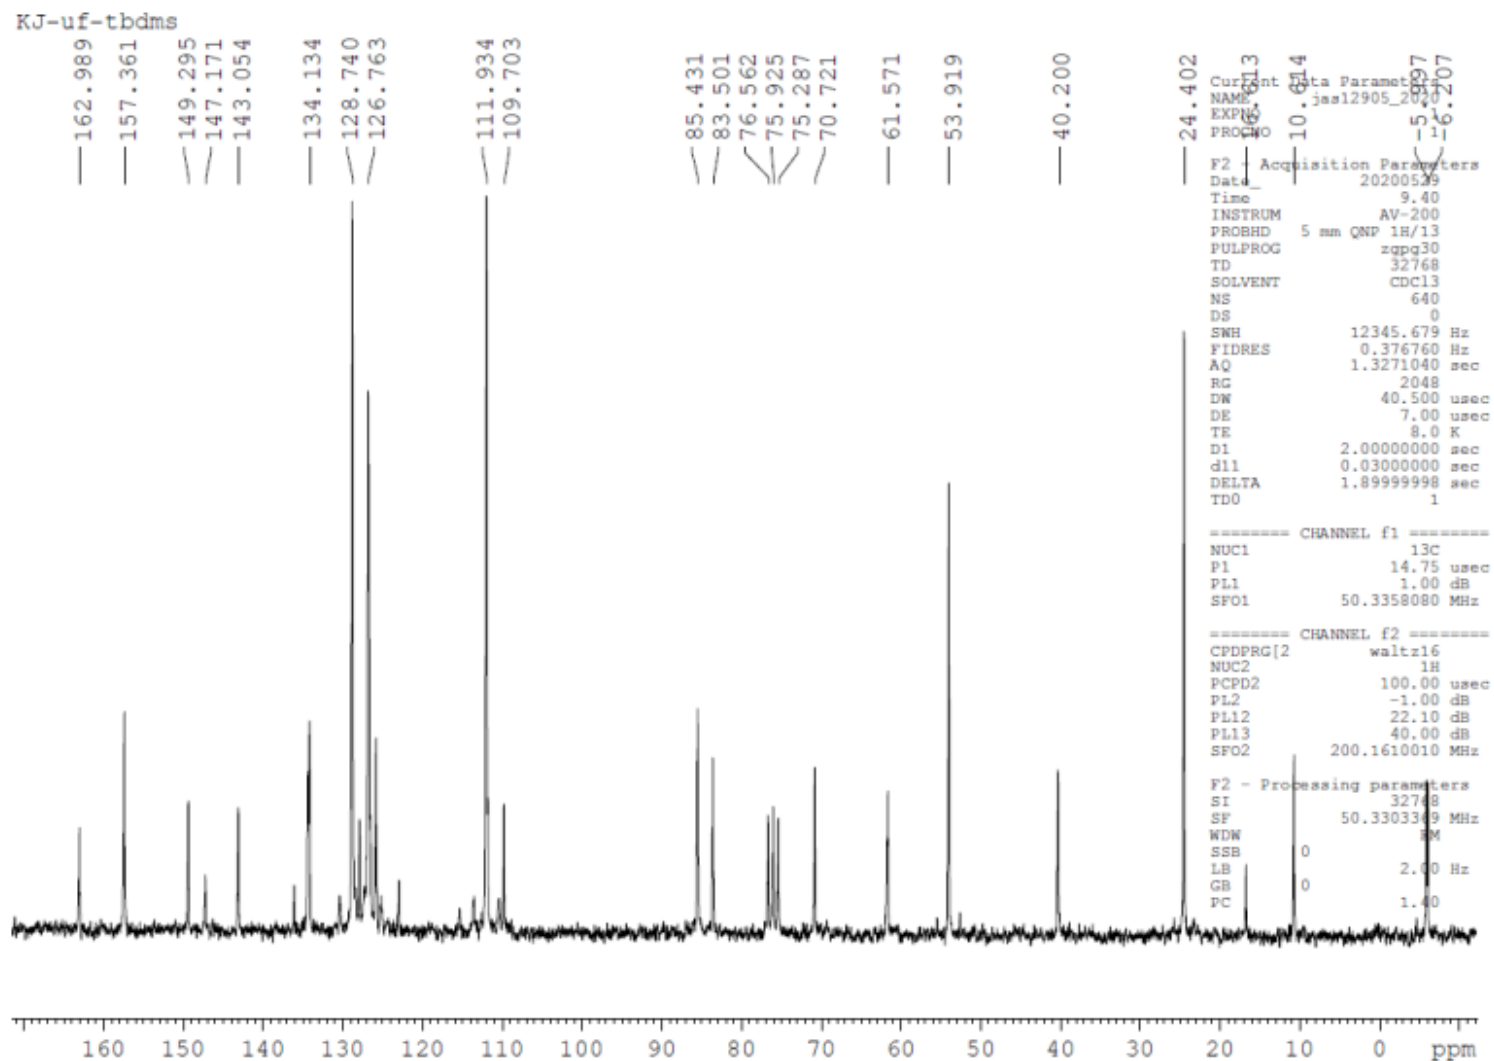

Fast-eluting <sup>1</sup>U-OTP; δ (ppm, CD<sub>3</sub>CN): 162.99, 157.36, 149.30, 147.17, 143.05, 134.13, 128.74, 126.76, 111.93, 109.70, 85.43, 83.50, 76.56, 75.93, 75.29, 70.72, 61.57, 53.92, 40.20, 24.40, 16.61, 10.61.

k. jastrzebska =kj-us=  
 C.stan CD3CN (C:\NMR\_Data\Service\CBMM) nmr

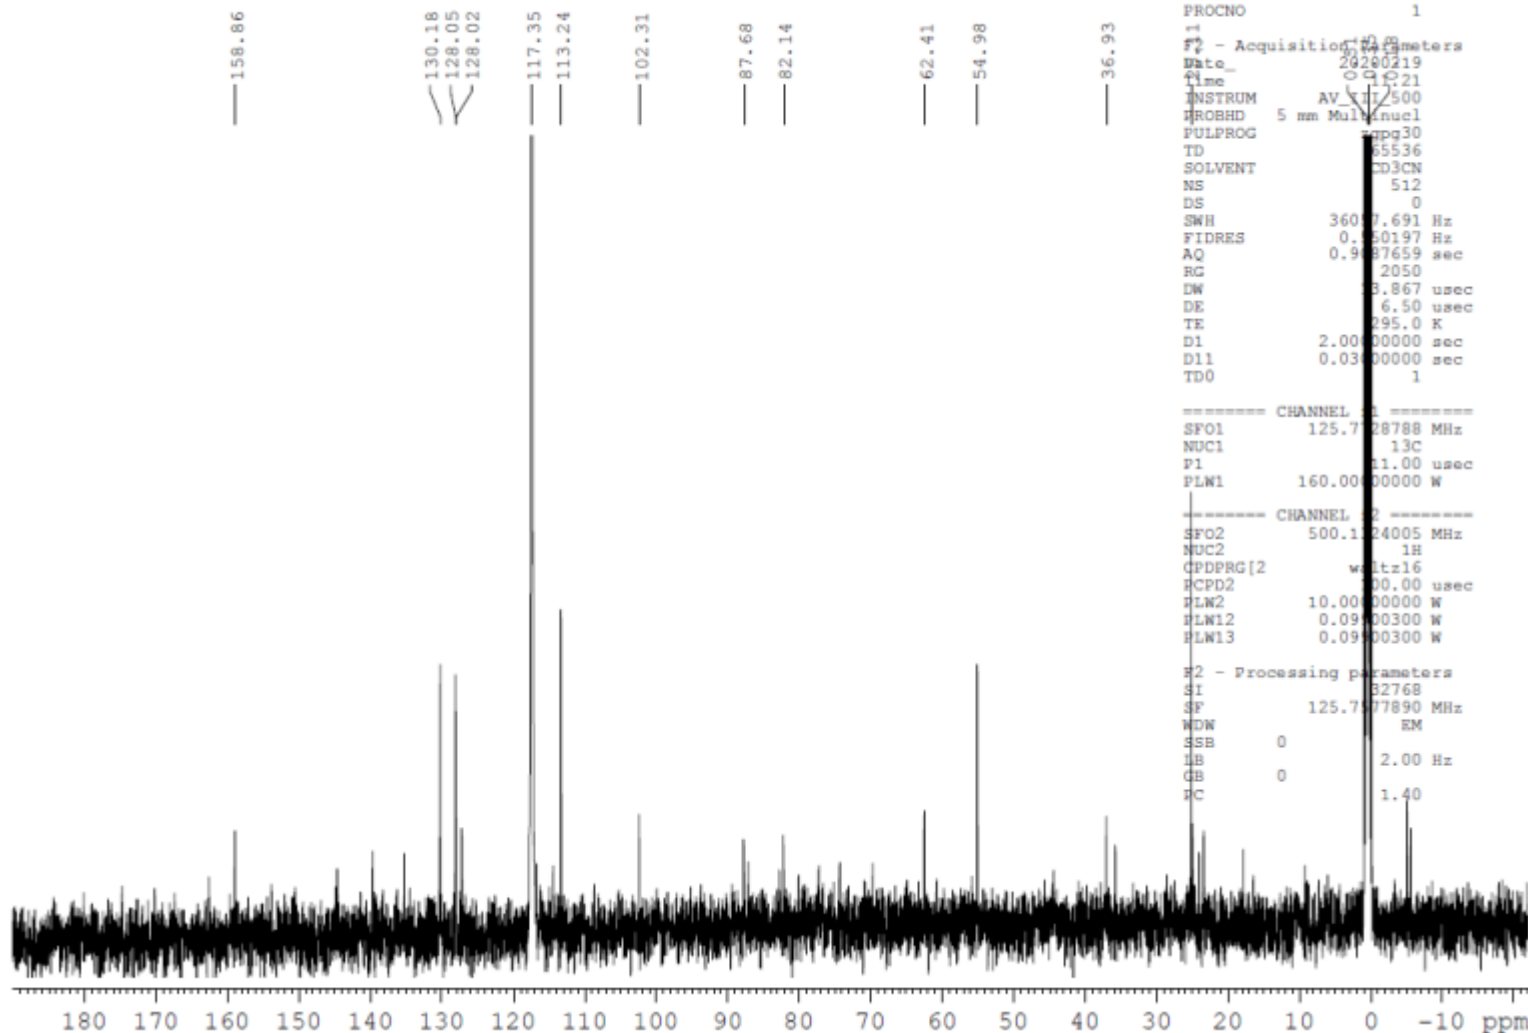

```

Current Data Parameters
NAME          jasl1902
EXPNO         4
PROCNO        1
-----
F2 - Acquisition Parameters
Date_         20200219
Time         09:45:21
INSTRUM       AV 1500
PROBHD        5 mm Multinucl
PULPROG       zgpg30
TD            65536
SOLVENT       CD3CN
NS            512
DS            0
SWH           36007.691 Hz
FIDRES        0.450197 Hz
AQ            0.9887659 sec
RG            2050
DW            9.867 usec
DE            6.50 usec
TE            295.0 K
D1            2.0000000 sec
D11           0.0300000 sec
TD0           1
-----
CHANNEL 1
SFO1          125.7628788 MHz
NUC1           13C
P1            11.00 usec
PLW1          160.0000000 W
-----
CHANNEL 2
SFO2          500.134005 MHz
NUC2           1H
CPDPRG[2]    waltz16
PCPD2         100.00 usec
PLW2          10.0000000 W
PLW12         0.0900300 W
PLW13         0.0900300 W
-----
F2 - Processing parameters
SI            32768
SF            125.7677890 MHz
WDW           EM
SSB           0
GB            2.00 Hz
CB            0
PC            1.40
  
```

Slow-eluting <sup>13</sup>C-OTP; δ (ppm, CD<sub>3</sub>CN): 162.13, 158.86, 145.23, 140.33, 135.27, 130.18, 128.05, 128.02, 117.35, 112.24, 102.31, 87.68, 82.14, 62.41, 54.98, 36.93, 25.11, 23.76, 22.80, 18.21, 9.87.

**$^{31}\text{P}$  NMR spectra for separated P-diastereomers of  $^{\text{M}}\text{N-OTP}$  and  $^{\text{T}}\text{N-OTP}$  monomers.**

**Figure S6.  $^{31}\text{P}$  NMR spectra for separated P-diastereomers of  $^{\text{M}}\text{N-OTP}$  and  $^{\text{T}}\text{N-OTP}$  monomers.**



KJ-Af-2'OMe

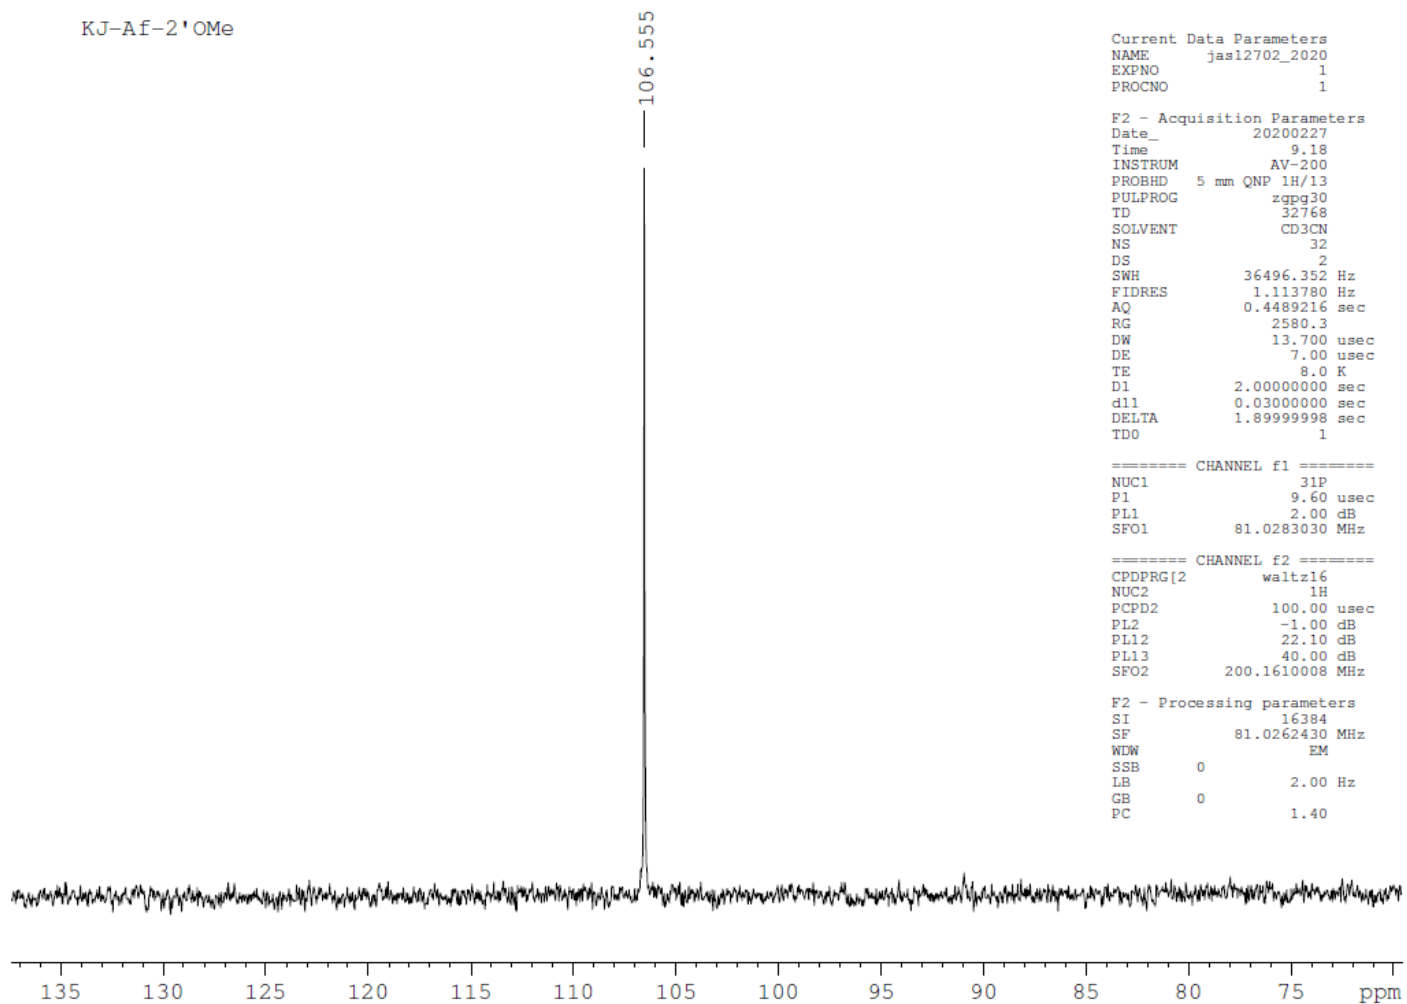

Fast-eluting <sup>M</sup>A-OTP in CD<sub>3</sub>CN; δ (ppm)

KJ-As-2'OMe

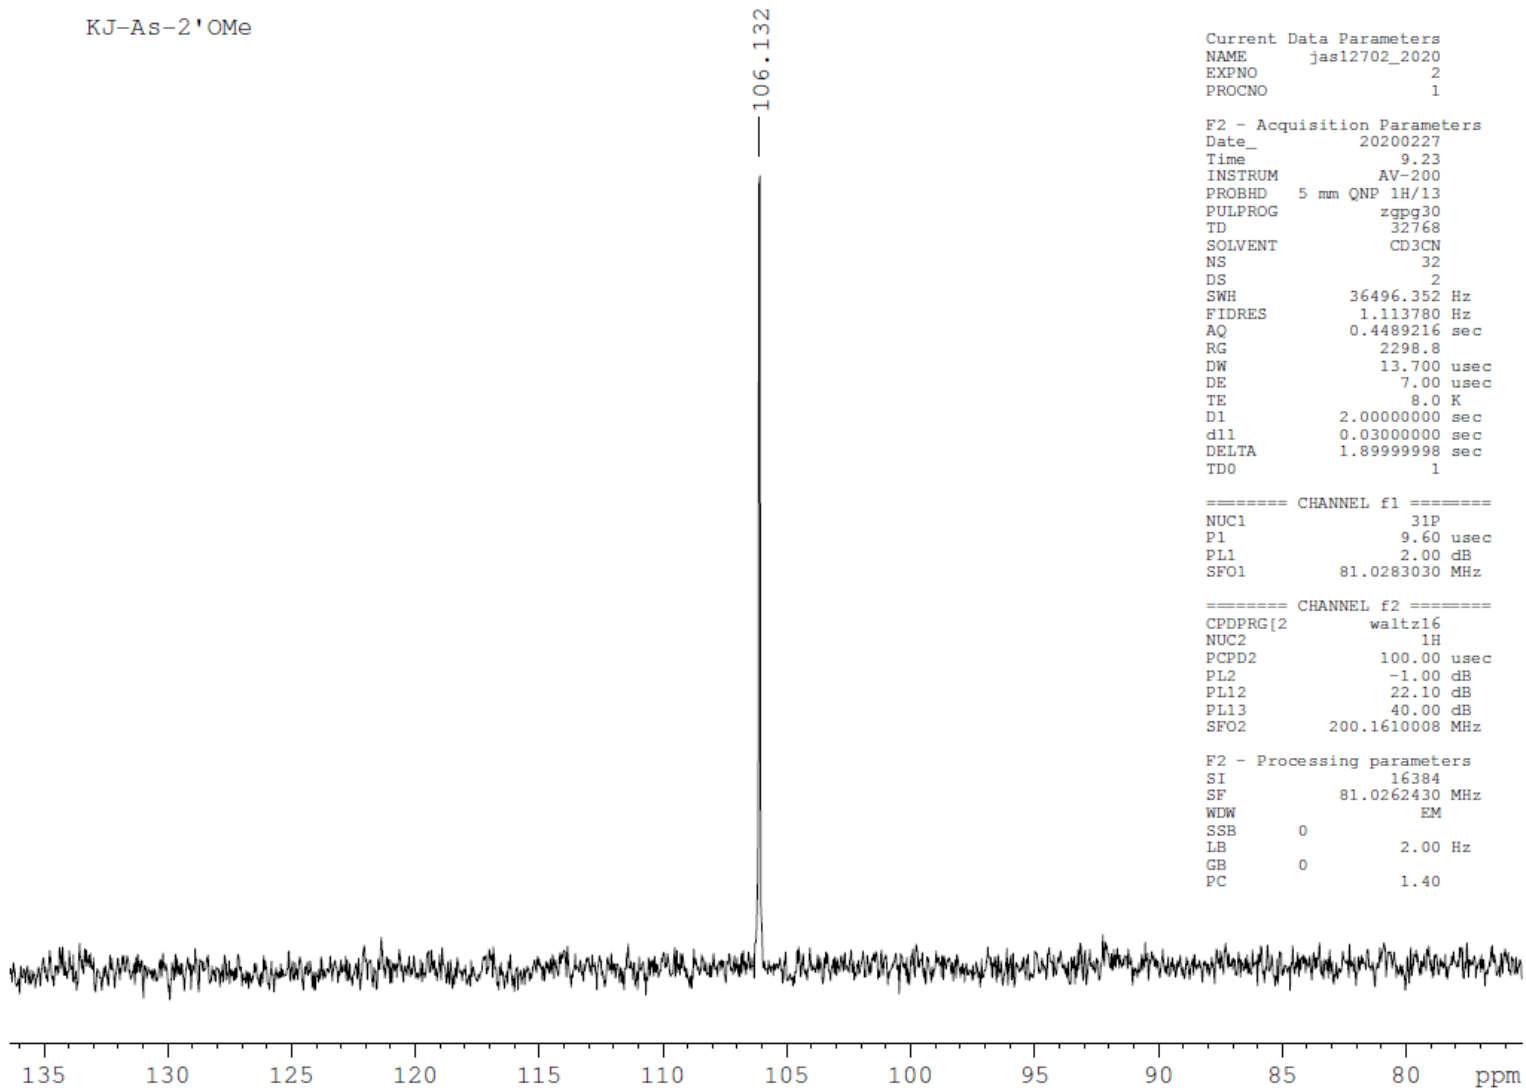

Slow-eluting <sup>M</sup>A-OTP in CD<sub>3</sub>CN; δ (ppm)

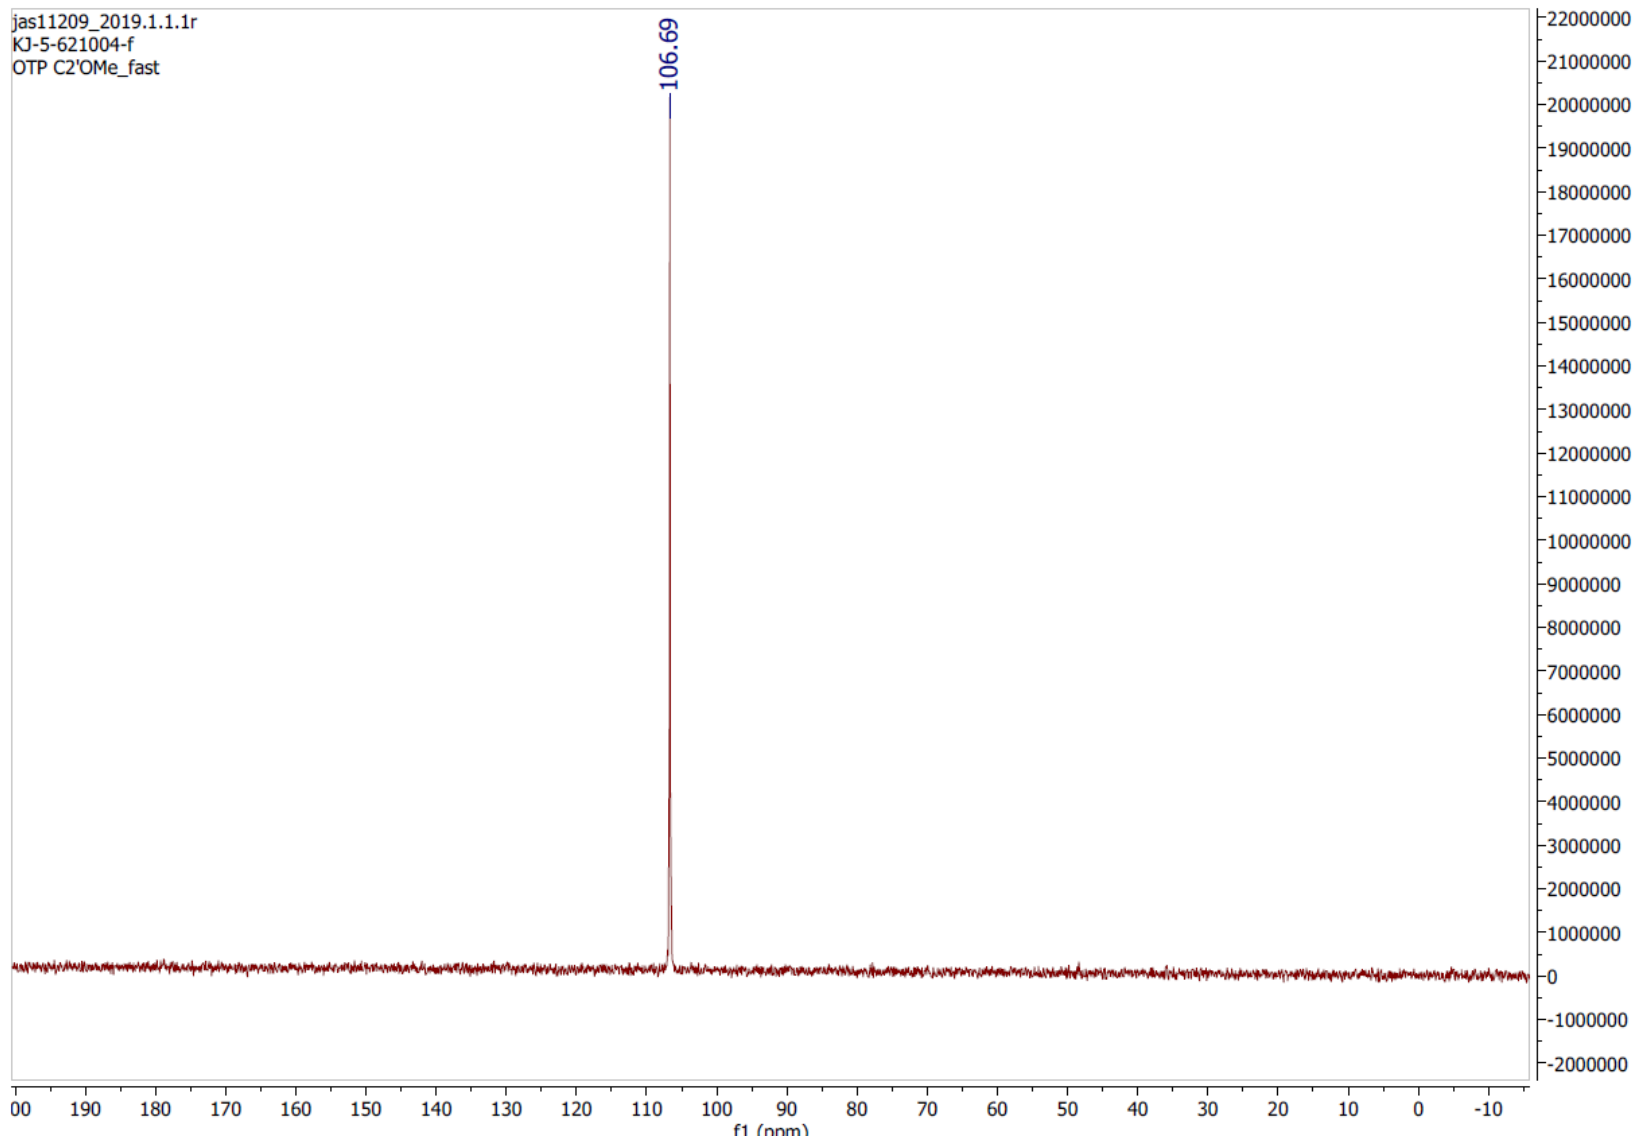

Fast-eluting  $^{13}\text{C}$ -OTP in  $\text{CD}_3\text{CN}$ ;  $\delta$  (ppm)

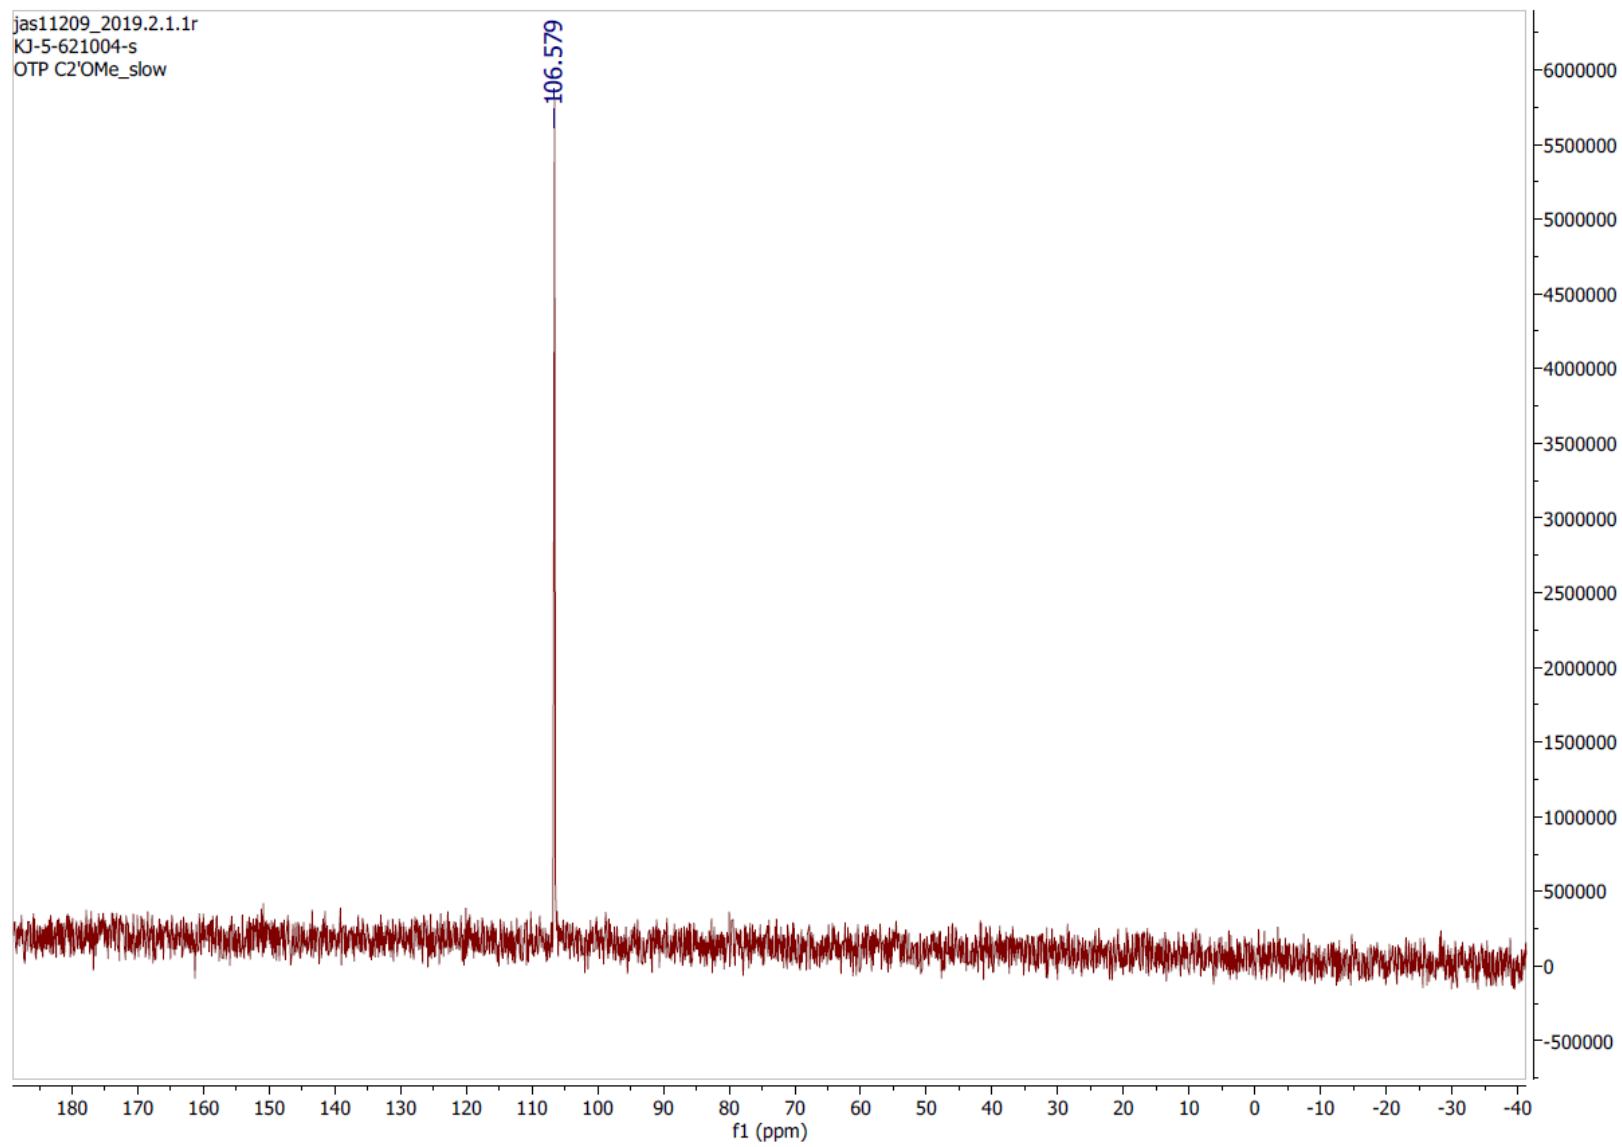

Slow-eluting  $^{13}\text{C}$ -OTP in  $\text{CD}_3\text{CN}$ ;  $\delta$  (ppm)

KJ-OTP G2'OMe-fast

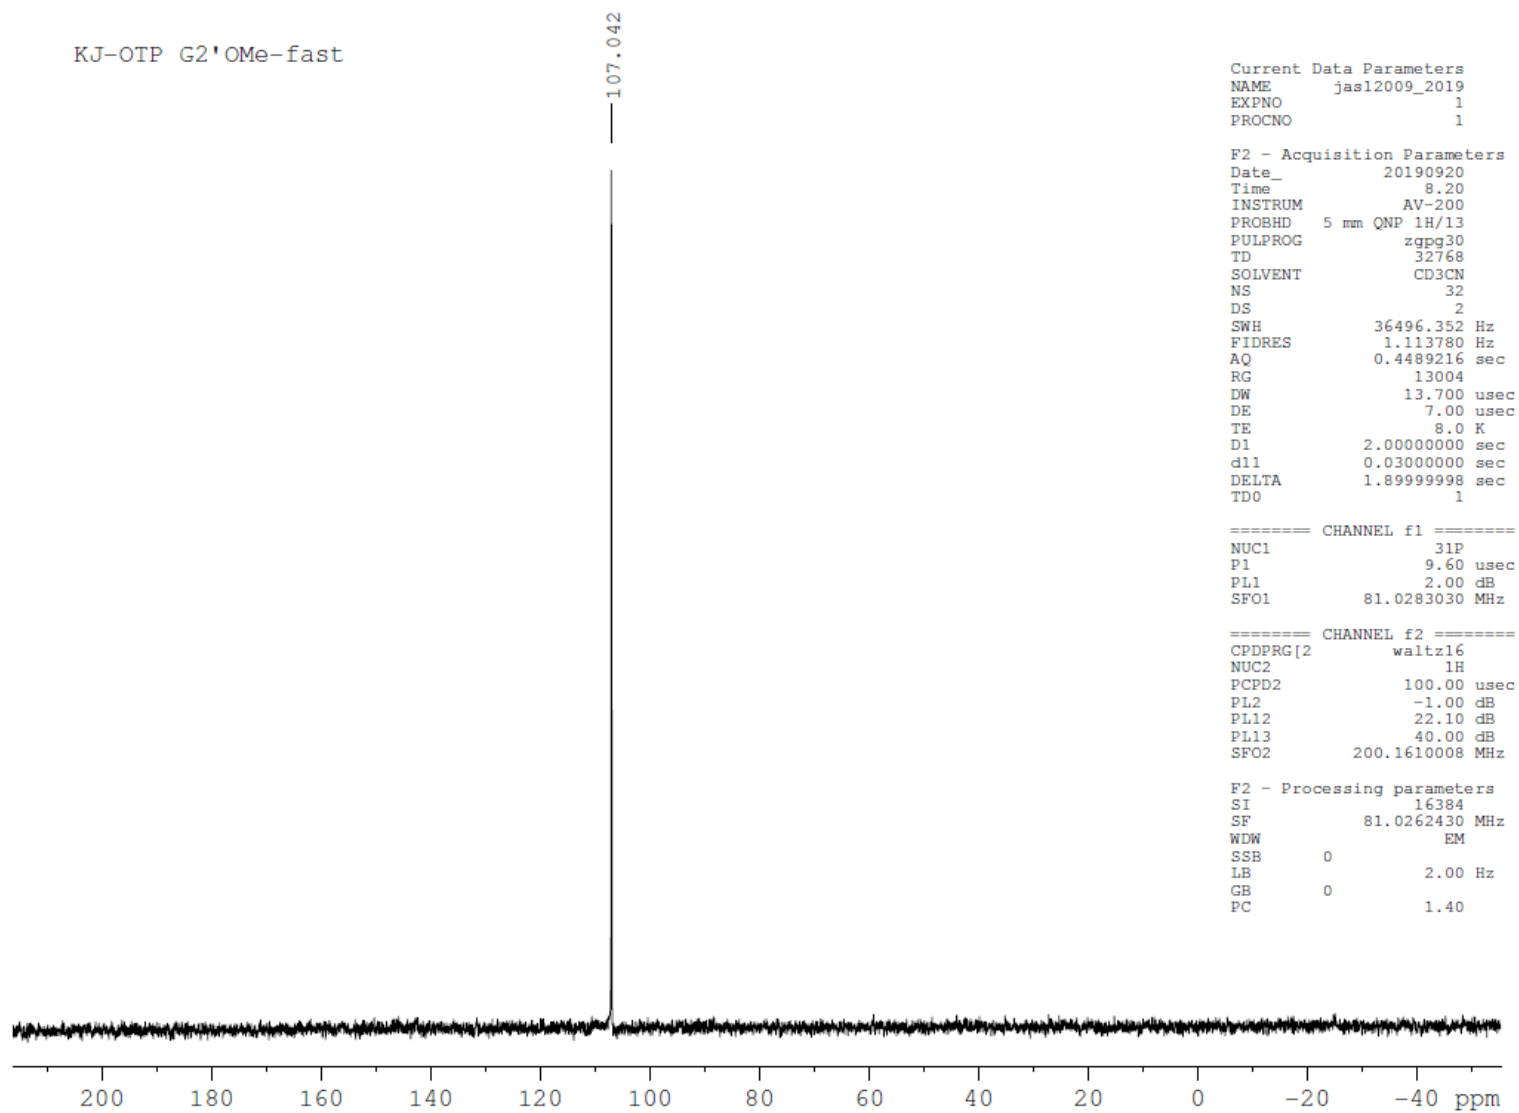

Current Data Parameters  
NAME jas12009\_2019  
EXPNO 1  
PROCNO 1

F2 - Acquisition Parameters  
Date\_ 20190920  
Time 8.20  
INSTRUM AV-200  
PROBHD 5 mm QNP 1H/13  
PULPROG zgpg30  
TD 32768  
SOLVENT CD3CN  
NS 32  
DS 2  
SWH 36496.352 Hz  
FIDRES 1.113780 Hz  
AQ 0.4489216 sec  
RG 13004  
DW 13.700 usec  
DE 7.00 usec  
TE 8.0 K  
D1 2.00000000 sec  
d11 0.03000000 sec  
DELTA 1.89999998 sec  
TDO 1

===== CHANNEL f1 =====  
NUC1 31P  
P1 9.60 usec  
PL1 2.00 dB  
SFO1 81.0283030 MHz

===== CHANNEL f2 =====  
CPDPRG[2] waltz16  
NUC2 1H  
PCPD2 100.00 usec  
PL2 -1.00 dB  
PL12 22.10 dB  
PL13 40.00 dB  
SFO2 200.1610008 MHz

F2 - Processing parameters  
SI 16384  
SF 81.0262430 MHz  
WDW EM  
SSB 0  
LB 2.00 Hz  
GB 0  
PC 1.40

Fast-eluting <sup>M</sup>G-OTP in CD<sub>3</sub>CN; δ (ppm)

KJ-OTP G2'OMe-slow

106.688

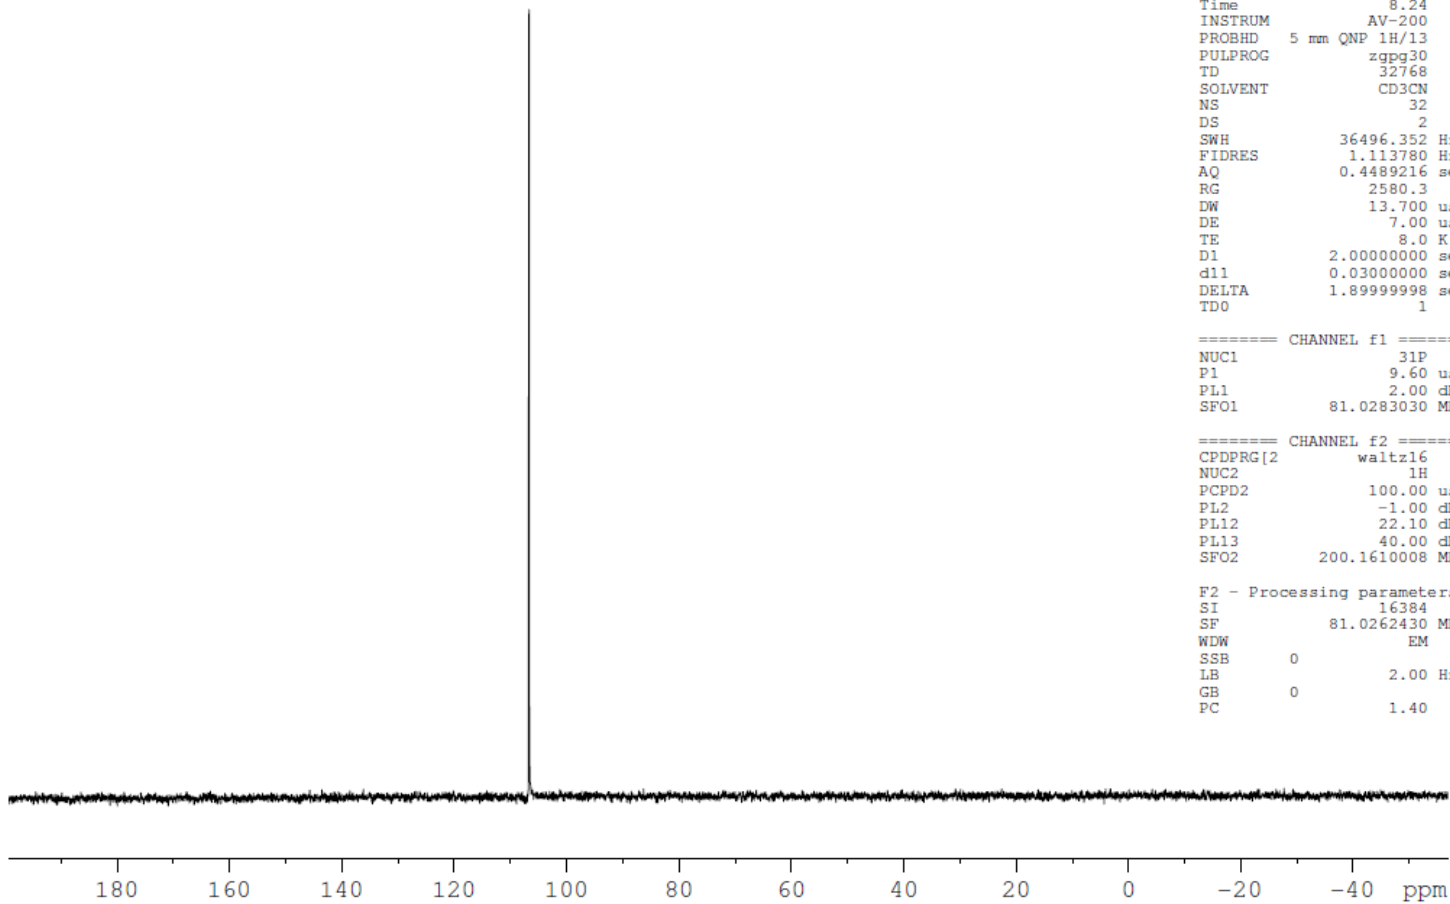

```
Current Data Parameters
NAME      jas12009_2019
EXPNO     2
PROCNO    1

F2 - Acquisition Parameters
Date_     20190920
Time      8.24
INSTRUM   AV-200
PROBHD    5 mm QNP 1H/13
PULPROG   zgpg30
TD         32768
SOLVENT   CD3CN
NS         32
DS         2
SWH        36496.352 Hz
FIDRES     1.113780 Hz
AQ         0.4489216 sec
RG         2580.3
DW         13.700 usec
DE         7.00 usec
TE         8.0 K
D1         2.00000000 sec
d11        0.03000000 sec
DELTA     1.89999999 sec
TD0        1

===== CHANNEL f1 =====
NUC1       31P
P1         9.60 usec
PL1        2.00 dB
SFO1       81.0283030 MHz

===== CHANNEL f2 =====
CPDPRG[2] waltz16
NUC2       1H
PCPD2      100.00 usec
PL2        -1.00 dB
PL12       22.10 dB
PL13       40.00 dB
SFO2       200.1610008 MHz

F2 - Processing parameters
SI         16384
SF         81.0262430 MHz
WDW        EM
SSB        0
LB         2.00 Hz
GB         0
PC         1.40
```

Slow-eluting <sup>M</sup>G-OTP in CD<sub>3</sub>CN; δ (ppm)

KJ-OTP\_U\_2'OMe\_fast

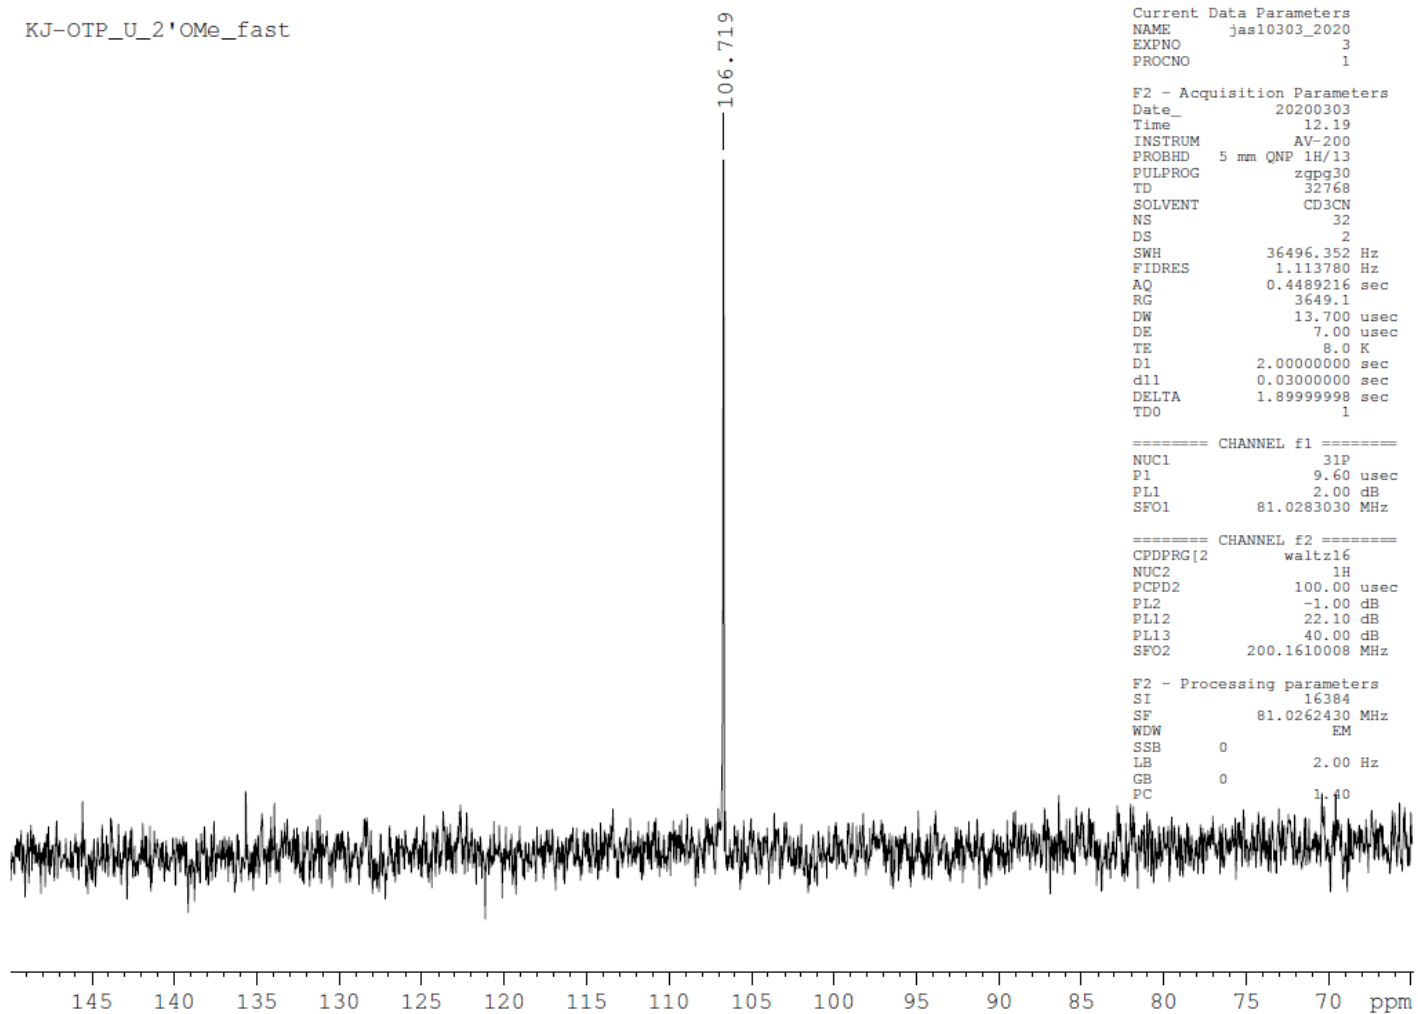

Fast-eluting <sup>M</sup>U-OTP in CD<sub>3</sub>CN; δ (ppm)

KJ-OTP\_U\_2'OMe\_slow

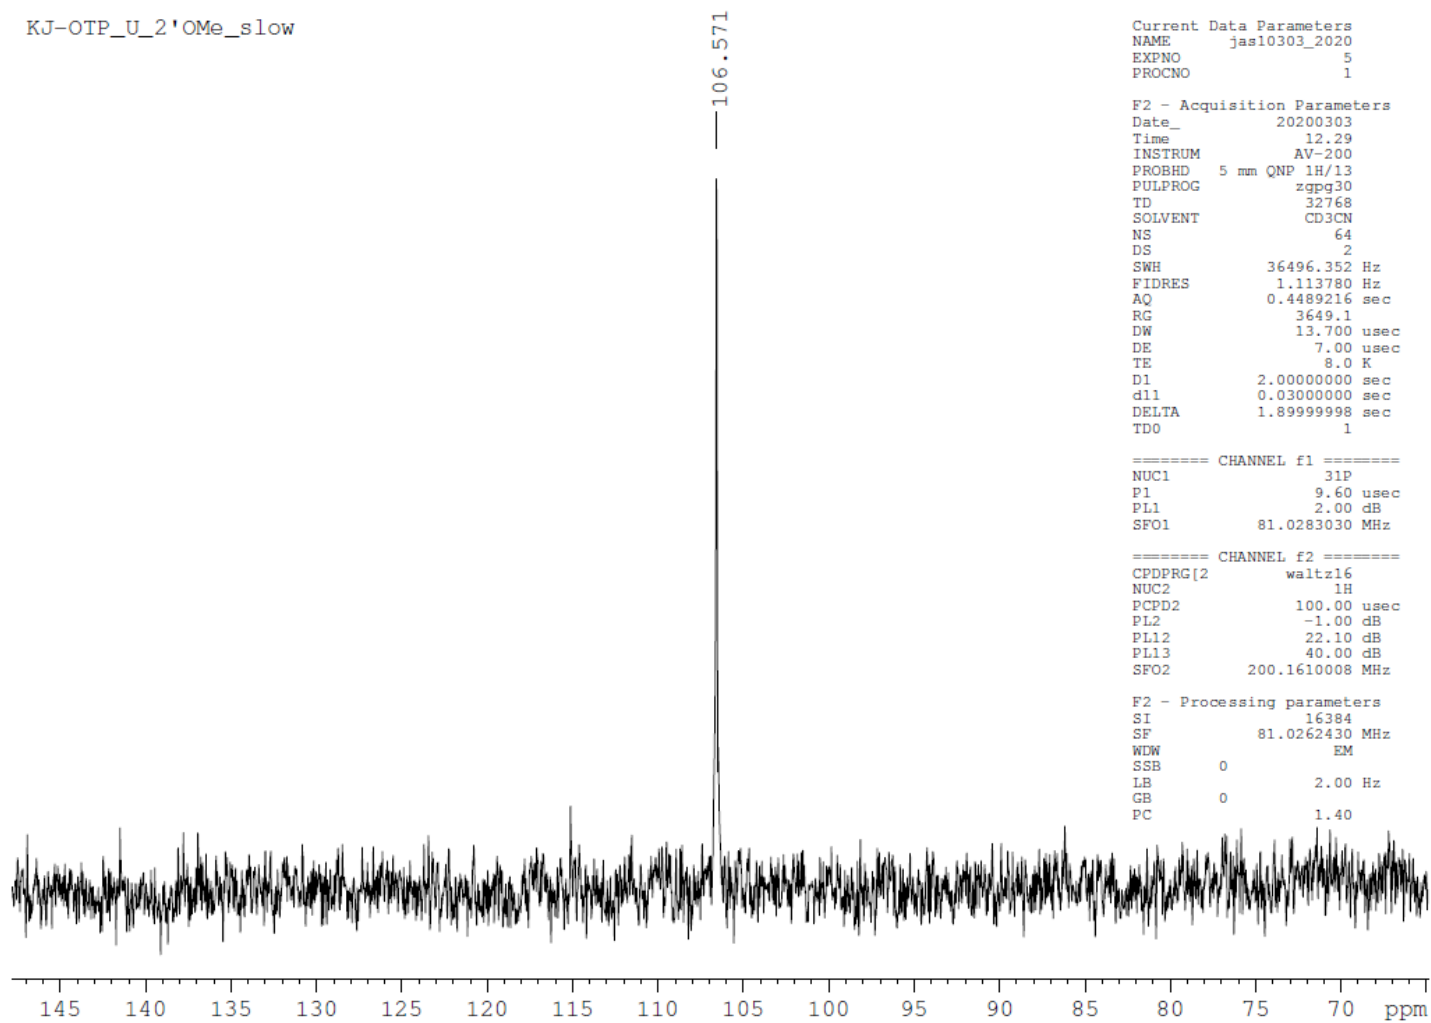

```
Current Data Parameters
NAME      jas10303_2020
EXPNO     5
PROCNO    1

F2 - Acquisition Parameters
Date_     20200303
Time      12.29
INSTRUM   AV-200
PROBHD    5 mm QNP 1H/13
PULPROG   zgpg30
TD         32768
SOLVENT   CD3CN
NS         64
DS         2
SWH        36496.352 Hz
FIDRES     1.113780 Hz
AQ         0.4489216 sec
RG         3649.1
DW         13.700 usec
DE         7.00 usec
TE         8.0 K
D1         2.00000000 sec
d11        0.03000000 sec
DELTA     1.89999998 sec
TDO        1

===== CHANNEL f1 =====
NUC1       31P
P1         9.60 usec
PL1        2.00 dB
SFO1       81.0283030 MHz

===== CHANNEL f2 =====
CPDPRG[2] waltz16
NUC2       1H
PCPD2      100.00 usec
PL2        -1.00 dB
PL12       22.10 dB
PL13       40.00 dB
SFO2       200.1610008 MHz

F2 - Processing parameters
SI         16384
SF         81.0262430 MHz
WDW        EM
SSB        0
LB         2.00 Hz
GB         0
PC         1.40
```

Slow-eluting <sup>31</sup>P-OTP in CD<sub>3</sub>CN; δ (ppm)



KJ-OTPA\_2'OTBDMS, fast

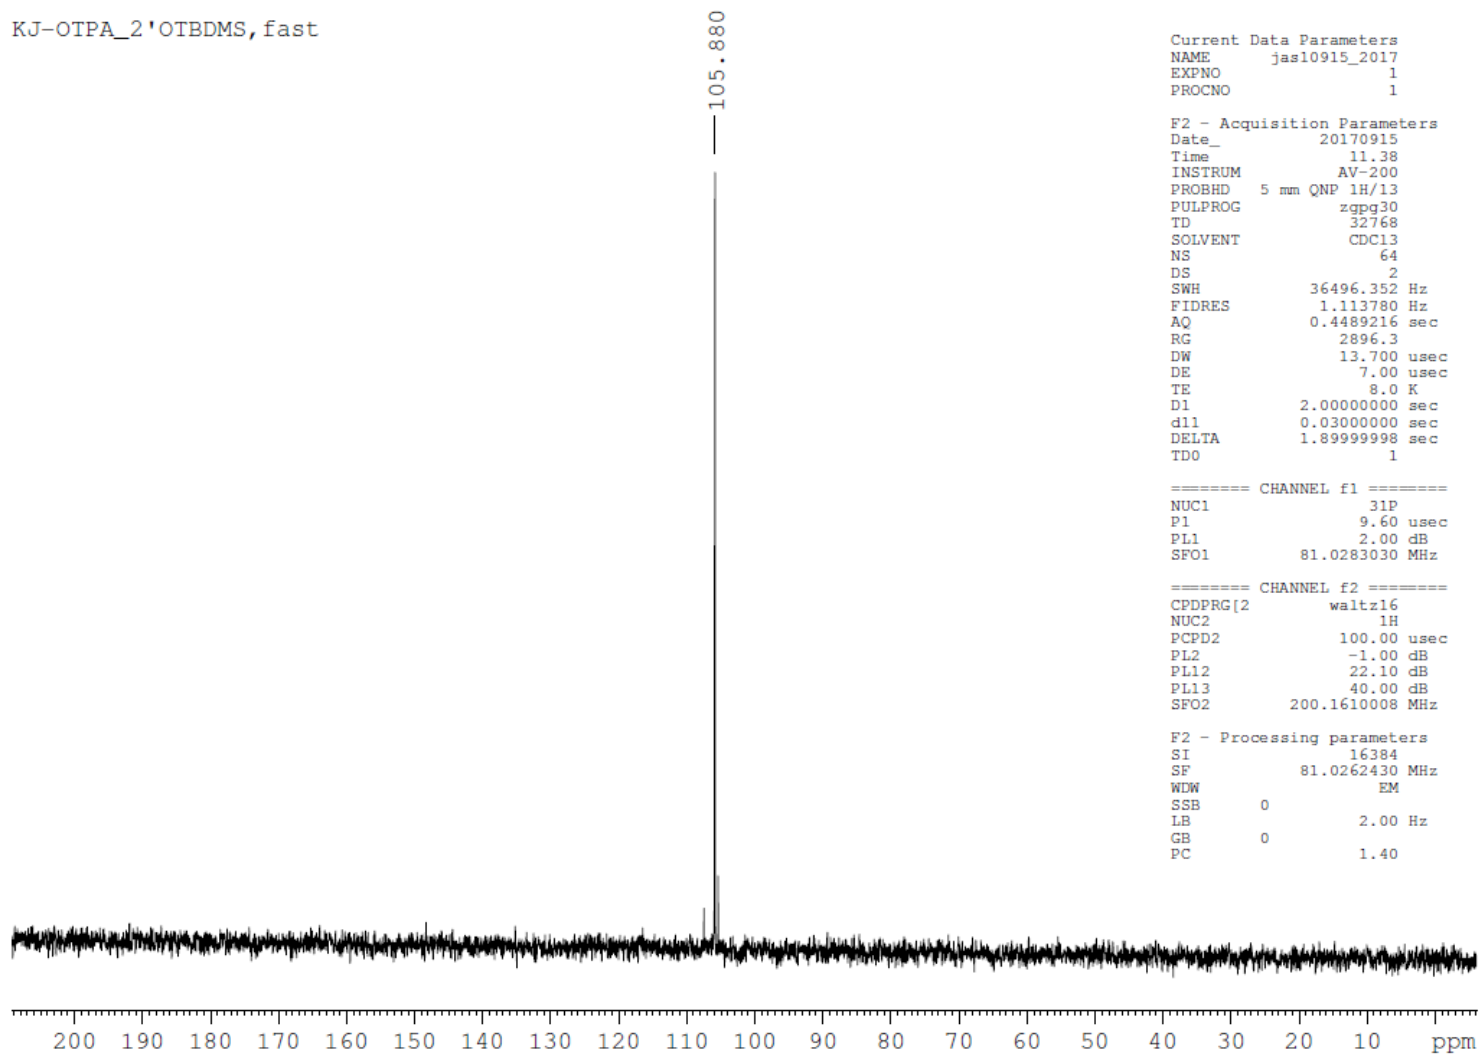

Fast-eluting <sup>1</sup>A-OTP in CD<sub>3</sub>CN; δ (ppm)

KJ-OTPA\_2'OTBDMS,slow

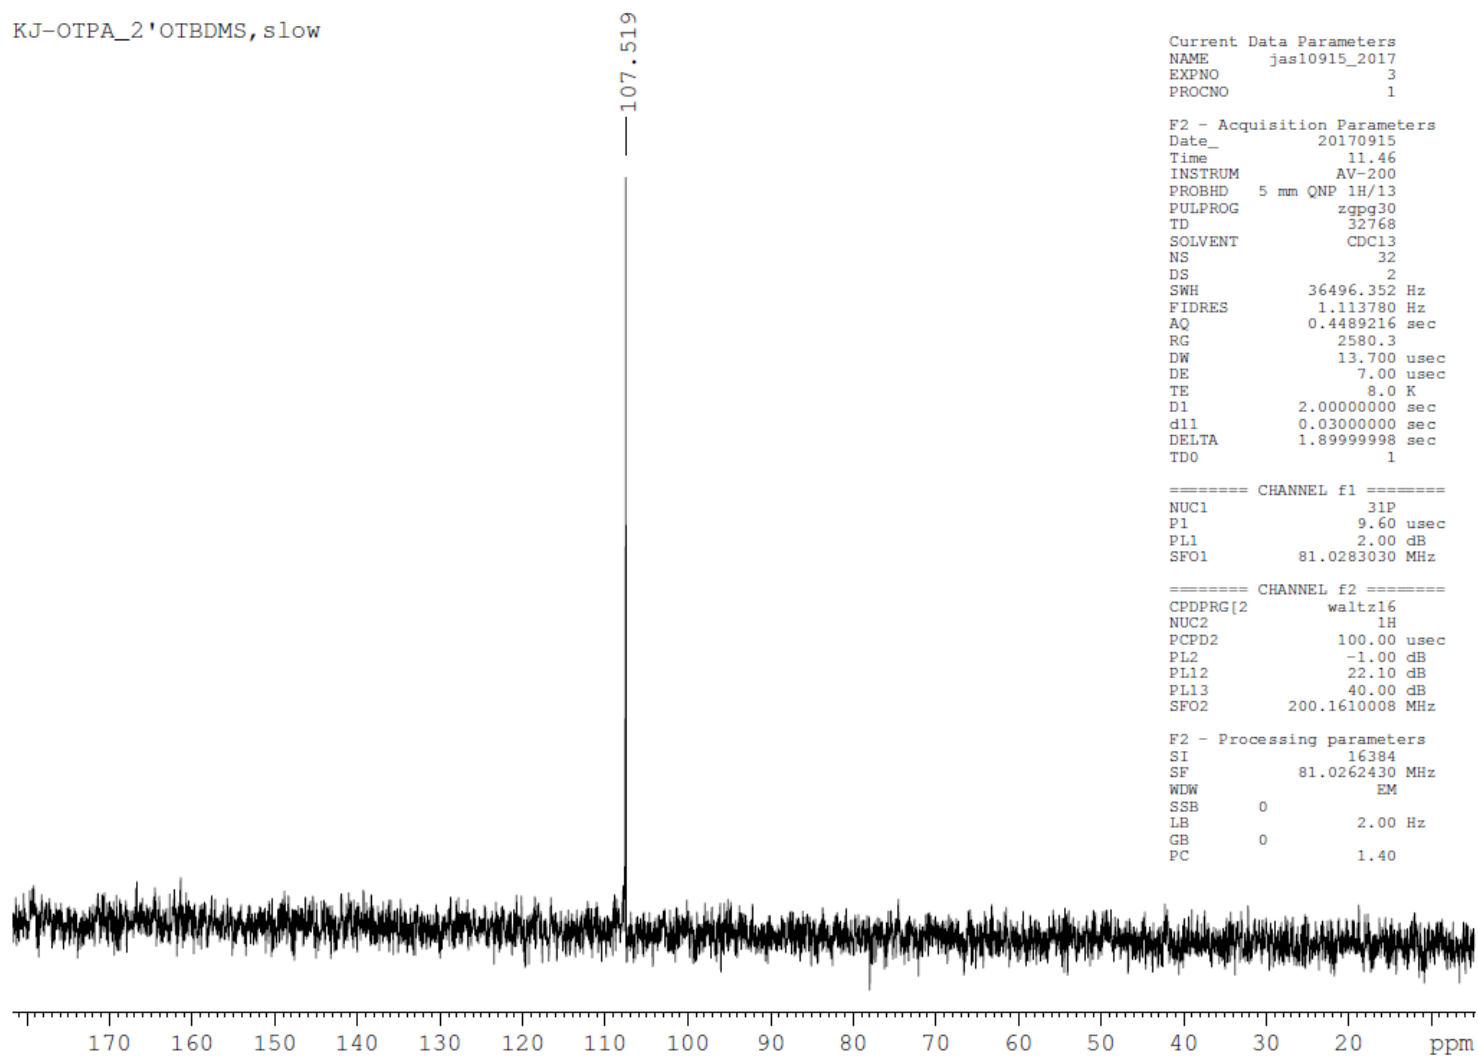

Slow-eluting <sup>1</sup>A-OTP in CD<sub>3</sub>CN; δ (ppm)

KJ-Cf-2'Otbdms

106.966

```
Current Data Parameters
NAME      jas12702_2020
EXPNO     3
PROCNO    1

F2 - Acquisition Parameters
Date_     20200227
Time      9.28
INSTRUM   AV-200
PROBHD    5 mm QNP 1H/13
PULPROG   zgpg30
TD        32768
SOLVENT   CD3CN
NS        32
DS        2
SWH       36496.352 Hz
FIDRES    1.113780 Hz
AQ        0.4489216 sec
RG        3649.1
DW        13.700 usec
DE        7.00 usec
TE        8.0 K
D1        2.00000000 sec
d11       0.03000000 sec
DELTA     1.89999998 sec
TD0       1

===== CHANNEL f1 =====
NUC1      31P
P1        9.60 usec
PL1       2.00 dB
SFO1     81.0283030 MHz

===== CHANNEL f2 =====
CPDPRG[2] waltz16
NUC2      1H
PCPD2     100.00 usec
PL2       -1.00 dB
PL12      22.10 dB
PL13      40.00 dB
SFO2     200.1610008 MHz

F2 - Processing parameters
SI        16384
SF        81.0262430 MHz
WDW       EM
SSB       0
LB        2.00 Hz
GB        0
PC        1.40
```

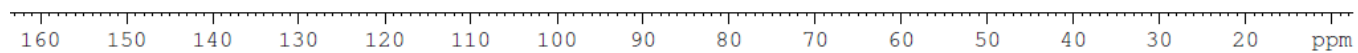

Fast-eluting <sup>13</sup>C-OTP in CD<sub>3</sub>CN; δ (ppm)

KJ-Cs-2'Otbdms

107.022

```
Current Data Parameters
NAME      jas12702_2020
EXPNO     6
PROCNO    1

F2 - Acquisition Parameters
Date_     20200227
Time      9.40
INSTRUM   AV-200
PROBHD    5 mm QNP 1H/13
PULPROG   zgpg30
TD        32768
SOLVENT   CD3CN
NS        32
DS        2
SWH       36496.352 Hz
FIDRES    1.113780 Hz
AQ        0.4489216 sec
RG        3649.1
DW        13.700 usec
DE        7.00 usec
TE        8.0 K
D1        2.00000000 sec
d11       0.03000000 sec
DELTA     1.89999998 sec
TD0       1

===== CHANNEL f1 =====
NUC1      31P
P1        9.60 usec
PL1       2.00 dB
SFO1     81.0283030 MHz

===== CHANNEL f2 =====
CPDPRG[2] waltz16
NUC2      1H
PCPD2    100.00 usec
PL2      -1.00 dB
PL12     22.10 dB
PL13     40.00 dB
SFO2     200.1610008 MHz

F2 - Processing parameters
SI        16384
SF        81.0262430 MHz
WDW       EM
SSB       0
LB        2.00 Hz
GB        0
PC        1.40
```

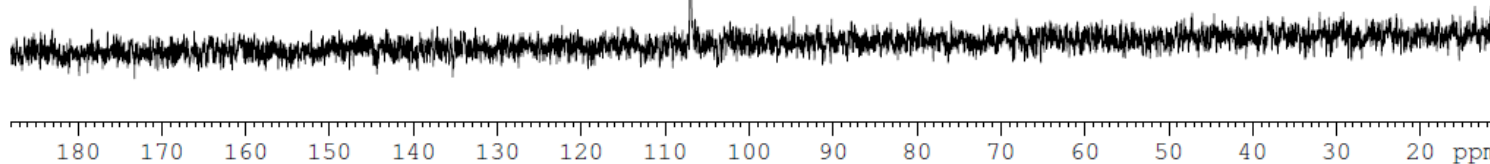

Slow-eluting <sup>13</sup>C-OTP in CD<sub>3</sub>CN; δ (ppm)

KJ-OTP\_G\_2'OTBDMS\_fast

106.244

```
Current Data Parameters
NAME      jas10303_2020
EXPNO     1
PROCNO    1

F2 - Acquisition Parameters
Date_     20200303
Time      12.09
INSTRUM   AV-200
PROBHD    5 mm QNP 1H/13
PULPROG   zgpg30
TD        32768
SOLVENT   CD3CN
NS        64
DS        2
SWH       36496.352 Hz
FIDRES    1.113780 Hz
AQ        0.4489216 sec
RG        4597.6
DW        13.700 usec
DE        7.00 usec
TE        8.0 K
D1        2.00000000 sec
d11       0.03000000 sec
DELTA     1.899999998 sec
TDO       1

===== CHANNEL f1 =====
NUC1      31P
P1        9.60 usec
PL1       2.00 dB
SFO1     81.0283030 MHz

===== CHANNEL f2 =====
CPDPRG[2] waltz16
NUC2      1H
PCPD2     100.00 usec
PL2       -1.00 dB
PL12      22.10 dB
PL13      40.00 dB
SFO2     200.1610008 MHz

F2 - Processing parameters
SI        16384
SF        81.0262430 MHz
WDW       EM
SSB       0
LB        2.00 Hz
GB        0
PC        1.40
```

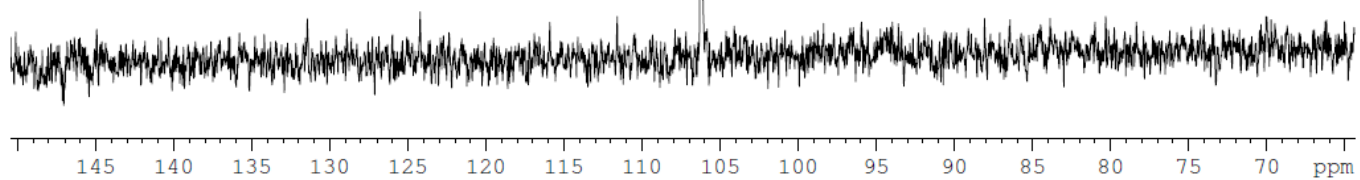

Fast-eluting <sup>1</sup>G-OTP in CD<sub>3</sub>CN; δ (ppm)

KJ-OTP\_G\_2'OTBDMS\_slow

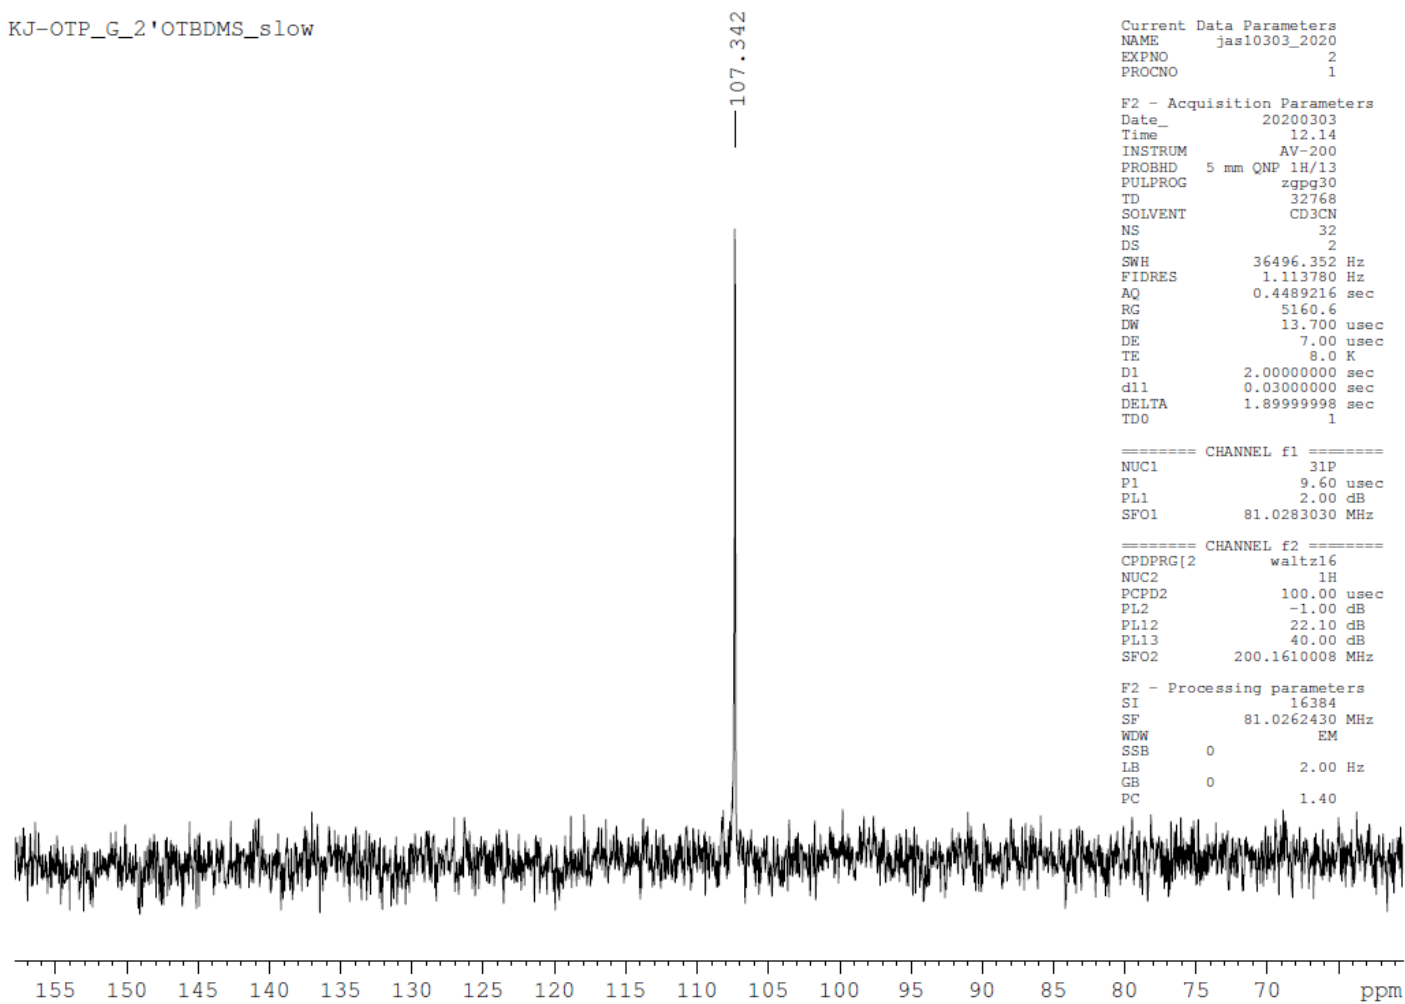

Slow-eluting <sup>1</sup>G-OTP in CD<sub>3</sub>CN; δ (ppm)

KJ-OTP\_U\_2'OTBDMS\_fast

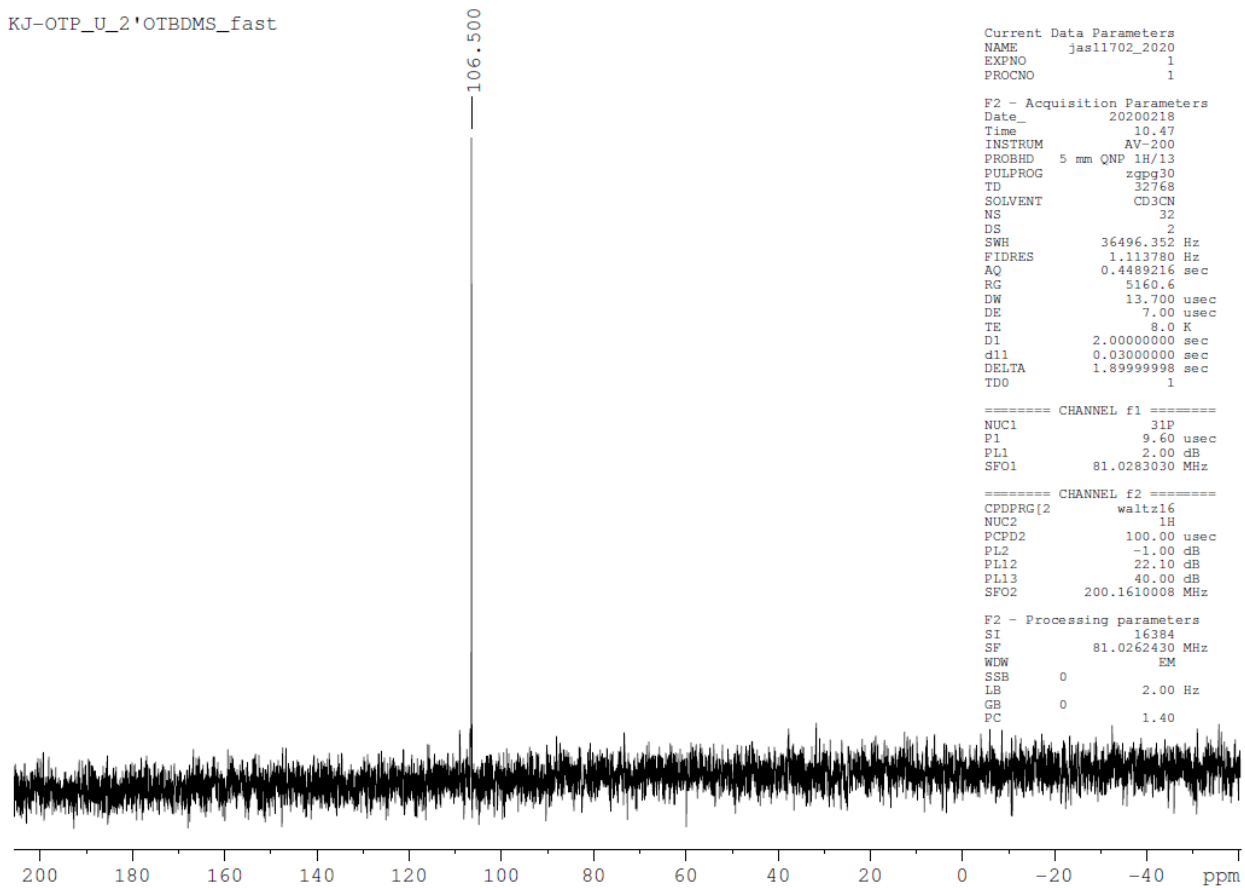

Current Data Parameters  
NAME jas11702\_2020  
EXPNO 1  
PROCNO 1

F2 - Acquisition Parameters  
Date\_ 20200218  
Time 10.47  
INSTRUM AV-200  
PROBHD 5 mm QNP 1H/13  
PULPROG zgpg30  
TD 32768  
SOLVENT CD3CN  
NS 32  
DS 2  
SWH 36496.352 Hz  
FIDRES 1.113780 Hz  
AQ 0.4489216 sec  
RG 5160.6  
DW 13.700 usec  
DE 7.00 usec  
TE 8.0 K  
D1 2.00000000 sec  
d11 0.03000000 sec  
DELTA 1.89999998 sec  
TD0 1

==== CHANNEL f1 =====  
NUC1 31P  
P1 9.60 usec  
PL1 2.00 dB  
SFO1 81.0283030 MHz

==== CHANNEL f2 =====  
CPDPRG[2] waltz16  
NUC2 1H  
PCPD2 100.00 usec  
PL2 -1.00 dB  
PL12 22.10 dB  
PL13 40.00 dB  
SFO2 200.1610008 MHz

F2 - Processing parameters  
SI 16384  
SF 81.0262430 MHz  
WDW EM  
SSB 0  
LB 2.00 Hz  
GB 0  
PC 1.40

Fast-eluting <sup>1</sup>U-OTP in CD<sub>3</sub>CN; δ (ppm)

KJ-OTP\_U\_2'OTBDMS\_slow

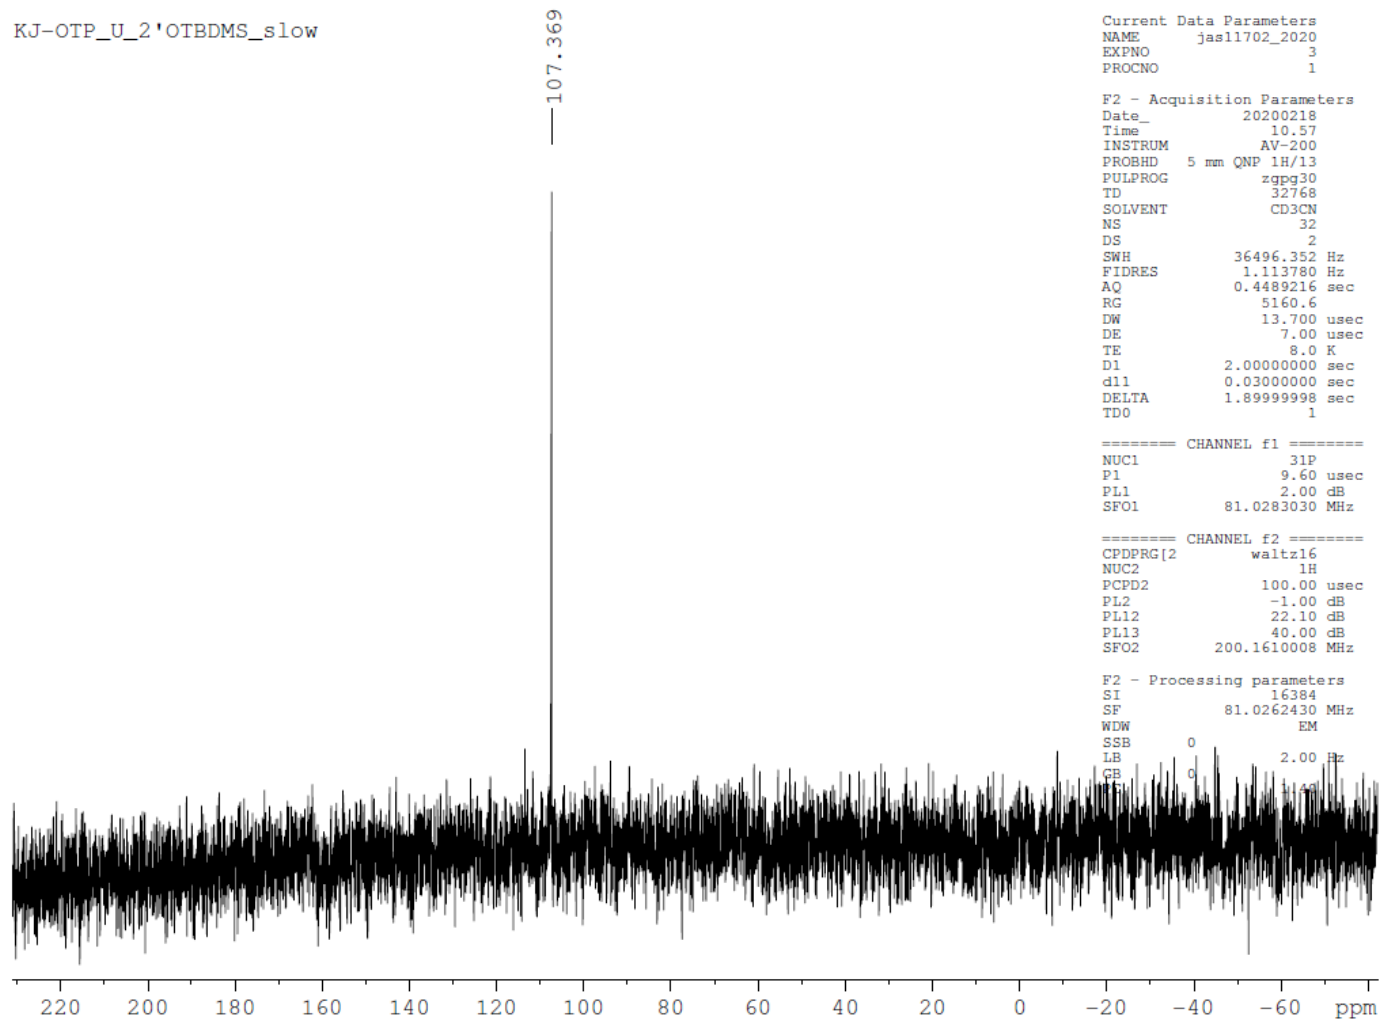

Slow-eluting <sup>13</sup>C-OTP in CD<sub>3</sub>CN; δ (ppm)



## Crystallography of the detritylated *fast-eluting 3a* monomer.

### Details of X-ray Data Collection and Reduction.

X-ray quality crystals of detritylated fast-eluting **3a** (colorless transparent plates) were grown by recrystallization from a mixture of ethyl acetate and methanol (4:1 v/v). A suitable crystal with a size of 0.11 × 0.08 × 0.02 mm was selected and mounted on a suitable support. Data were collected using an XtaLAB Synergy, Dualflex, HyPix diffractometer at  $T = 100.00(10)$  K. Data were measured with  $\omega$  scans of 0.5° per frame for 1.0/0.5 s using  $\text{CuK}_\alpha$  radiation. The maximum resolution that achieved was  $\Theta = 78.431^\circ$  (0.79 Å). The total number of runs and images was based on the strategy calculation of the program *CrysAlisPro* (Rigaku, v1.171.41.86a, 2020), and the unit cell was refined using *CrysAlisPro* based on 3835 reflections, 2% of the observed reflections.

Data reduction, scaling and absorption corrections were performed with *CrysAlisPro*. The final completeness is 99.80 % out to  $78.431^\circ$  in  $\Theta$ . Numerical absorption correction based on Gaussian integration over a multifaceted crystal model was performed with *CrysAlisPro*. The empirical absorption correction was calculated using spherical harmonics as implemented in SCALE3 ABSPACK. The absorption coefficient  $\mu$  of this material is  $2.567 \text{ mm}^{-1}$  at this wavelength ( $\lambda = 1.542 \text{ \AA}$ ) and the minimum and maximum transmissions are 0.761 and 1.000, respectively. The structure was solved and the space group  $P2_1$  (# 4) was determined with the structure solution program *XT* (Sheldrick, 2015) using intrinsic phasing with *Olex2* (Bourhis et al., 2015) as a graphical interface and refined by least squares with version 2018/3 of *ShelXL* (Sheldrick, 2015). All non-hydrogen atoms were refined anisotropically. The positions of the hydrogen atoms were calculated geometrically and refined using the riding model. The final structure was validated using CheckCif (<http://checkcif.iucr.org>) and deposited in the Cambridge Crystallographic Data Centre (CCDC) under accession number 2063388. Data acquisition, processing, and refinement statistics are shown in Table S1.

### References

1. Sheldrick GM (2015) SHELXT - Integrated space-group and crystal-structure determination. *Acta Crystallogr A Found Adv.* **71**, 3–8.
2. Bourhis LJ, Dolomanov OV, Gildea RJ, Howard JAK, Puschmann H (2015) The anatomy of a comprehensive constrained, restrained refinement program for the modern computing environment -Olex2 dissected. *Acta Crystallogr A Found Adv.* **71**, 59–75.
3. Sheldrick GM (2015) Crystal structure refinement with SHELXL. *Acta Crystallogr C Struct Chem.* **71**, 3–8.

**Table S1. The data-collection, processing and refinement statistics.**

| <b>Compound</b>                                  | <b>detritylated <i>fast-eluting</i> 3a</b>                                       |
|--------------------------------------------------|----------------------------------------------------------------------------------|
| <b>Crystal data</b>                              |                                                                                  |
| CCDC                                             | 2063388                                                                          |
| Chemical formula                                 | C <sub>30</sub> H <sub>44</sub> N <sub>5</sub> O <sub>7</sub> PS <sub>2</sub> Si |
| Formula weight                                   | 709.88                                                                           |
| Crystal system                                   | monoclinic                                                                       |
| Space group                                      | <i>P</i> 2 <sub>1</sub>                                                          |
| Temperature (K)                                  | 100.00(10)                                                                       |
| <i>a</i> [Å]                                     | 7.02449(6)                                                                       |
| <i>b</i> [Å]                                     | 39.0527(2)                                                                       |
| <i>c</i> [Å]                                     | 25.57042(18)                                                                     |
| $\beta$ (°)                                      | 89.9888(7)                                                                       |
| <i>V</i> [Å <sup>3</sup> ]                       | 7014.61(8)                                                                       |
| <br>                                             |                                                                                  |
| <i>Z</i>                                         | 8                                                                                |
| <i>d</i> <sub>calc</sub> [g/cm <sup>3</sup> ]    | 1.344                                                                            |
| Crystal dimensions [mm]                          | 0.11 × 0.08 × 0.02                                                               |
| Radiation type                                   | CuK $\alpha$                                                                     |
| Wavelength (Å)                                   | 1.54184                                                                          |
| $\mu$ [mm <sup>-1</sup> ]                        | 2.567                                                                            |
| <b>Data collection</b>                           |                                                                                  |
| Reflections measured                             | 226823                                                                           |
| Range/indices ( <i>h</i> , <i>k</i> , <i>l</i> ) | -8, 7; -49, 49; -32, 32                                                          |
| $\theta$ (max, min) [°]                          | 78.431, 2.263                                                                    |
| Total no. of unique data                         | 29194                                                                            |
| No. of observed data, $I > 2\sigma(I)$           | 27039                                                                            |
| <i>R</i> <sub>int</sub>                          | 0.0802                                                                           |

**Refinement**

|                                           |                               |
|-------------------------------------------|-------------------------------|
| $R[F^2 > 2\sigma(F^2)]$                   | 0.0563                        |
| $wR(F^2)$                                 | 0.1439                        |
| S                                         | 1.06                          |
| No. of reflections                        | 29194                         |
| No. of parameters                         | 1811                          |
| No. of restraints                         | 358                           |
| H-atom treatment                          | H-atom parameters constrained |
| $\Delta\rho$ (min, max), e/Å <sup>3</sup> | -0.365, 0.956                 |
| Absolute structure parameter              | -0.006(5)                     |

---

# MALDI-TOF mass spectra recorded for chimeric PS-oligonucleotides.

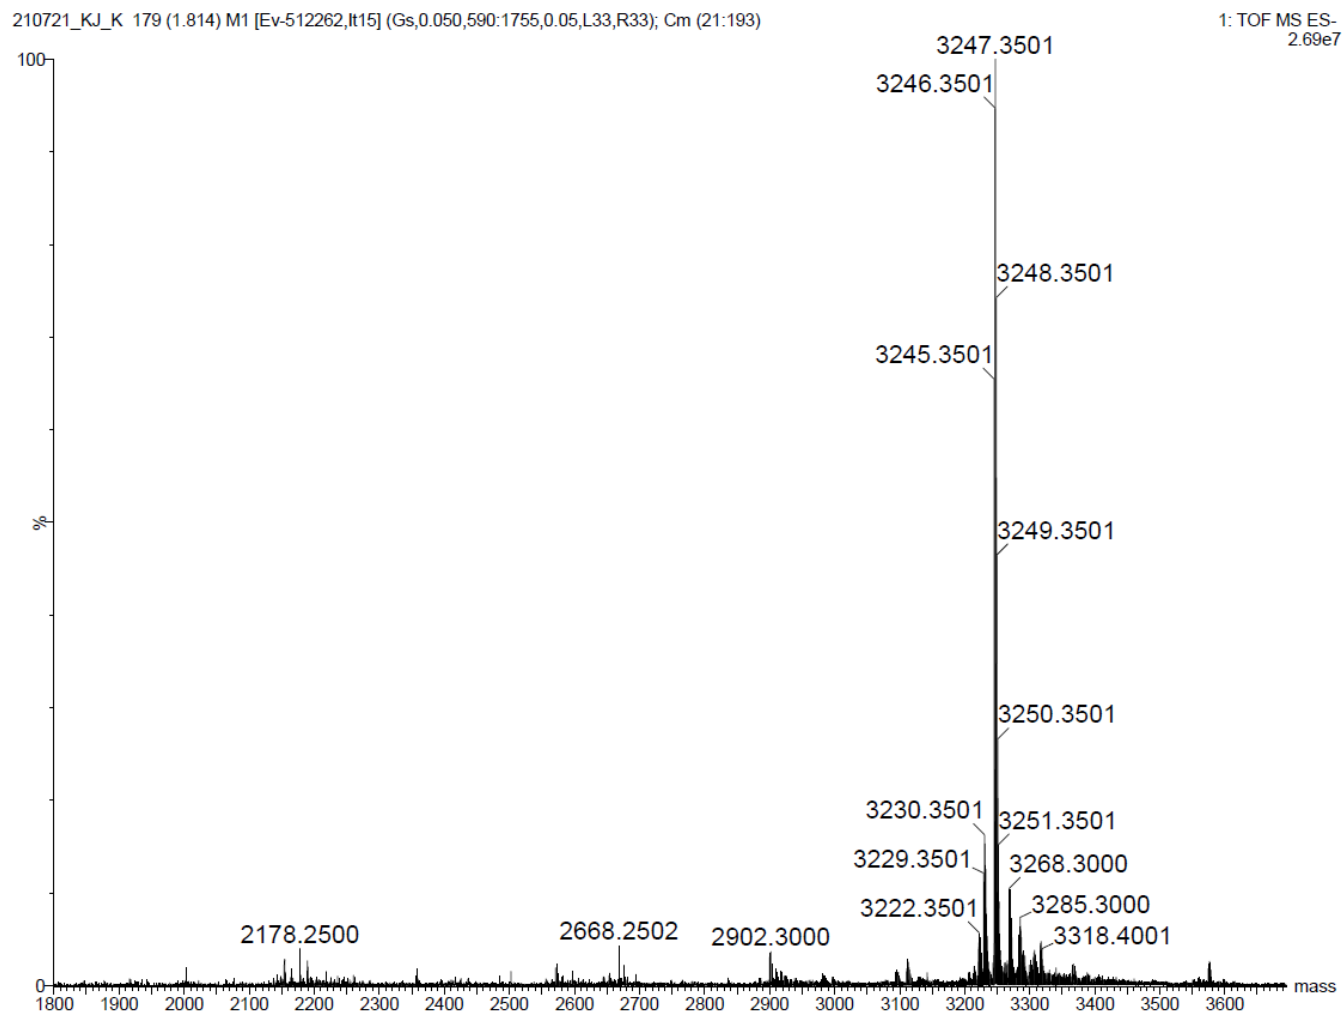

<sup>M</sup>AR oligomer

210721\_KJ\_J 41 (0.437) M1 [Ev-499324,It16] (Gs,0.050,570:1689,0.05,L33,R33); Cm (36:197)

1: TOF MS ES-  
1.89e7

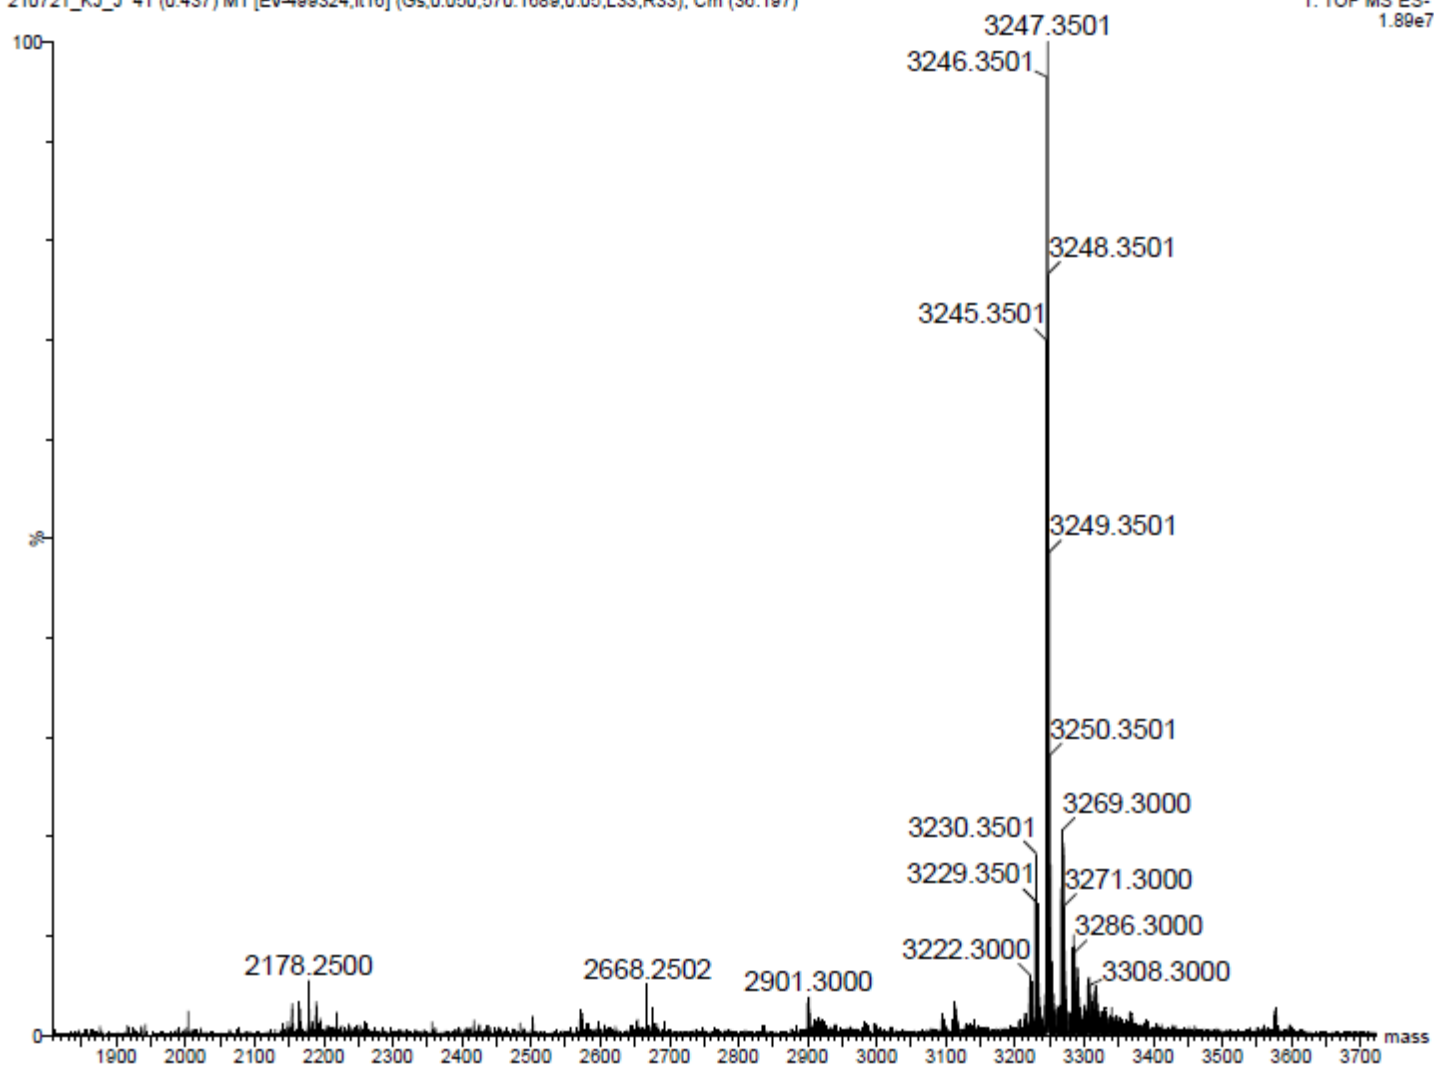

<sup>M</sup>AS oligomer

210415\_KJ\_4 137 (1.397) M1 [Ev-480173,It13] (Gs,0.032,802:1757,0.01,L33,R33); Cm (116:197)

1: TOF MS ES-  
3.05e6

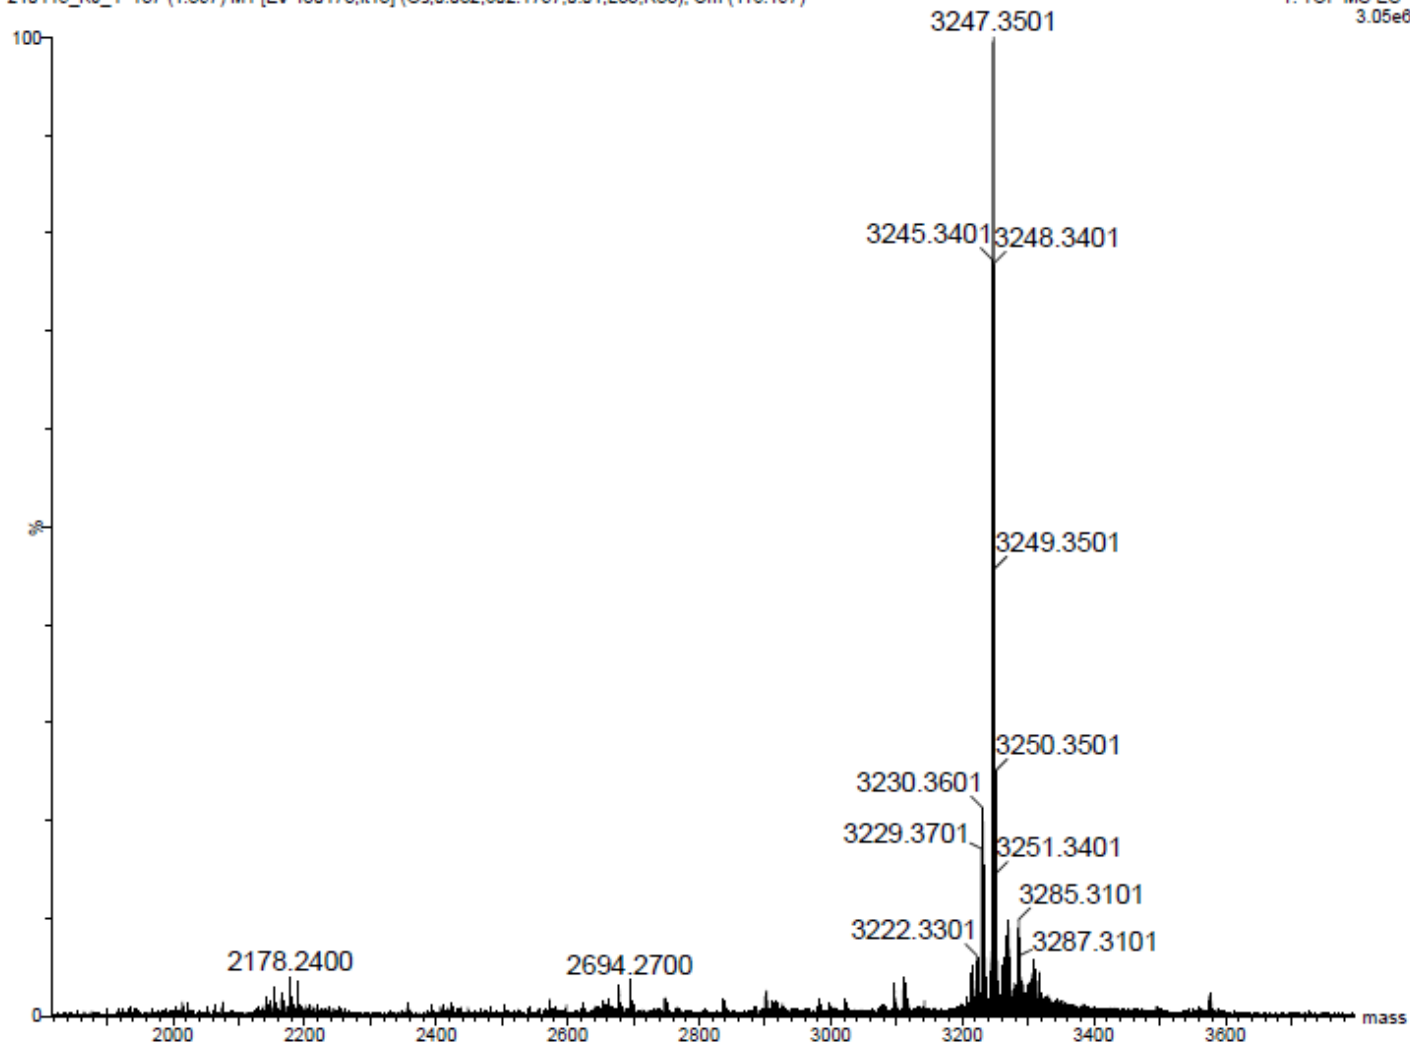

<sup>M</sup>CR oligomer

210901\_KJ\_C2 75 (0.774) M1 [Ev-418008,I14] (Gs,0.050,884:1702,0.05,L33,R33); Cm (61:191)

1: TOF MS ES-  
1.07e7

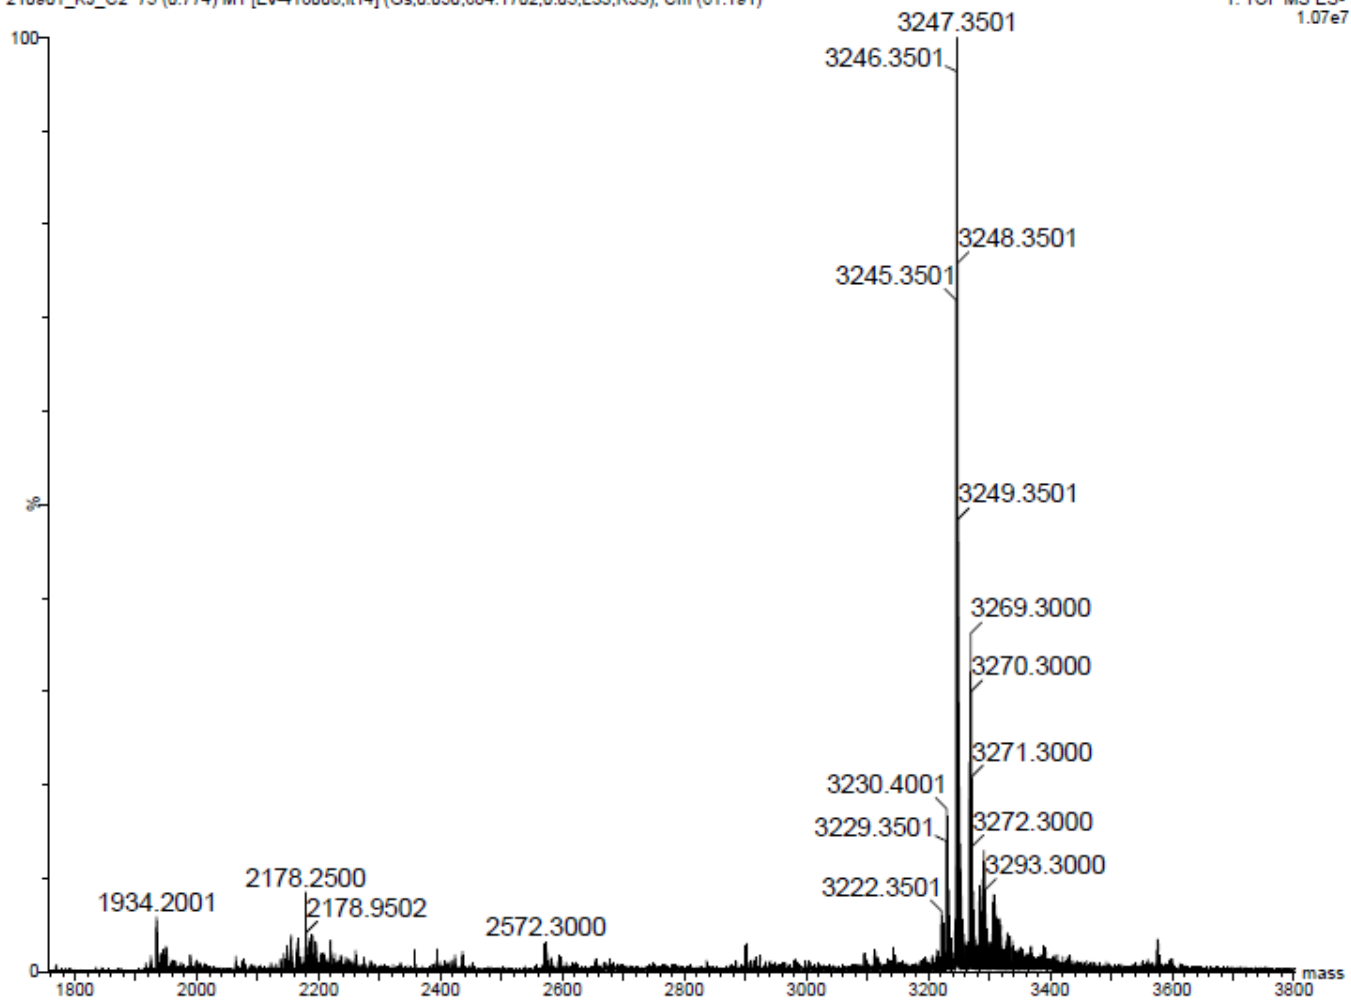

<sup>M</sup>CS oligomer

210426\_KJ\_A 41 (0.437) M1 [Ev-520452,It18] (Gs,0.040,498:1692,0.10,L33,R33); Sb (25,5.00 ); Cm (41:191)

1: TOF MS ES-  
9.56e7

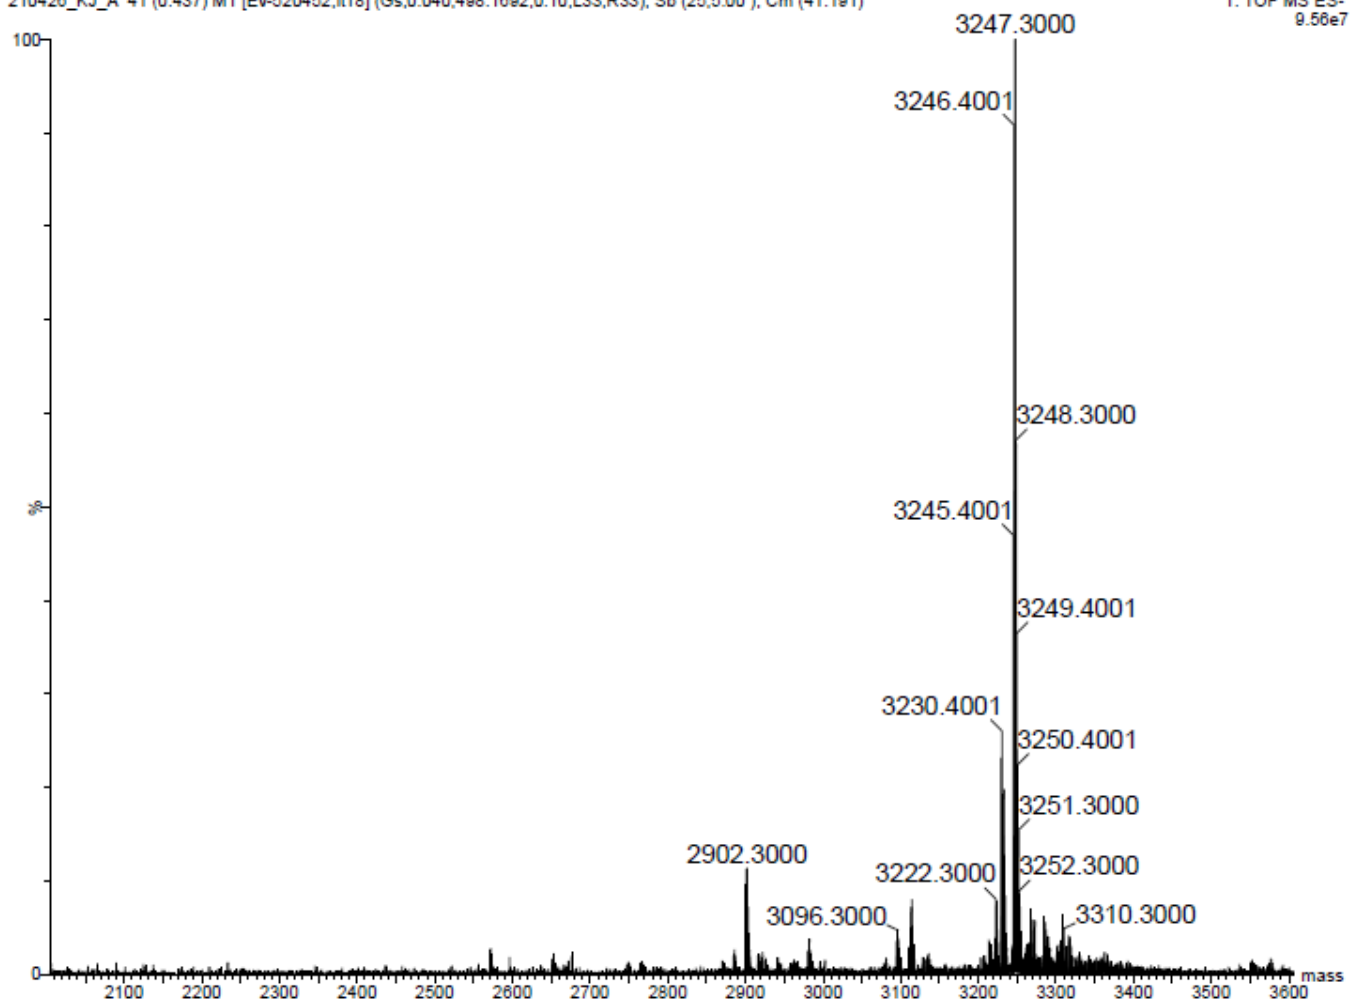

<sup>M</sup>GR oligomer



210420\_KJ\_11\_ 193 (1.957) M1 [Ev-503684,t114] (Gs,0.032,804:1755,0.01,L33,R33); Sb (25,15.00 ); Cm (20:197)

1: TOF MS ES-  
4.77e6

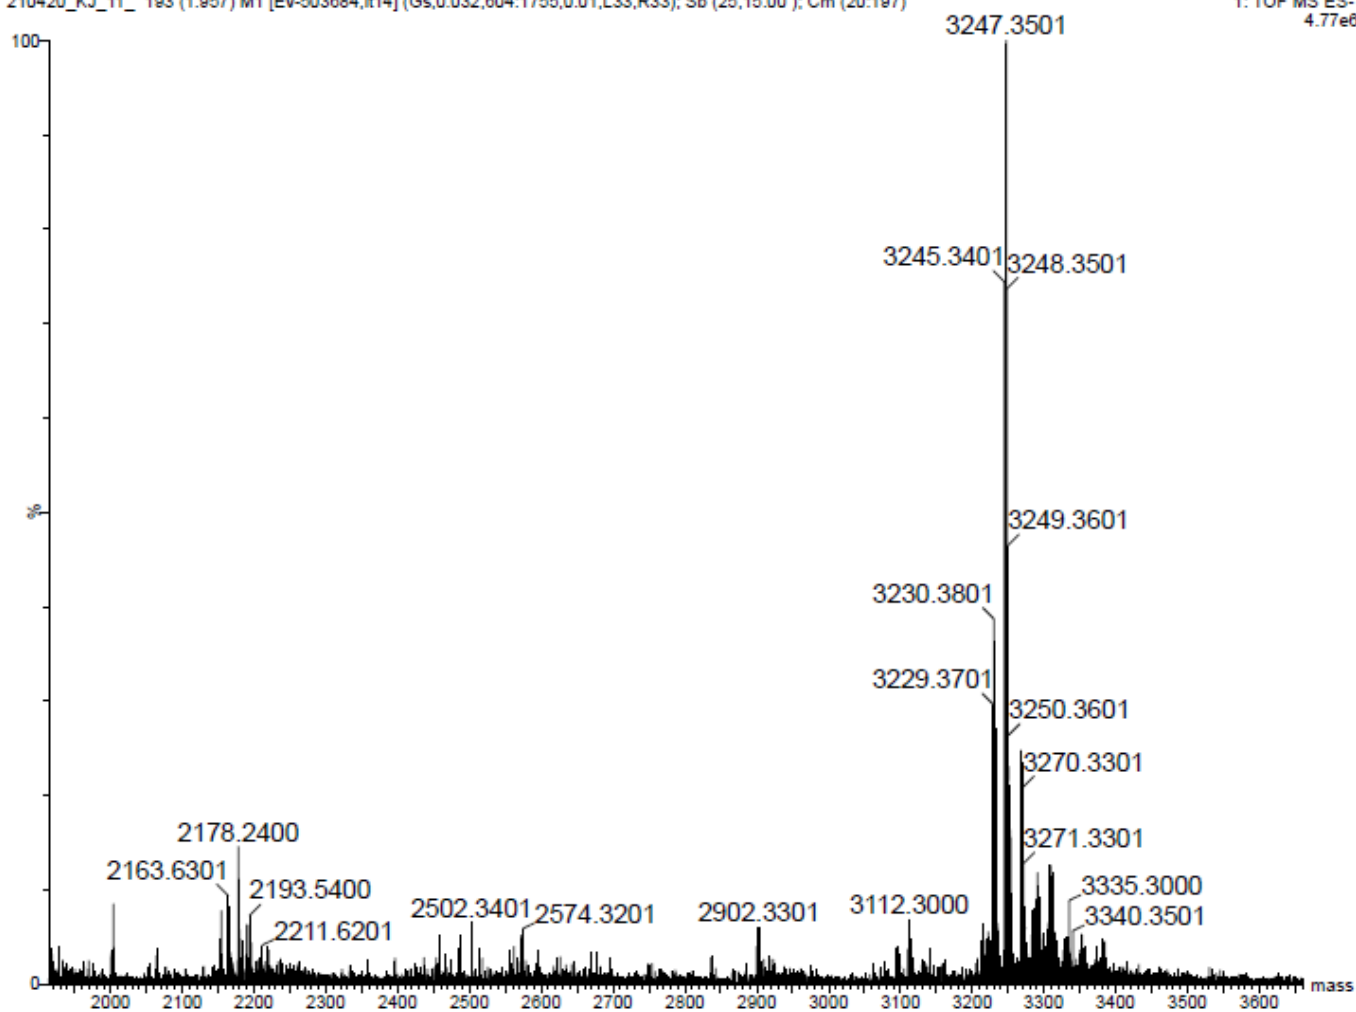

<sup>M</sup>GS oligomer

210415\_KJ\_2\_ 50 (0.525) M1 [Ev-489006,It16] (Gs,0.032,587:1678,0.01,L33,R33); Cm (29:197)

1: TOF MS ES-  
2.58e6

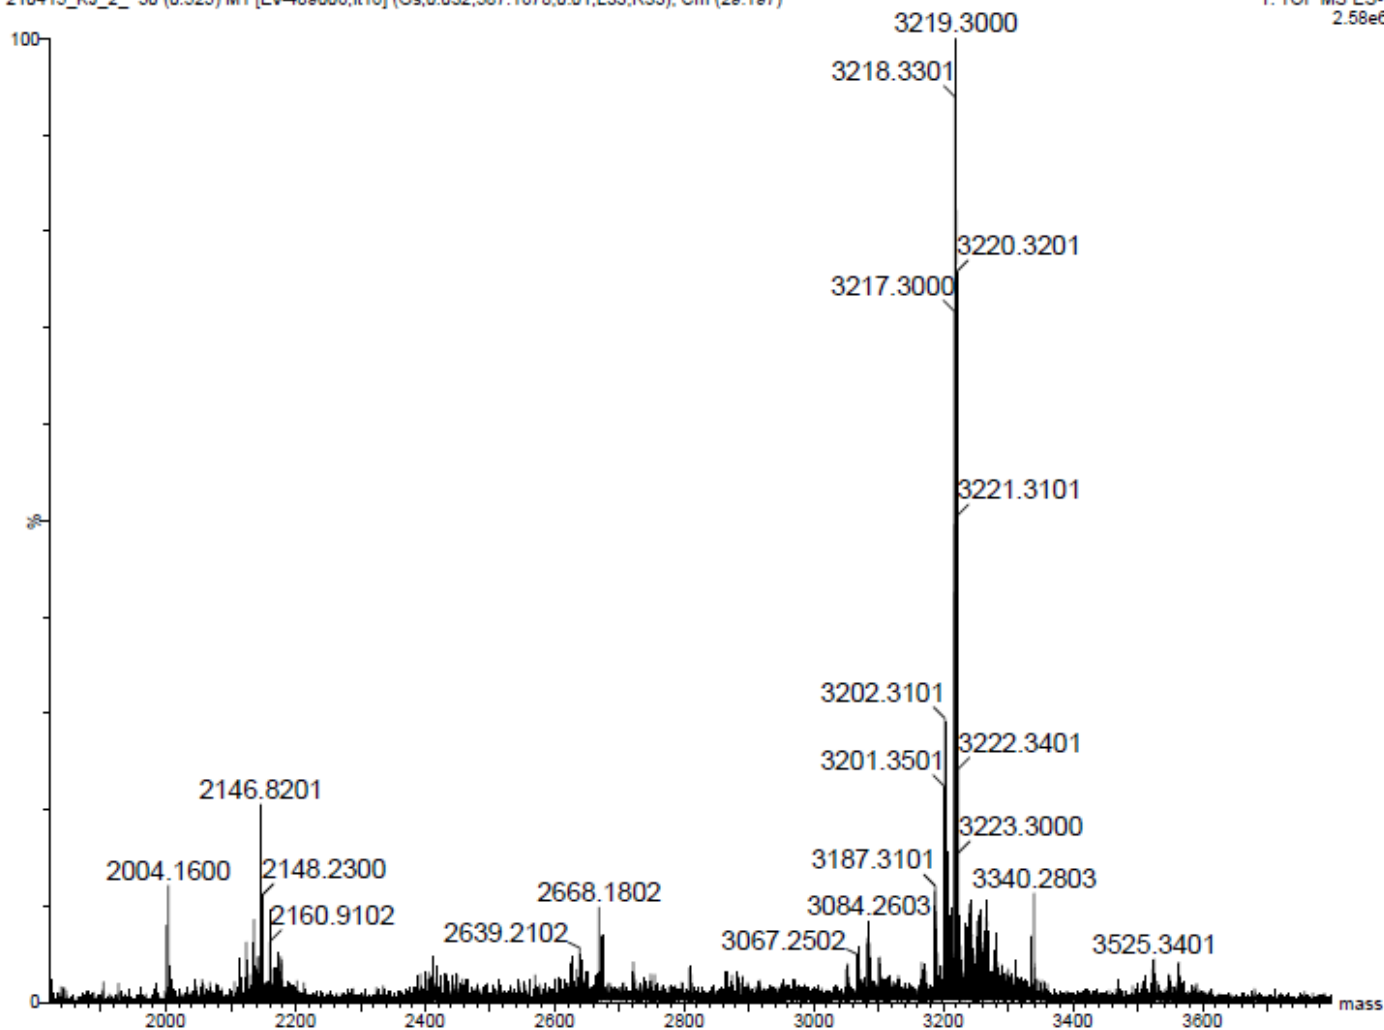

<sup>M</sup>UR oligomer

210415\_KJ\_1\_ 113 (1.157) M1 [Ev-502698,It17] (Gs,0.032,554:1695,0.02,L33,R33); Sb (25,5.00 ); Cm (81:197) 1: TOF MS ES- 7.93e6

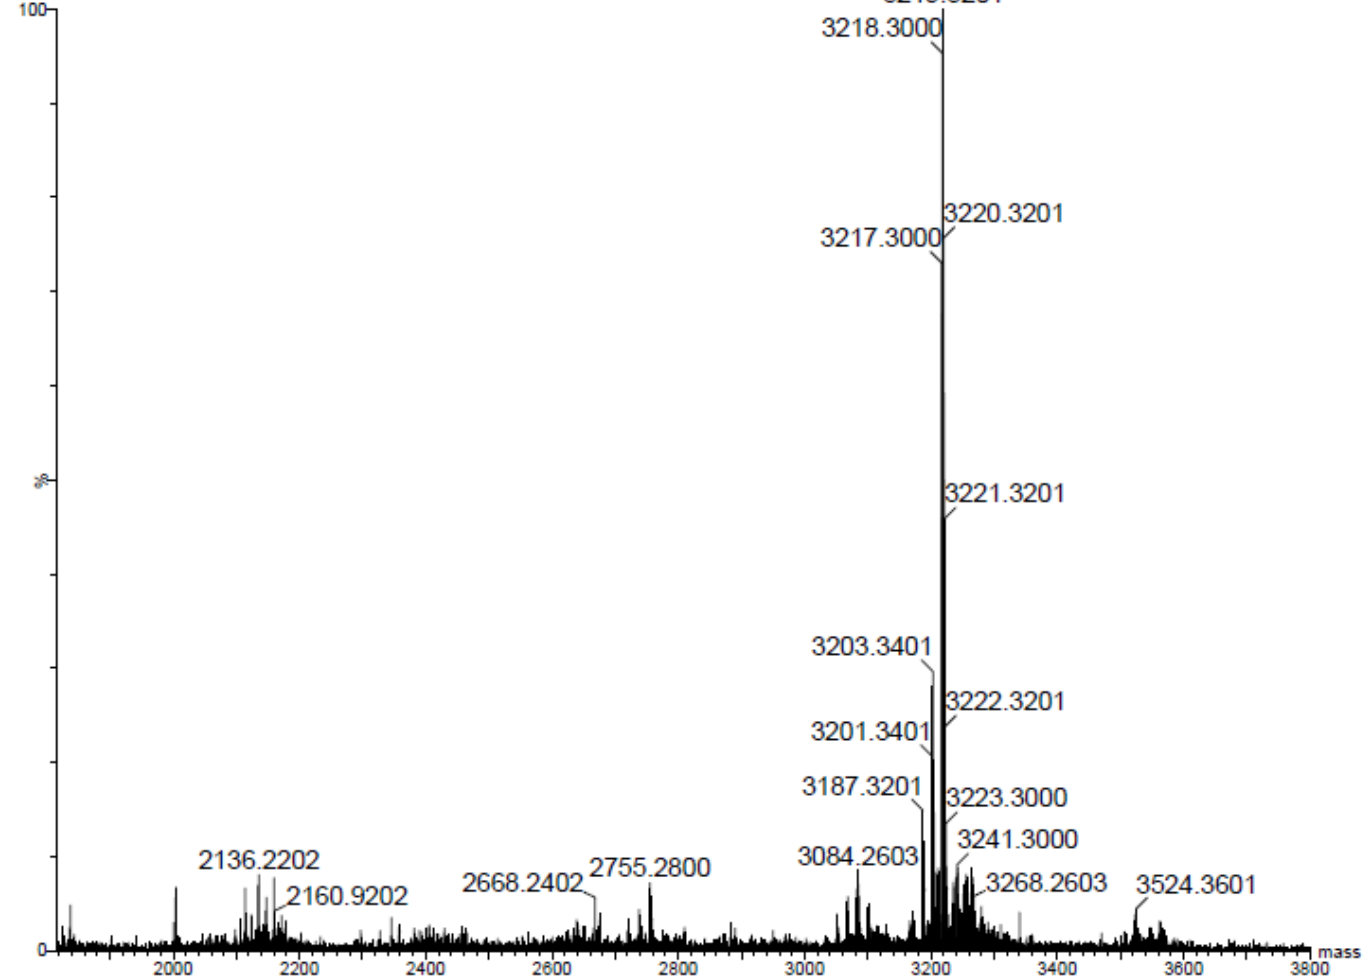

<sup>M</sup>US oligomer

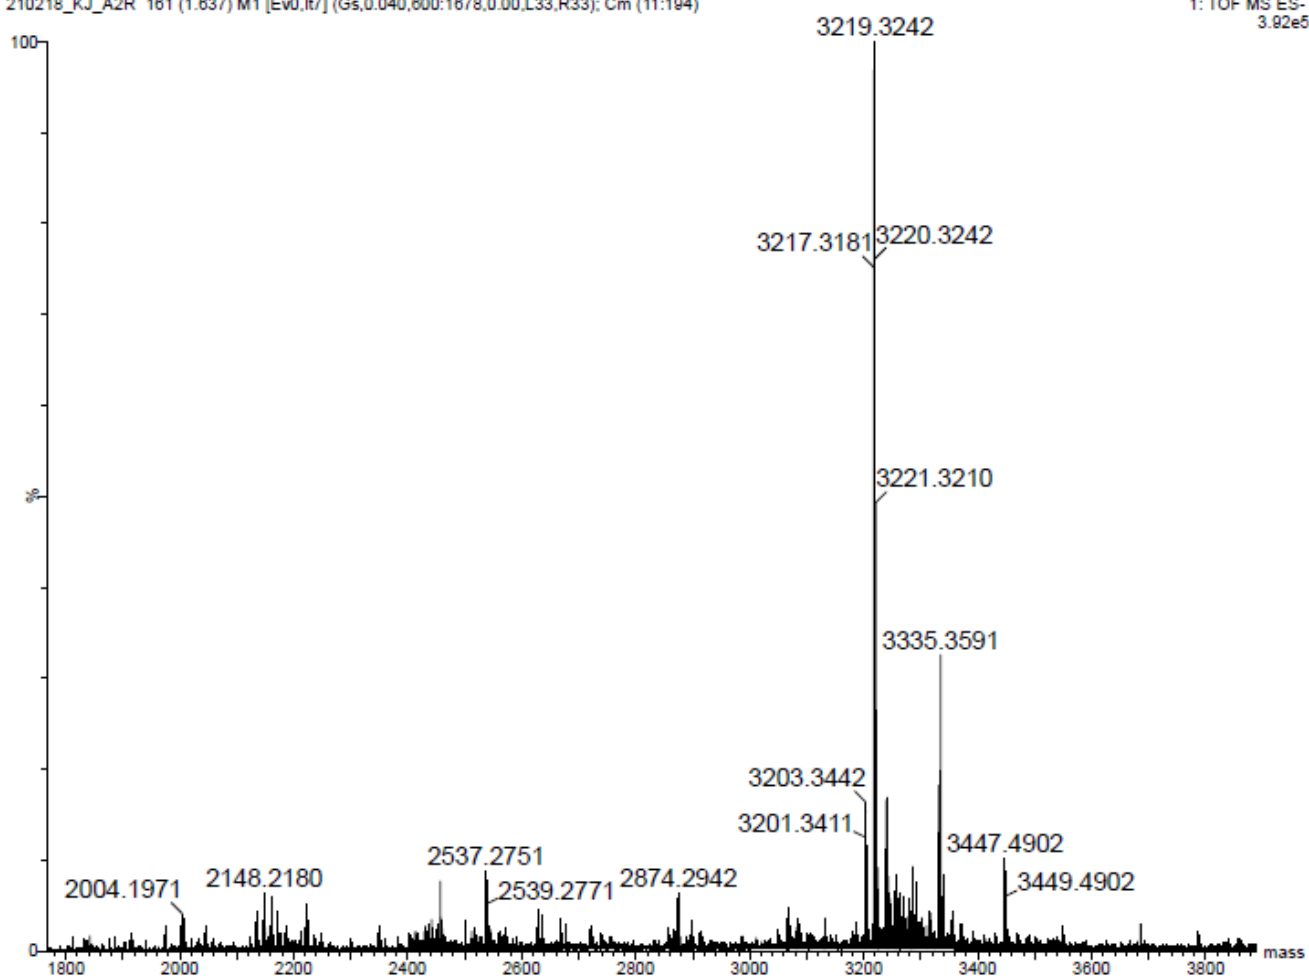

AR oligomer

210426\_KJ\_D 73 (0.757) M1 [Ev-587024.It16] (Gs,0.040,526:1718,0.01,L33,R33); Cm (58:198)

1: TOF MS ES-  
1.34e7

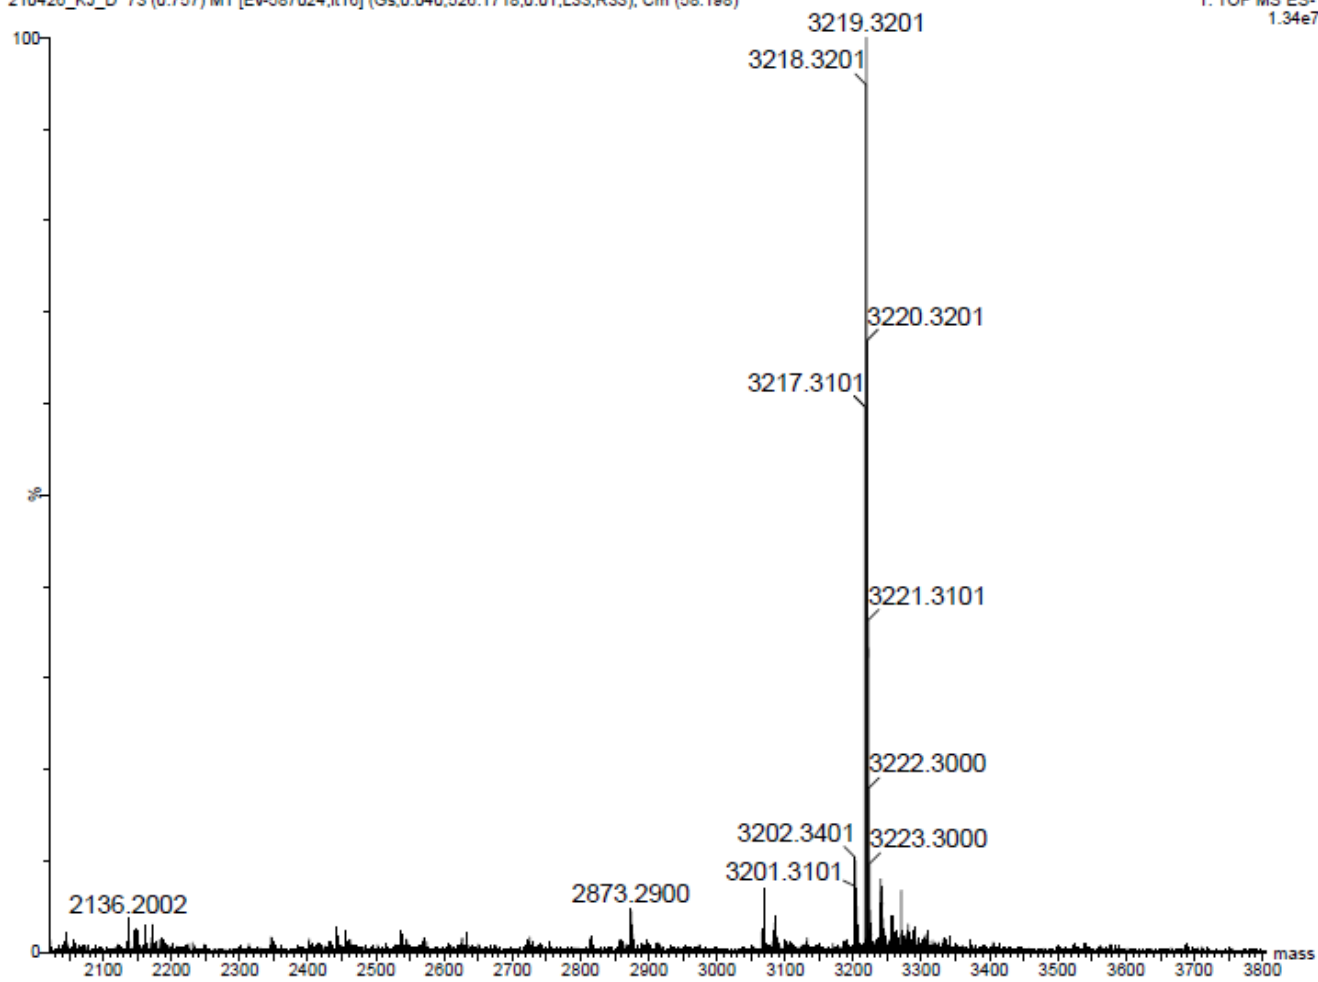

AS oligomer

210415\_KJ\_10 101 (1.031) M1 [Ev-643128,It15] (Gs,0.032,475:1790,0.01,L33,R33); Cm (56:197)

1: TOF MS ES-  
6.30e6

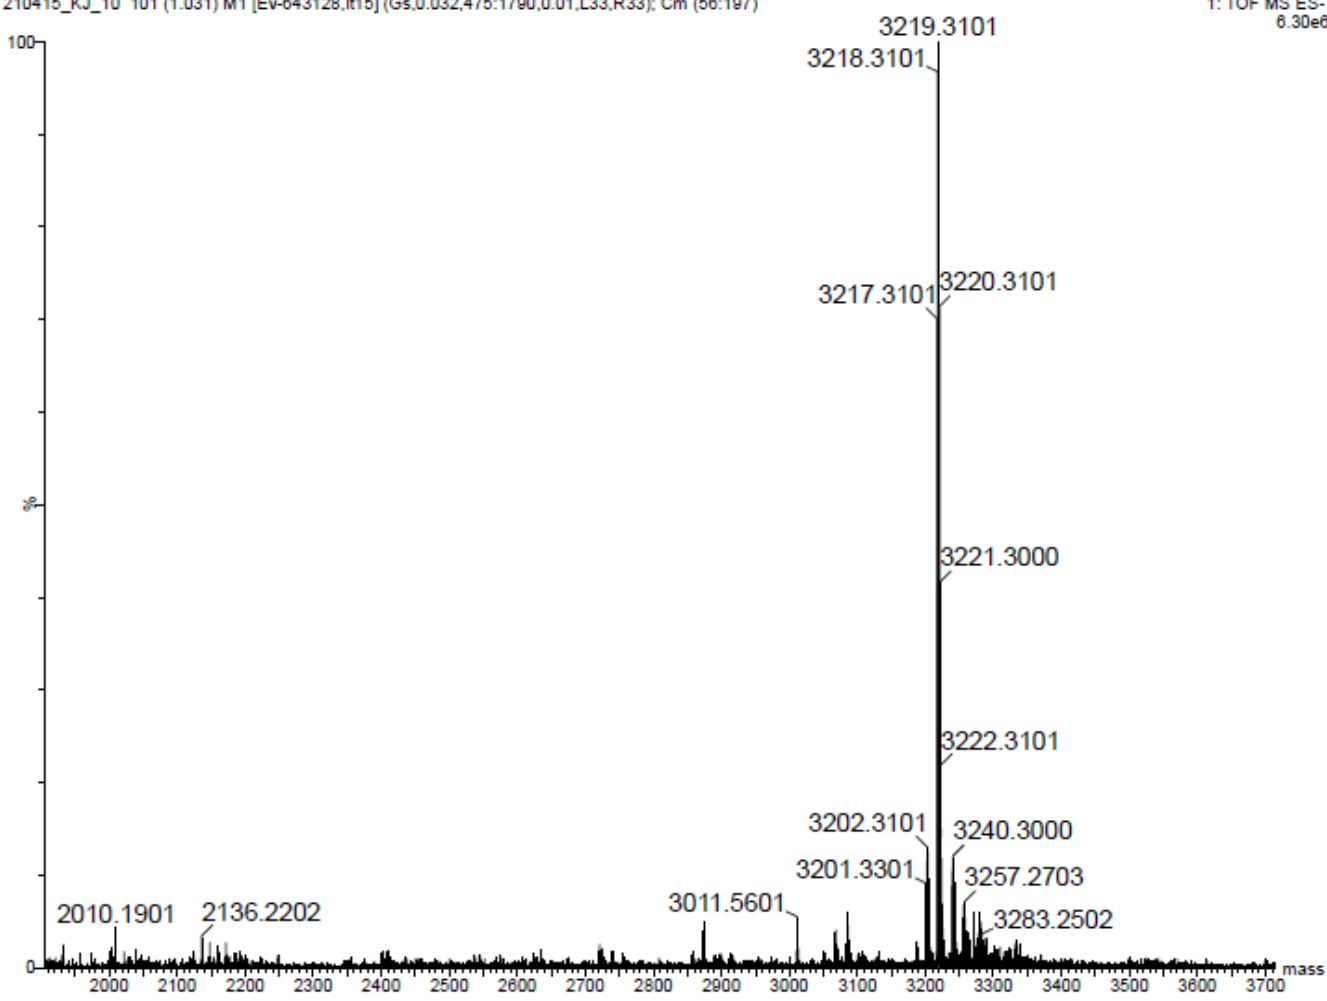

CR oligomer

210721\_KJ\_H 38 (0.400) M1 [Ev-444446,It16] (Gs,0.050,622:1694,0.05,L33,R33); Cm (34:197)

1: TOF MS ES-  
7.62e6

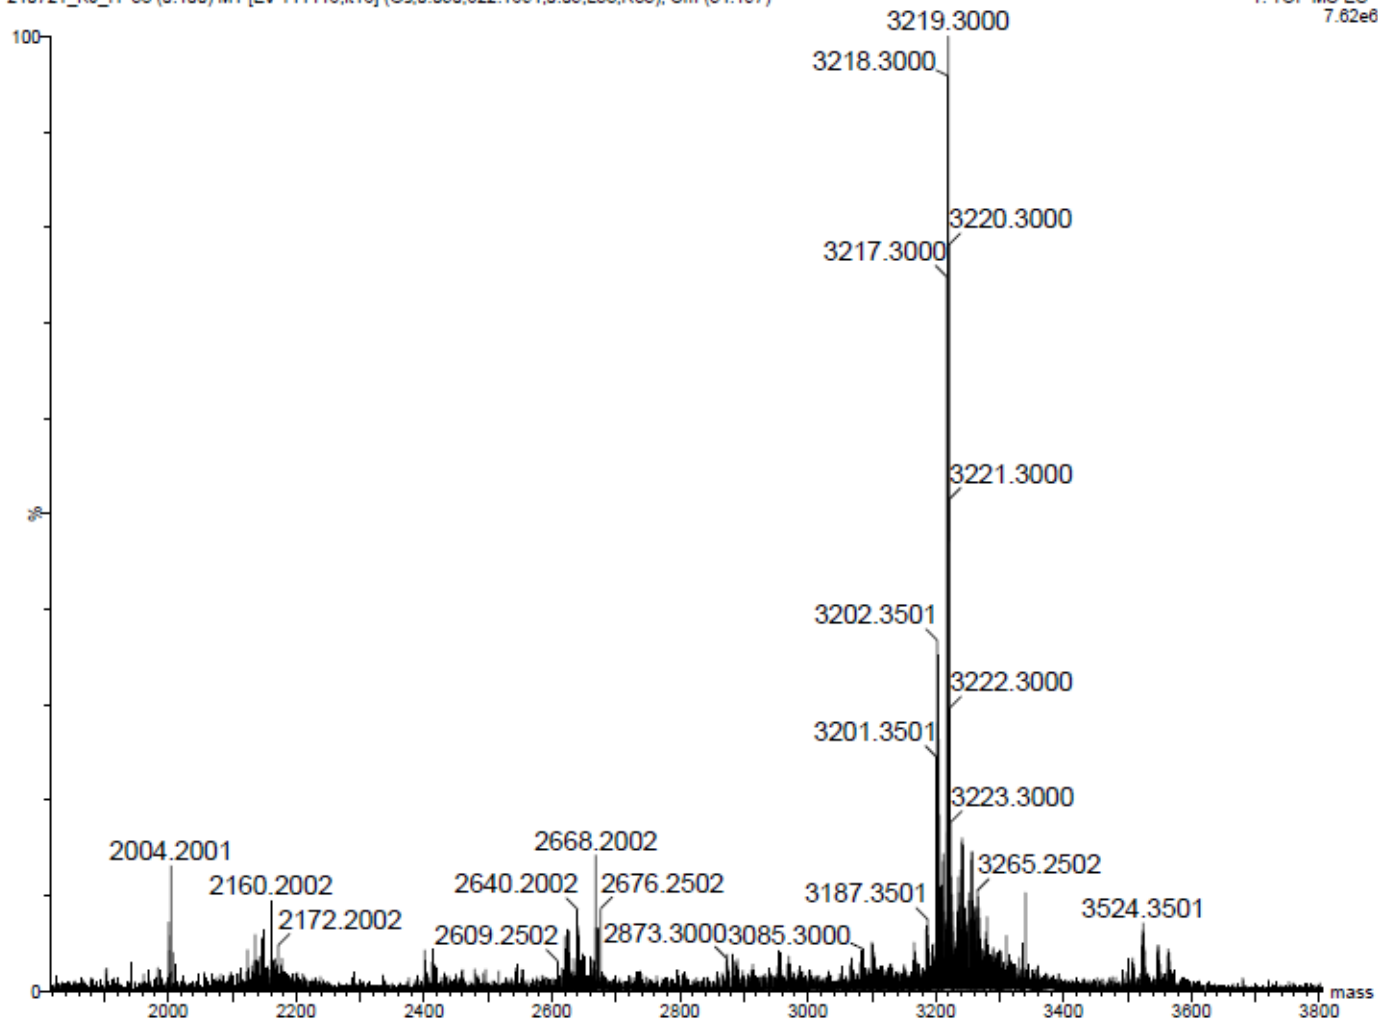

CS oligomer

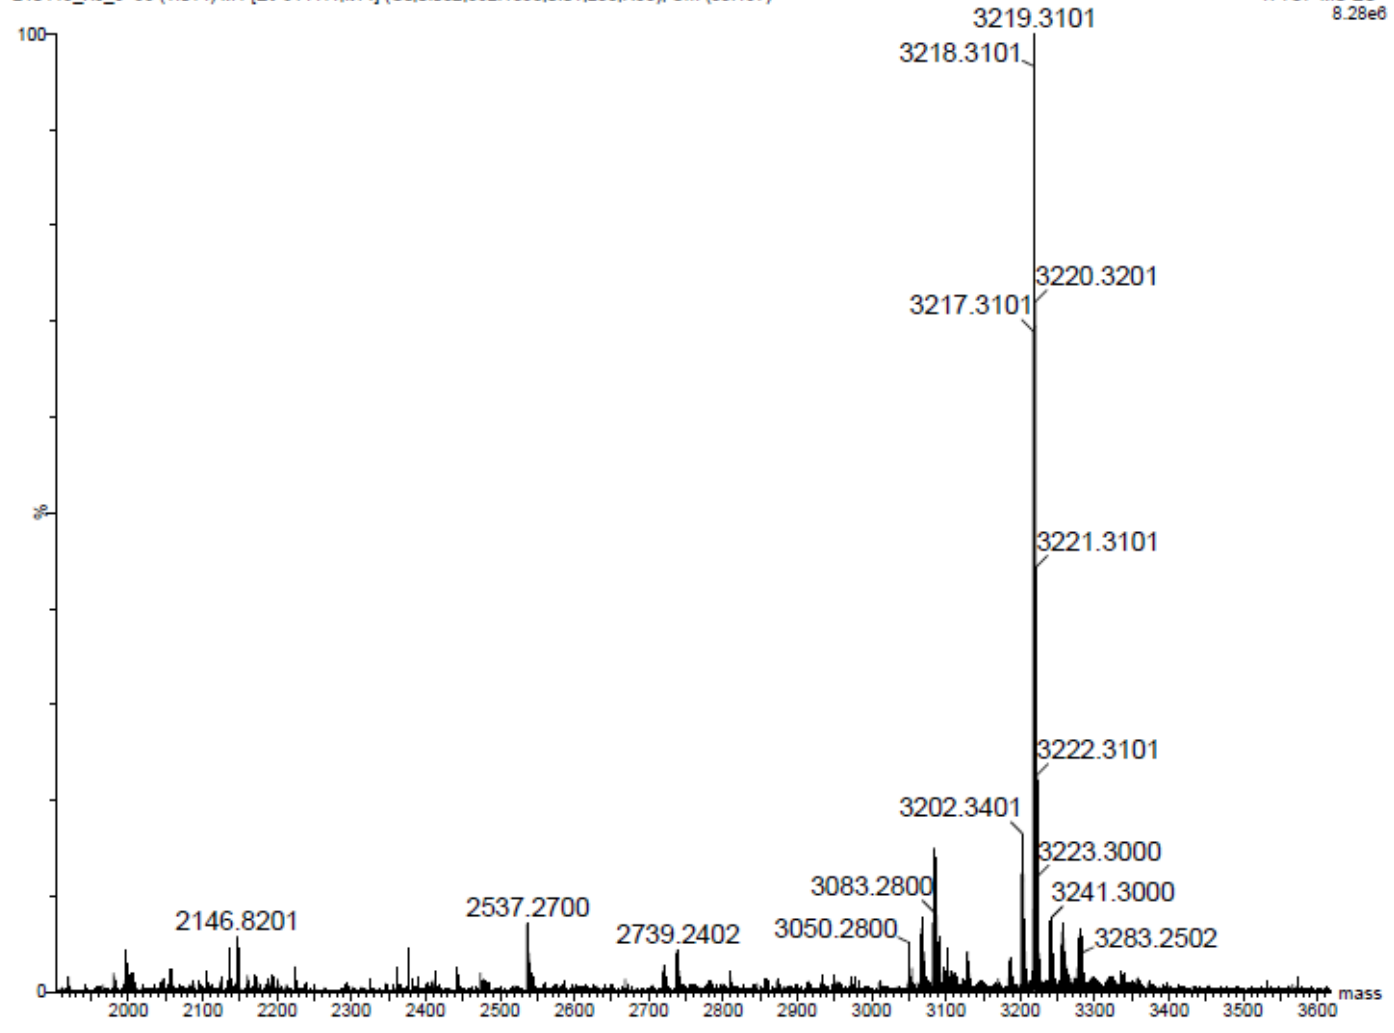

GR oligomer



210415\_KJ\_6 193 (1.957) M1 [Ev-594487,It15] (Gs,0.032,481:1795,0.01,L33,R33); Sb (25,5.00 ); Cm (74:197)

1: TOF MS ES-  
1.40e6

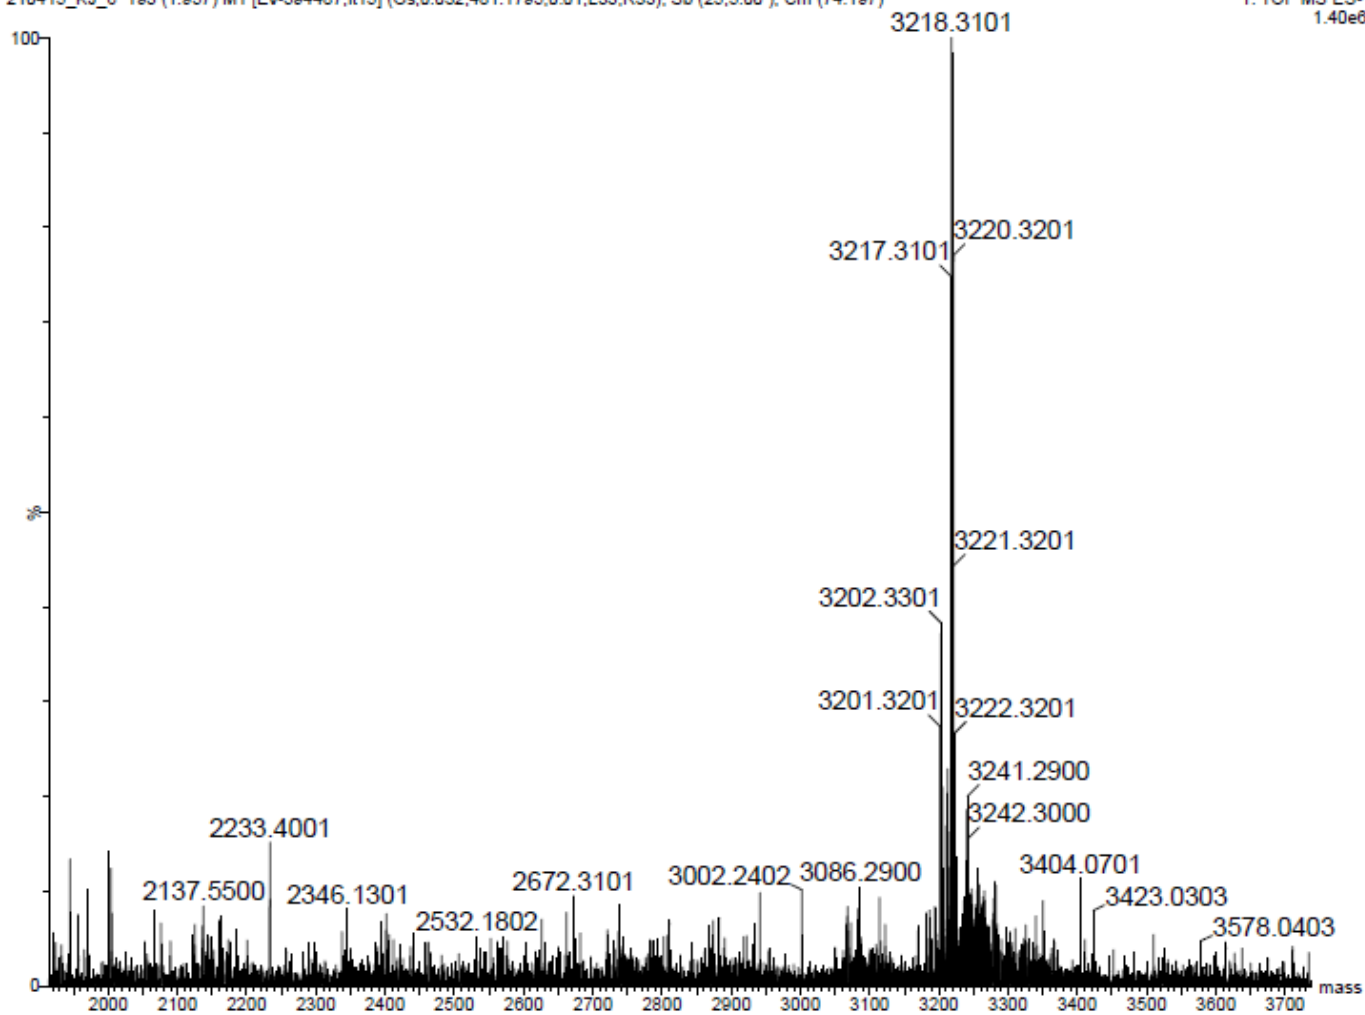

GS oligomer

210721\_KJ\_M 42 (0.446) M1 [Ev-485622,It15] (Gs,0.050,590:1755,0.05,L33,R33); Cm (39:182)

1: TOF MS ES-  
8.59e6

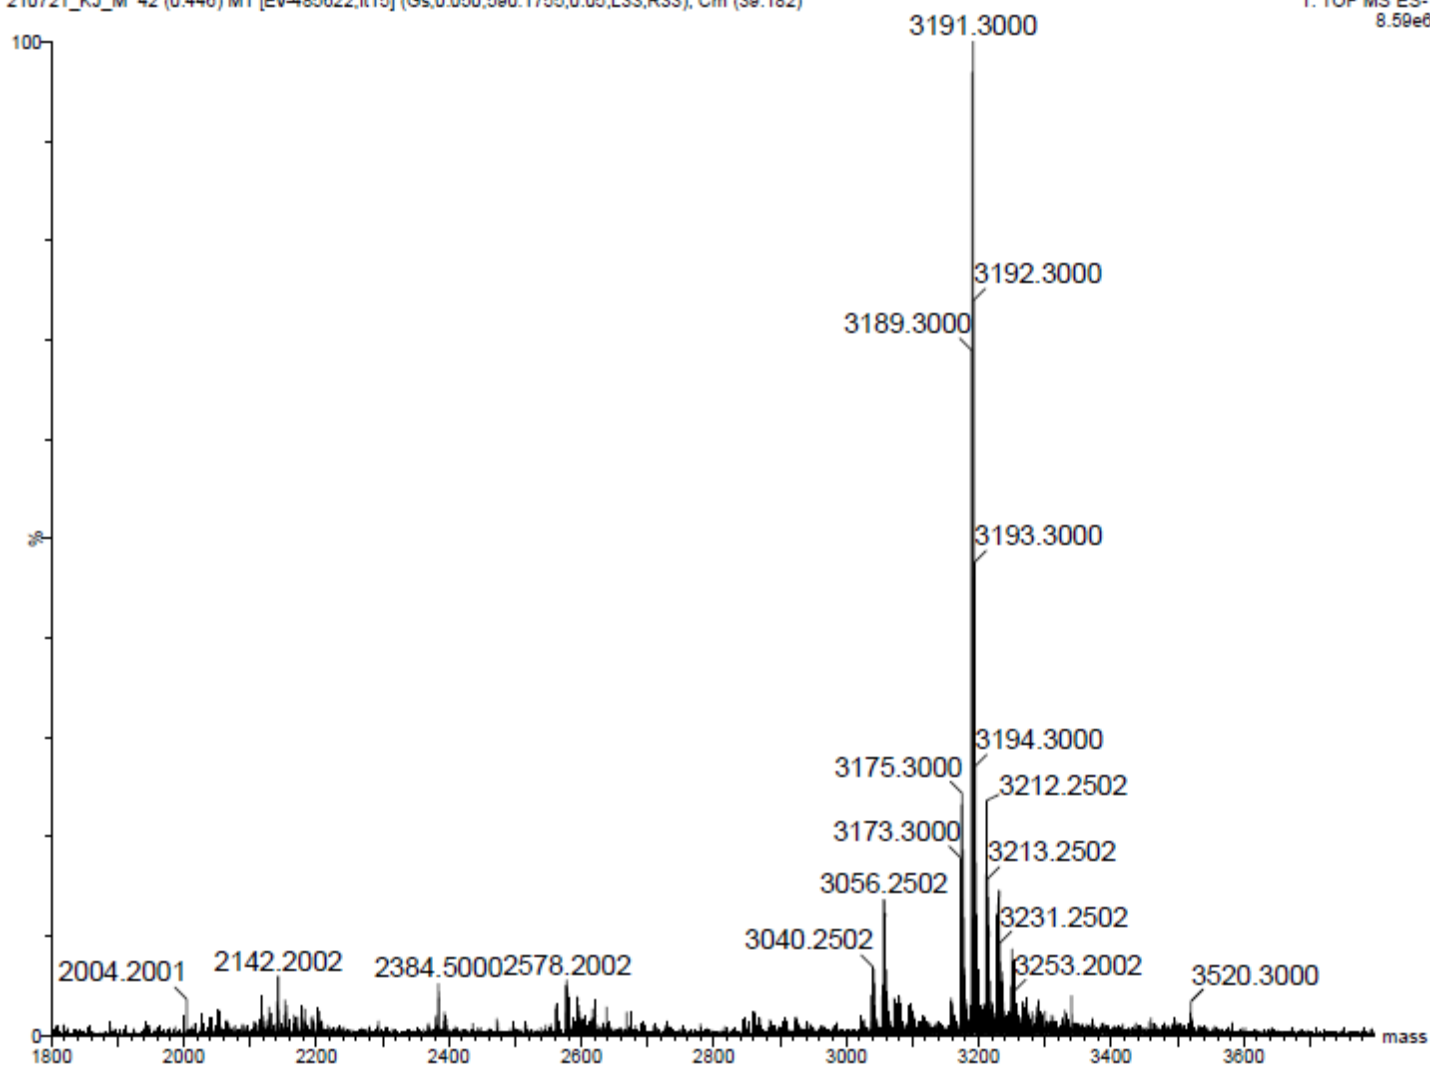

US oligomer

**Table S2. Efficiency of coupling (cpl) with 2 and 3 in synthesis of [PS]-{DNA:<sup>M</sup>RNA} and [PS]-{DNA:RNA}, respectively, calculated from the DMT<sup>+</sup> decay assay. PSCh = [PS]-Chimeric oligomer.**

| sequence    | PSCh            | 1st cpl. with 2 | 2nd cpl. with 2 | PSCh | 1st cpl. with 3 | 2nd cpl. with 3 |
|-------------|-----------------|-----------------|-----------------|------|-----------------|-----------------|
| t gtcAgctAg | <sup>M</sup> AR | -               | -               | AR   | 0.75            | 0.81            |
|             | <sup>M</sup> AS | 0.76            | 0.72            | AS   | 0.86            | 0.85            |
| tgtCagCtag  | <sup>M</sup> CR | 0.82            | 0.74            | CR   | 0.84            | 0.83            |
|             | <sup>M</sup> CS | 0.84            | 0.83            | CS   | 0.77            | 0.86            |
| tGtcaGtag   | <sup>M</sup> GR | 0.77            | 0.69            | GR   | 0.90            | 0.55            |
|             | <sup>M</sup> GS | 0.83            | 0.70            | GS   | 0.63            | 0.85            |
| tgUcagUag   | <sup>M</sup> UR | 0.78            | 0.81            | UR   | 0.64            | 0.84            |
|             | <sup>M</sup> US | 0.85            | 0.82            | US   | 0.89            | 0.75            |
|             |                 | AVG: 0.78       |                 |      | AVG: 0.79       |                 |
